# Supplementary material for: Identification of influenza urban transmission patterns by geographical, epidemiological and whole genome sequencing data: protocol for an observational study
Source: PubMed Central journal article supplement — BMJ Open. 2019 Aug 20;9(8):e030913. doi: 10.1136/bmjopen-2019-030913 (PMC6707652; doi:10.1136/bmjopen-2019-030913), 2019-08-20
Supplement: bmjopen-2019-030913.draft_revisions.pdf [file bmjopen-2019-030913.draft_revisions.pdf]

# BMJ Open

BMJ Open is committed to open peer review. As part of this commitment we make the peer review history of every article we publish publicly available.

When an article is published we post the peer reviewers' comments and the authors' responses online. We also post the versions of the paper that were used during peer review. These are the versions that the peer review comments apply to.

The versions of the paper that follow are the versions that were submitted during the peer review process. They are not the versions of record or the final published versions. They should not be cited or distributed as the published version of this manuscript.

BMJ Open is an open access journal and the full, final, typeset and author-corrected version of record of the manuscript is available on our site with no access controls, subscription charges or pay-per-view fees (<http://bmjopen.bmj.com>).

If you have any questions on BMJ Open's open peer review process please email [info.bmjopen@bmj.com](mailto:info.bmjopen@bmj.com)

# BMJ Open

## Identification of influenza urban transmission patterns by geographical, epidemiological and whole genome sequencing data: Study protocol.

|                               |                                                                                                                                                                                                                                                                                                                                                                                                                                                                                                                                                                                                                                                                                                                                                                                                                                                                                                                                                                                                                                                                                                                                                                                                                                                                                                                                                                                                                                                                                                                                                                                                                                                                                                                                                                                                                                                                                                                                                                                                                                  |
|-------------------------------|----------------------------------------------------------------------------------------------------------------------------------------------------------------------------------------------------------------------------------------------------------------------------------------------------------------------------------------------------------------------------------------------------------------------------------------------------------------------------------------------------------------------------------------------------------------------------------------------------------------------------------------------------------------------------------------------------------------------------------------------------------------------------------------------------------------------------------------------------------------------------------------------------------------------------------------------------------------------------------------------------------------------------------------------------------------------------------------------------------------------------------------------------------------------------------------------------------------------------------------------------------------------------------------------------------------------------------------------------------------------------------------------------------------------------------------------------------------------------------------------------------------------------------------------------------------------------------------------------------------------------------------------------------------------------------------------------------------------------------------------------------------------------------------------------------------------------------------------------------------------------------------------------------------------------------------------------------------------------------------------------------------------------------|
| Journal:                      | <i>BMJ Open</i>                                                                                                                                                                                                                                                                                                                                                                                                                                                                                                                                                                                                                                                                                                                                                                                                                                                                                                                                                                                                                                                                                                                                                                                                                                                                                                                                                                                                                                                                                                                                                                                                                                                                                                                                                                                                                                                                                                                                                                                                                  |
| Manuscript ID                 | bmjopen-2019-030913                                                                                                                                                                                                                                                                                                                                                                                                                                                                                                                                                                                                                                                                                                                                                                                                                                                                                                                                                                                                                                                                                                                                                                                                                                                                                                                                                                                                                                                                                                                                                                                                                                                                                                                                                                                                                                                                                                                                                                                                              |
| Article Type:                 | Protocol                                                                                                                                                                                                                                                                                                                                                                                                                                                                                                                                                                                                                                                                                                                                                                                                                                                                                                                                                                                                                                                                                                                                                                                                                                                                                                                                                                                                                                                                                                                                                                                                                                                                                                                                                                                                                                                                                                                                                                                                                         |
| Date Submitted by the Author: | 20-Apr-2019                                                                                                                                                                                                                                                                                                                                                                                                                                                                                                                                                                                                                                                                                                                                                                                                                                                                                                                                                                                                                                                                                                                                                                                                                                                                                                                                                                                                                                                                                                                                                                                                                                                                                                                                                                                                                                                                                                                                                                                                                      |
| Complete List of Authors:     | <p>Egli, Adrian; University Hospital Basel, Clinical Microbiology; University of Basel, Biomedicine<br/>         Saalfrank, Claudia; University of Basel<br/>         Goldman, Nina; University of Basel, Environmental Sciences<br/>         Brunner, Myrta; University of Basel, Environmental Sciences<br/>         Hollenstein, Yvonne; University of Basel, Biomedicine<br/>         Vogel, Thomas; University of Basel, th.vogel@unibas.ch<br/>         Augustin, Noémie; University of Basel, Environmental Sciences<br/>         Wüthrich, Daniel; University Hospital Basel, Clinical Microbiology<br/>         Seth-Smith, Helena; University Hospital Basel, Clinical Microbiology<br/>         Roth, Elisa; University of Basel, Biomedicine<br/>         Syedbasha, Mohammedyaseen; University of Basel<br/>         Mueller, Nicola; ETH Zurich D-BSSE, Biosystems Science and Engineering<br/>         Vogt, Dominik; University of Basel, Biomedicine<br/>         Bauer, Jan; University of Basel, Environmental Sciences<br/>         Amar-Sliwa, Nadezhda ; University of Basel, Environmental Sciences<br/>         Meinel, Dominik; University Hospital Basel, Clinical Microbiology<br/>         Dubuis, Olivier ; Viollier AG, Microbiology<br/>         Naegele, Michael; Viollier AG, Microbiology<br/>         Tschudin-Sutter, Sarah; University Hospital Basel<br/>         Buser, Andreas; Blood donation center of both Basel<br/>         Nickel , Christian; University Hospital Basel, Emergency Medicine<br/>         Zeller, Andreas; University of Basel, Centre for Primary Health Care<br/>         Ritz, Nicole; UKBB Universitats-Kinderspital, Pediatric Infectious Diseases and Vaccinology<br/>         Battegay, Manuel; University Hospital Basel, Division of Infectious Diseases and Hospital Epidemiology<br/>         Stadler, Tanja; ETH Zurich D-BSSE, Biosystems Science and Engineering<br/>         Schneider-Sliwa, Rita; University of Basel, Environmental Sciences</p> |
| Keywords:                     | Study desig, transmission, whole genome sequencing, geography, questionnaire, influenza                                                                                                                                                                                                                                                                                                                                                                                                                                                                                                                                                                                                                                                                                                                                                                                                                                                                                                                                                                                                                                                                                                                                                                                                                                                                                                                                                                                                                                                                                                                                                                                                                                                                                                                                                                                                                                                                                                                                          |
|                               |                                                                                                                                                                                                                                                                                                                                                                                                                                                                                                                                                                                                                                                                                                                                                                                                                                                                                                                                                                                                                                                                                                                                                                                                                                                                                                                                                                                                                                                                                                                                                                                                                                                                                                                                                                                                                                                                                                                                                                                                                                  |

SCHOLARONE™  
Manuscripts

1  
2  
3  
4  
5  
6  
7  
8  
9  
10  
11  
12  
13  
14  
15  
16  
17  
18  
19  
20  
21  
22  
23  
24  
25  
26  
27  
28  
29  
30  
31  
32  
33  
34  
35  
36  
37  
38  
39  
40  
41  
42  
43  
44  
45  
46  
47  
48  
49  
50  
51  
52  
53  
54  
55  
56  
57  
58  
59  
60

1  
2  
3 1 **Identification of influenza urban transmission patterns by geographical,**  
4 2 **epidemiological and whole genome sequencing data: Study protocol.**  
5  
6 3

7 4 Adrian Egli<sup>1,2,3\*</sup>, Claudia Saalfrank<sup>4</sup>, Nina Goldman<sup>4</sup>, Myrta Brunner<sup>4</sup>, Yvonne Hollenstein<sup>2</sup>,  
8 5 Thomas Vogel<sup>4</sup>, Noémie Augustin<sup>4</sup>, Daniel Wüthrich<sup>1,2,5</sup>, Helena M.B. Seth-Smith<sup>1,2,5</sup>, Elisa  
9 6 Roth<sup>1,2</sup>, Mohammedyaseen Syedbasha<sup>2</sup>, Nicola F. Müller<sup>5,6</sup>, Dominik Vogt<sup>2</sup>, Jan Bauer<sup>4</sup>,  
10 7 Nadezhda Amar-Sliwa<sup>4</sup>, Dominik M. Meinel<sup>1,2</sup>, Olivier Dubuis<sup>7</sup>, Michael Nägele<sup>7</sup>, Sarah  
11 8 Tschudin-Sutter<sup>3,8</sup>, Andreas Buser<sup>9</sup>, Christian H. Nickel<sup>10</sup>, Andreas Zeller<sup>11</sup>, Nicole Ritz<sup>12</sup>,  
12 9 Manuel Battegay<sup>8,§</sup>, Tanja Stadler<sup>5,6,§</sup>, Rita Schneider-Sliwa<sup>4,§</sup>  
13  
14 10

15 11 <sup>1</sup> Division of Clinical Microbiology, University Hospital Basel, Basel, Switzerland

16 12 <sup>2</sup> Applied Microbiology Research, Department of Biomedicine, University of Basel, Basel,  
17 13 Switzerland

18 14 <sup>3</sup> Department of Clinical Research, University of Basel, Basel, Switzerland

19 15 <sup>4</sup> Human Geography, Department for Environmental Sciences, University of Basel, Basel,  
20 16 Switzerland

21 17 <sup>5</sup> Swiss Institute for Bioinformatics, Basel, Switzerland

22 18 <sup>6</sup> Department of Biosystems Science and Engineering, ETH Zürich, Basel, Switzerland

23 19 <sup>7</sup> Clinical Microbiology, Viollier AG, Allschwil, Switzerland

24 20 <sup>8</sup> Division of Infectious Diseases and Hospital Epidemiology, University Hospital Basel,  
25 21 University of Basel, Basel, Switzerland

26 22 <sup>9</sup> Blood donation center of both Basel, Swiss Red Cross, Basel, Switzerland

27 23 <sup>10</sup> Department of Emergency Medicine, University Hospital Basel, Basel, Switzerland

28 24 <sup>11</sup> Centre for Primary Health Care, University of Basel, Basel, Switzerland

29 25 <sup>12</sup> Pediatric Infectious Diseases and Vaccinology, University Children's Hospital Basel and  
30 26 University of Basel, Basel Switzerland  
31 27

32 28 Short Title: Influenza transmission study: study design  
33 29

34 30 Keywords: Study design, transmission, whole genome sequencing, geography, GIS maps,  
35 31 questionnaire, Influenza A, virus, typing, method  
36 32

37 33 § equally contributed to the manuscript  
38 34

39 35 \*corresponding author:  
40 36

41 37 Adrian Egli, MD PhD

42 38 Division of Clinical Microbiology

43 39 University Hospital Basel

44 40 Petersgraben 4

45 41 4031 Basel, Switzerland

46 42 E-mail: [adrian.egli@usb.ch](mailto:adrian.egli@usb.ch)

47 43 Phone: +41 61 556 57 49  
48  
49  
50  
51  
52  
53  
54  
55  
56  
57  
58  
59  
60

**Abstract (words 281):**

*Introduction:* Urban transmission patterns of influenza viruses are complex and poorly understood, and multiple factors may play a critical role in modifying transmission. Whole genome sequencing (WGS) allows the description of patient-to-patient transmissions at highest resolution. The aim of this study is to explore urban transmission patterns of influenza viruses in high detail by combining geographical, epidemiological, and immunological data with WGS data.

*Methods and Analysis:* The study is performed at the University Hospital Basel, University Children's Hospital Basel, and a network of pediatricians and family doctors in the Canton of Basel-City, Switzerland. The retrospective study part includes an analysis of PCR-confirmed influenza cases from 2013 to 2018. The prospective study parts include (i) a household survey regarding influenza-like illness (ILI) and vaccination against influenza during the 2015/2016 season; (ii) an analysis of influenza viruses collected during the 2016/2017 season using WGS - viral genomic sequences are compared to determine genetic relatedness and transmissions; and (iii) measurement of influenza-specific antibody titers against all vaccinated and circulated strains during the 2016/2017 season from healthy individuals, allowing to monitor herd immunity across urban quarters. Survey data and PCR-confirmed cases are linked to data from the Statistics Office of the Canton Basel-City and visualized using geo-information-system (GIS) mapping. WGS data will be analyzed in the context of patient epidemiological data using phylodynamic analyses, and the obtained herd immunity for each quarter.

Profound knowledge on the key geographical, epidemiological and immunological factors influencing urban influenza transmission will help to develop effective counter measurements.

*Ethics and dissemination:* The study is registered (clinicaltrials.gov; NCT03010007 on 22<sup>nd</sup> December 2016) and approved by the regional ethics committee as an observational study (EKNZ project ID 2015–363 and 2016-01735). It is planned to present the results at conferences and publish the data in scientific journals.

**Strength and limitations:**

- **Strength:**
  - To date largest study on influenza transmission in a city
  - high resolution and granularity of demographic, epidemiological and geographical data
  - linkage of multiple dataset
  - analysis over several consecutive years
- **Limitations:**
  - not all Influenza infections can be captured in a study
  - survey may introduce bias: selection of the population replied
  - antibody titers only covers a part of the city

## 85 Introduction (words: 4234)

86 Seasonal influenza is associated with substantial morbidity, mortality, and healthcare costs.  
87 Transmission of influenza has been explored with various methods and techniques (1-3).  
88 Whole genome sequencing (WGS) has the highest possible technical resolution for molecular  
89 typing of viruses and is increasingly used to understand and monitor transmission events of  
90 influenza viruses. Recently, WGS technology helped to explore important aspects of  
91 transmissions within households (4), hospitals (5-7), university campuses (8), and between  
92 countries (9). However, most studies lack crucial details on the epidemiological and  
93 demographic context of the infected patients and therefore cannot provide sufficient in-depth  
94 knowledge on risk factors for and pathways of transmission. Understanding pathogen  
95 transmission from patient-to-patient, especially within the urban context, may inform public  
96 health interventions targeting specific transmission chains.

97  
98 Urban transmission clusters have not yet been explored in detail. The impact of host and  
99 environment factors within a city may greatly vary depending of the scale e.g. direct person-  
100 to-person, within an urban quarter, within and between countries, and around the globe. Within  
101 cities, multiple factors may entertain transmission, such as population densities, available  
102 living space per person, usage of public transport, social economic structures and behaviors,  
103 age, vaccine rates, and herd immunity. Urban quarters often vary greatly in some of those  
104 factors. Therefore, the differences accumulating within urban quarters may allow us to study  
105 the impact of geographical, social and demographic factors in the context of urban  
106 transmission of influenza. So far, only a few epidemiological studies have conceptualized  
107 these “geographic area” variables for influenza focused transmission and vaccine research  
108 (10-14).

109  
110 Combining detailed population related data with high-resolution WGS-based typing of  
111 influenza viruses may allow us to profoundly understand factors entertaining urban influenza  
112 transmission within the microenvironments of a city. Based on the generated knowledge,  
113 targeted public health policies can be informed. Furthermore, these findings may also be  
114 translated to other transmissible diseases. In this article, we describe in detail the study design  
115 of a three-year research project funded by the Swiss National Science Foundation  
116 (www.snsf.ch) to explore urban influenza transmission.

## 119 Aims and objectives

120 The main objective of this project is to explore the transmission patterns of influenza within a  
121 city. Geographical, epidemiological, microbiological, and immunological factors are analyzed  
122 to explain urban transmission patterns.

123  
124 The *specific aims of the retrospective study* parts are:

- 125 ● Analyzing PCR-confirmed influenza cases (seasons 2013/2014 to 2017/2018)
  - 126 (i) Accessing PCR-confirmed influenza cases from various institutions across Basel.
  - 127 (ii) Visualizing the frequency and spread of incidences with the help of point pattern and  
128 other analytical techniques including georeferencing individual cases.
  - 129 (iii) Analysis of influenza cases by mapping incidences with demographic data from the  
130 Statistical Office of the Canton Basel-City.

131  
132 The *specific aims of the prospective study* parts are:

- 1  
2  
3 133 ● Household survey (season 2015/2016)  
4 134 (i) Conducting household surveys within 10 urban quarters.  
5 135 (ii) Determination of the influenza like illness (ILI) rate on individual and urban quarters  
6 136 levels, and exploring factors associated with ILI.  
7 137 (iii) Determination of influenza vaccine rate on individual and urban quarters levels, and  
8 138 exploring factors associated with influenza vaccine rates.  
9 139 (iv) Linkage and analysis of data from the household survey with demographic data from  
10 140 the Statistics Office of the Canton Basel-Basel e.g. population density.  
11 141  
12 142 ● Transmission study  
13 143 (i) Building a prospective biobank of PCR-confirmed influenza patients including  
14 144 nasopharyngeal swabs, serum and blood samples.  
15 145 (ii) Sequencing of influenza viruses using WGS and performing phylogenetic analysis,  
16 146 revealing the relatedness of viral strains from individuals within Basel, as well as the  
17 147 relatedness of Basel sequences to foreign sequences obtained from public available  
18 148 databases.  
19 149 (iii) Analysis of transmission patterns in association with clinical, demographic,  
20 150 immunological, and geographical data.  
21 151  
22 152 ● Influenza-specific antibody titers  
23 153 (i) Determination of influenza-specific humoral immunity of healthy individuals and  
24 154 translating the titers to herd immunity levels within urban quarters during the influenza  
25 155 season.  
26 156  
27 157  
28 158  
29 159  
30 160  
31 161  
32 162  
33 163  
34 164  
35 165  
36 166  
37 167  
38 168  
39 169  
40 170  
41 171  
42 172  
43 173  
44 174  
45 175  
46 176  
47 177  
48 178  
49 179  
50 180

### **Patient and public involvement**

The study proposal was evaluated by the local ethical committee, reflecting a detailed evaluation of patient rights in conducting research. In the survey the public was informed via the questionnaire and in the influenza transmission study patients will be informed according to the laws and regulation of the Swiss Human Research Act including the previously mentioned evaluation by the local ethical committee. As this is a study protocol for an observational epidemiological study no intervention was planned. All study participants in the prospective study parts received information material about the study purpose, aims and what will happen with the data collected.

### **Methods/ Design**

**Setting.** In November 2015 the City of Basel had a total of 176'950 inhabitants distributed over 19 urban quarters. An estimated five percent of the population are thought to be infected with influenza viruses annually. The University Hospital Basel and the University Children Hospital Basel are tertiary academic institutions with more than 500'000 adult and 100'000 pediatric outpatient consultations annually. Both hospitals provide emergency department services during influenza seasons. The University Hospital Basel recruited adult patients and the University Children Hospital recruited pediatric patients for this study. In addition, a network of 24 pediatricians and family doctors also recruited patients (see below). Some of the data and samples were received from Viollier, a private laboratory providing its services to a large part of private practices within the City of Basel.



1  
2  
3 181 *Study design.* The observational descriptive study consists of retrospective and prospective  
4 182 parts that are performed at the previously mentioned institutions. **Figure 1** provides an  
5 183 overview on the different study elements.  
6 184

7 185 A. Retrospective Studies:

8 186 *A1. PCR-confirmed influenza cases.*

9 187 For this study part, we collect all PCR-confirmed cases from the laboratory and clinical  
10 188 information systems of the University Hospital Basel, the University Children Hospital, and the  
11 189 Viollier diagnostic laboratory for the influenza seasons 2013/2014 to 2017/2018 with daily  
12 190 resolution. Data from influenza diagnostic services of nasopharyngeal swabs and additional  
13 191 respiratory material is available since 2013. For all PCR-confirmed Influenza A and B cases,  
14 192 further information is accessed e.g. age at infection, gender, and residential address. From  
15 193 the Statistics Office of the Canton Basel-City, additional data on the specific housing block is  
16 194 available e.g. population density, net income, and living space. The cases are mapped and  
17 195 areas with high occurrence identified using kernel densities (see below).  
18 196

19 197 B. Prospective Studies

20 198 *B1. Household survey.*

21 199 We designed a household survey for the influenza season 2015/2016 in order to collect data  
22 200 on influenza-like illness and influenza vaccination. **Figure 2** shows in which urban quarters  
23 201 we distributed 30,000 questionnaires. We chose to study the level of official urban quarters,  
24 202 rather to postcode, as all the data from the Statistics Office of the Canton Basel-City was  
25 203 available at that level. In addition, the areas covered by postcodes and boundaries of official  
26 204 urban quarters do not correspond, making the use of data based on the postcode level  
27 205 unsuitable for the analysis of urban quarters. The distribution of questionnaires started in April  
28 206 2016 when the incidence rate of the influenza cases dropped below official reported endemic  
29 207 threshold levels.  
30 208

31 209 *Participants and sample size.* We used the probability-proportional-to-size (PPS) sampling as  
32 210 a basis to plan the survey, as each quarter's base population varies as well as the systematic  
33 211 equal probability of selection (EPS) sampling method within each quarter, so that each  
34 212 household had an equal probability of being selected. Both sampling methods account for the  
35 213 heterogeneity of urban quarters. In order to gain insights into community variation in attitudes,  
36 214 beliefs and behaviors on influenza vaccination from a representative sample, the survey was  
37 215 distributed in ten selected urban quarters (**Figure 2**) of Basel, which displayed a great variety  
38 216 in terms of socio-demographic and -economic and building structures. Everyone not living in  
39 217 one of the ten selected urban quarters was excluded from the survey.  
40 218

41 219 We calculated the *number of responses needed* (n) to make the data representative with the  
42 220 following equation:  
43 221

$$n \geq \frac{N}{1 + \frac{(N-1)e^2}{K^2V(1-V)}}$$

44 222  
45 223  
46 224 N = Households by urban quarter; e = sampling error 5%; K = 1,96 confidence level  
47 225 (90%=1.64; 95%=1.96; 99%=2.58); V = distribution of responses (50%)  
48  
49  
50  
51  
52  
53  
54  
55  
56  
57  
58  
59  
60



226

We calculate the number of necessary questionnaires to be distributed per quarter by using the amount of responses needed per quarter, assuming a response rate of 12% (**Table 1**). The questionnaire is translated into the six most commonly spoken languages (German, English, Italian, Serbo-Croatian, Albanian, and Turkish). Distribution is according to the three most commonly spoken language per quarter based on data from the Statistics Office of the Canton Basel-City (**Table 2**). Every household received a German questionnaire. The full-length English version of the questionnaire can be found in the online supplementary material (**supplementary material 1**), and a German version in the supplementary material (**supplementary material 2**).

236

*Variables.* A total of 54 questions are included in the survey covering the following topics: (a) Influenza-like illnesses and vaccination, (b) aspects of urban environment, (c) information collection about health, and (d) person related data.

240

*B2. Influenza transmission using whole genome sequencing.*

In this project part, patients with ILI were recruited, and confirmed Influenza viruses are sequenced using WGS (15). This allows us to determine the phylogeny and transmission interference within urban quarters of the city in the context of particular demographic, geographical and microbiological factors.

246

*Participants and recruitment.* All patients with suspected ILI seen at one of the study sites are qualified to participate. The inclusion criteria for ILI are: recent anamnestic fever, coughing, myalgia, arthralgia, and sudden onset of disease. Patients (or parents in the case of children) are informed about the study and asked for a written informed consent. Then respiratory samples, mainly nasopharyngeal swabs, are collected. Patients are recruited at 15 study sites distributed throughout the city. The samples are delivered on the same day to the Clinical Microbiology laboratory for immediate sample processing and PCR testing.

254

*Strain collection and influenza diagnostics.* For the influenza season 2016/2017, all positive and negative samples are collected and stored at -80°C. In addition, additional influenza positive samples from the study season 2016/2017 are provided from a private diagnostic laboratory (Viollier AG, Allschwil, Switzerland). Both laboratories used the FluXpress (Cepheid), which allows the (semi-)quantitative determination of influenza A, influenza B, and respiratory syncytial virus (RSV). Serial isolates from the same patients are also collected and stored until WGS workup.

262

*Additional samples.* In addition to the nasopharyngeal swab for influenza, we also collect the following materials: whole blood (EDTA) samples for analysis of host genetics and serum samples for measurement of HIA titers as previously described (Kaufmann L et al. JOVE 2017) against vaccine and circulating influenza strains.

267

*Additional data.* Patient data from influenza cases were merged with metadata from the Statistics Office of the Canton Basel-City. In addition, the patients were provided with two questionnaires. The first one covers the most recent events during ILI of the last few days, the second one focuses on the behavior while being ill. Patient are instructed to send the second questionnaire two weeks after the ILI episode.

273

1  
2  
3 274 *Whole genome sequencing of viruses.* We use a molecular epidemiological approach to  
4 275 characterize the collected influenza viruses from individual patients with the highest possible  
5 276 resolution. The sequencing procedure has been described in detail (15). Briefly, all samples  
6 277 from ILI patients are analyzed by influenza specific PCRs. PCR-confirmed samples are further  
7 278 processed: first, RNA is extracted from nasopharyngeal swab/fluid; then reverse transcription  
8 279 and PCR is used to amplify all eight RNA viral segments; then PCR products are sequenced  
9 280 with high coverage using a MiSeq system (Illumina).  
10  
11 281

### 12 282 *B3. Determination of herd immunity in health individuals.*

13 283 *Participants and recruitment.* Blood donors from the local Swiss Red Cross blood donation  
14 284 center living in Basel are recruited for this study part. All blood donors included are above the  
15 285 age of 18 years and lived in Basel. At two time-points, before and after the 2016/2017 influenza  
16 286 season, serum samples are provided to determine antibody titers. The time between serum  
17 287 collections was three to nine months. In addition, the vaccine status is documented with a  
18 288 questionnaire.  
19 289

20 290 *Measurement of antibody titers.* Antibody titers are determined as previously described (16).  
21 291 Briefly, antibody titers are determined using the hemagglutination inhibition (HI) assay against  
22 292 the following viruses: Influenza A/Hong Kong/4801/2014 (H3N2); Influenza  
23 293 A/California/7/2009 (H1N1); Influenza B/Brisbane/60/2008; and Influenza  
24 294 B/Phuket/3073/2013. HI titers of  $\geq 1:40$  are considered as seroprotection against this particular  
25 295 virus strain. The predominant virus in the 2016/2017 influenza season is Influenza  
26 296 A/HongKong/H3N2. Within an urban quarter, the seroprotective titer is expressed as  
27 297 percentage of the measured population.  
28  
29  
30  
31  
32  
33  
34

## 35 300 **Quantitative data analyses and modelling**

### 36 301 *A Retrospective study*

37 302 *General aspects of GIS mapping.* By including the spatial environment of the urban districts,  
38 303 the study aims to understand whether spatial spreading patterns of influenza coincide  
39 304 significantly with aspects of the urban environment and/or the socioeconomic structure.  
40 305 Influenza incidences and relevant aspects of the urban environment are visualized in ArcGIS  
41 306 (Esri, Switzerland) and combined with oblique aerial photography of urban quarters that are  
42 307 structured differently in terms of the built environment. GIS-assisted analyses of the spatial  
43 308 distribution and spreading of influenza incidences blended with block level statistical data from  
44 309 the Statistics Office of the Canton Basel-City are designed to determine close contact  
45 310 environments e.g. infrastructure in the quarter, population density, living density, housing  
46 311 density. In addition, we can determine the urban social structure such as age distribution,  
47 312 social life situations, education status, migration background, housing and living  
48 313 arrangements, that may be related to higher occurrences of influenza cases. The possible  
49 314 association between influenza cases and relevant environmental factors are then analyzed  
50 315 with spatial statistics. Thus, it can be determined, for example, if the number of influenza cases  
51 316 is higher in densely built, densely populated areas, and in areas with certain age structures.  
52  
53  
54  
55  
56

57 318 *Data processing, GIS mapping for the Canton Basel-City.* All maps are generated using  
58 319 ArcGIS (Version 10.3). The base-map showing individual statistical blocks/urban  
59 320 quarters/cantonal boundaries was obtained from the "Office for Geoinformatics, City of Basel"  
60 321 (download via Geoshop). It should be noted that, while for the City of Basel, the road network

1  
2  
3 322 defines the boundaries of the statistical blocks in most cases, this is not the case outside the  
4 323 city boundaries. Due to the small size of the individual statistical blocks, their street patterns  
5 324 are not displayed, allowing the presentation of the statistical data as truthfully as possible.  
6 325 ArcGIS allows the georeferencing of individual living addresses by using the tool “Geocode  
7 326 Addresses”. The resulting shapefile indicates each influenza case with an individual point  
8 327 feature which can be classified according to added attributes like influenza type, month or  
9 328 week of examination. However, for data protection and ethical reasons, individual cases are  
10 329 not displayed with the address of residence, but only at the at the statistical block level.  
11  
12  
13 330

14 331 *Kernel densities.* Kernel density estimation is a fundamental data smoothing method where  
15 332 inferences about the population are made, based on a finite data sample. The kernel density  
16 333 tool (ArcGIS) calculates the density of features (here influenza cases) in a certain area and  
17 334 generates a surface for each feature. Then the values of all overlaying kernel surfaces are  
18 335 summed up for each raster cell, resulting in a raster data set showing the kernel density. The  
19 336 kernel density are calculated for the influenza datasets of seasons 2013/2014, 2014/2015,  
20 337 2015/2016, 2016/2017, and 2017/2018, as well as for the influenza cases of all seasons at  
21 338 once. The resulting raster dataset are reclassified into five shares (5 for highest, 1 for lowest  
22 339 values) based on Jenks natural breaks. This raster dataset is then converted into polygon  
23 340 features using the raster-to-feature tool in order to allow more options in terms of cartography  
24 341 (raster datasets can only be displayed in uniform/blank colors; no outlines or hatching  
25 342 possible).  
26  
27  
28  
29 343

#### 30 344 *B1. Household survey*

31 345 The data from the questionnaires is documented in a database (SPSS version 25). A  
32 346 codebook for each variable was determined. Next, we perform a data cleansing, rejecting  
33 347 incompletely filled out questionnaires from the system at entry. Then, a thorough data cleaning  
34 348 and editing process is carried out including harmonization of codes, words and terms given in  
35 349 free answers, and recoding such answers into new codes and labels, thus creating new  
36 350 standardized variables from the original data. This includes identifying incomplete data and  
37 351 assigning missing values, detecting and correcting coarse data or removing inaccurate  
38 352 records from the database. The data cleaning also involves validity checks, i.e. validating and  
39 353 correcting values against a prespecified list of possible options (such as value labels). The  
40 354 coding is checked for each variable for the entire database in respect to the hierarchical order  
41 355 and determine if certain variables should be recoded. As the questionnaires are uniquely  
42 356 identified by urban quarters, and an identification number which is also entered into the data  
43 357 entry mask, we can compare original questionnaire data to data entered in the statistics  
44 358 program and thereby crosscheck cases that seem to be inconsistent with codes used.  
45  
46  
47  
48 359

49 360 *Data classification.* From variables such as date of birth, a new variable is created which  
50 361 defines age groups. From the two variables persons per household and square meters per  
51 362 household, a new variable is created which uses stated square meters per person to give an  
52 363 indication of residential density. Socioeconomic factors of all postal-code districts of the city  
53 364 of Basel will be summarized as counts (medians and interquartile ranges) for continuous  
54 365 variables and proportions and percentages for categorical variables. Responses of all  
55 366 participants will be summarized as counts (medians and interquartile ranges) for continuous  
56 367 variables and proportions and percentages for categorical variables and summarized for each  
57 368 postal-code district.  
58  
59 369

1  
2  
3 370 *Data enhancement and appendices.* The data set is also enhanced by additional information  
4 371 e.g. we analyze the variable of the self-stated medication of the respondents and classified it  
5 372 according to the Anatomical Therapeutic Chemical Classification (ATC) system used by the  
6 373 WHO. Thereby study participants can be classified into a risk group and non-risk group for  
7 374 influenza, according to their ATC-Level. The gained information is entered as new variables.  
8 375 We also include the location of a surveyed person within the urban quarter. This information  
9 376 is obtained from surveyed persons who precisely locate their place of residence on a map or  
10 377 by roughly indicating their location within a grid map of the city that we developed for this  
11 378 purpose. Locations are georeferenced and added to the data set.  
12 379

13 380 *Data quality.* The data cleaning and harmonization procedure yields a data set that is accurate,  
14 381 complete and consistent, that allows us to go back to original source data (questionnaires),  
15 382 accounts for incomplete or missing values, and that conforms with data handling and  
16 383 anonymity requirements required by Swiss data protection laws and the regulations of the  
17 384 Ethics Commissions.  
18 385

#### 19 386 *Data analysis.*

20 387 Various demographic, epidemiological and geographical variables will be compared regarding  
21 388 the outcome variables. The primary outcomes of the household survey are (i) reported ILI and  
22 389 (ii) reported influenza vaccine status. Variables and endpoint data was descriptively analyzed  
23 390 using SPSS (version 25), Stata (version 15.1), and Prism (7.0d, 2017; www.graphpad.com).  
24 391 Data will be shown as median and interquartile ranges for continuous data and absolute  
25 392 numbers and percentage for categorical data. The statistical methods used to estimate an  
26 393 association between the variables are based on studies with similar topics (17-21).  
27 394

#### 28 395 *Analytical analysis.*

29 396 Comparisons between different postal-code areas: Different socioeconomic measures will be  
30 397 compared between the different postal-code districts by chi-square tests (or the Fisher's exact  
31 398 test, when appropriate) for categorical variables and by the Kruskal-Wallis-Test for continuous  
32 399 variables. Summary measures of individual risk factors for influenza will be compared between  
33 400 the different postal-code districts by chi-square tests (or the Fisher's exact test, when  
34 401 appropriate) for categorical variables and by the Kruskal-Wallis-Test for continuous variables.  
35 402 Outcome variables will be compared between the different postal-code districts by chi-square  
36 403 tests (or the Fisher's exact test, when appropriate) for categorical variables and by the Kruskal-  
37 404 Wallis-Test for continuous variables.  
38 405

39 406 Individual risk factors and postal-code district related socioeconomic factors and their  
40 407 associations with ILI: Relative risks for ILI will be estimated by Poisson regression with robust  
41 408 error variance. To deal with possible confounding, all variables found to differ significantly in  
42 409 univariable analyses between participants with and without ILI will be included in the  
43 410 multivariable, multilevel mixed-effects generalized linear model.  
44 411

45 412 Individual risk factors and postal-code district related socioeconomic factors and their  
46 413 associations with influenza-vaccination: Relative risks for influenza vaccination will be  
47 414 estimated by Poisson regression with robust error variance. To deal with possible  
48 415 confounding, all variables found to differ significantly in univariable analyses between  
49 416 participants with and without influenza vaccination will be included in the multivariable,  
50 417 multilevel mixed-effects generalized linear model.



418

419 Model checking: The Pearson and deviance goodness-of-fit tests will be performed to assess  
420 the fit of the data to a Poisson distribution in the final regression models. Furthermore, the  
421 distributions of the deviance residuals will be analysed.

422

423 Sensitivity analyses: The final regression models will be repeated after exclusion of outliers in  
424 the dataset and with changing some of the underlying baseline assumptions (depends on the  
425 variables to be included).

426

427

### 428 *B2. Influenza transmission.*

429 The combined analysis of the viral sequencing data, the metadata from the Statistics Office of  
430 the Canton Basel-City, and the two questionnaires is done using phylodynamic methods. The  
431 data collected in the questionnaires filled out by the patients is cleaned up and processed  
432 analog to the data in B1.

433 In phylodynamics the transmission chain between hosts is reconstructed using the sequenced  
434 influenza genomes. We assume that two hosts with very similar viral genomes are close to  
435 each other in the transmission chain, whereas two hosts, which have very distanced viral  
436 genomes are far apart in the transmission chain. The reconstructed transmission chain is  
437 typically incomplete, as we cannot capture every single case in a city and the direction of  
438 transmission is not fully clear. We employ and extend the available phylodynamic framework  
439 within BEASTv2 (22) to allow the transmission rate to depend on host factors such as age,  
440 family status, or socio-economic characteristics. We aim to quantify the transmission rates as  
441 a function of the host factors. Intuitively, if say many adults cluster in the phylogeny, this  
442 indicates frequent ongoing transmission between adults, while if adults occur in children  
443 clades, this indicates frequent transmission from children to adults.

444

### 445 *B3. Determination of herd immunity in health individuals.*

446 The herd immunity estimates per urban quarter as percentage above a sero-protection  
447 threshold is visualized using GIS mapping as previously described. The distribution of herd  
448 immunities in urban quarters will be correlated with incidence rates of influenza and  
449 transmission patterns.

450

## 451 **Strength & limitations**

452

453 *Retrospective PCR-confirmed influenza cases.* From 2013 to 2018 all available cases are  
454 included. However, the included PCR-confirmed cases do not represent every single influenza  
455 case in the city. Many cases either presented at a family physician not participating in our  
456 study, or did not receive a diagnosis to confirm the viral infections. The number of ILI cases in  
457 the population is estimated to be 4-5% by the Federal Office of Public Health ([www.bag.ch](http://www.bag.ch)) –  
458 this would correspond to between 7000 and 8700 cases in the city of Basel. Based on our  
459 experience from the emergency department, around 50% of ILI cases can be attributed to  
460 Influenza viruses. Therefore, we would expect around 3500 to 4300 PCR-confirmed influenza  
461 cases. To capture every single case of influenza will not be possible.

462

463 *Prospective household survey.* Given the distribution of the foreign-born or persons in the  
464 urban quarter who speak other languages than German (Table 2), the Basel Cantonal  
465 Statistics Office provides the total number of households to be surveyed and the number of

1  
2  
3 466 households that should receive questionnaires in the major foreign languages (Table 3).  
4 467 Nevertheless, a language bias is likely induced into the questionnaire as not every spoken  
5 468 language could be captured with the questionnaire. Data entry and data handling errors can  
6 469 almost be excluded. In population (census) surveys performed by the Federal Office of  
7 470 Statistics of Switzerland, a 6% error margin is usually expected.

8 471 Finally, for logistic and cost reasons, we cannot distribute the household survey to all 19 official  
9 472 urban quarters but focus our questionnaire on 10 selected quarters. Although this might induce  
10 473 a certain selection bias, we feel that the included quarters reflect the diversity similar in a  
11 474 representative number. Also, the questionnaires distributed and received per quarters allows  
12 475 us to perform a statistical representative analysis.  
13 476

14 477 *Prospective study of influenza transmission.* The prospective trial aims to include as many  
15 478 influenza infected patients as possible. The recruitment is distributed at sites with large  
16 479 influenza case numbers. However, recruitment may have introduced a certain bias of study  
17 480 participants. Some patients will not present at a physician or emergency ward and therefore  
18 481 will not be diagnosed but still contribute to the transmission chain. This may be particularly  
19 482 true for children, where PCR-based influenza diagnostics is rarely used.  
20 483

21 484 *Prospective measurement of antibody titers in healthy individuals.* The measurement of herd  
22 485 immunity per quarter is based on the recruitment of healthy blood donors. The study  
23 486 participants may not reflect the average citizen of Basel.  
24 487

## 25 488 **Discussion**

26 489 Profound knowledge on the key geographical, epidemiological and immunological factors  
27 490 influencing influenza transmission in a city will significantly help to develop effective counter  
28 491 measurements. The project is performed during the several subsequent years and large  
29 492 interconnected datasets are collected. The retrospective study parts clearly will show typical  
30 493 bias of a retrospective analysis such as missing data. In the prospective study part, the  
31 494 questionnaire may have a reply bias in the sense that influenza and vaccine interested people  
32 495 are more likely to respond. In addition, during patient recruitment not all influenza cases will  
33 496 be captured by the study. In the prospective study part, we include patients with influenza-like  
34 497 illness and use in a second step a PCR to confirm an influenza infection. However, as with the  
35 498 retrospective study, not all patients with influenza infection can be captured within a city as  
36 499 only symptomatic and patients presenting at the family doctor will be included.  
37 500  
38 501

## 39 502 **Ethics and dissemination**

40 503 The study is approved by the regional ethics committee as observational study (EKNZ project  
41 504 ID 2015–363 and 2016-01735). The study is registered at [clinicaltrials.gov](http://clinicaltrials.gov) (NCT03010007 on  
42 505 22<sup>nd</sup> December 2016). The results of this study will be published in peer-reviewed medical  
43 506 journals.  
44 507

45 508 We plan to present the results of this research project at national and international scientific  
46 509 meetings. We aim to publish our results in open-access journals so they are widely available  
47 510 to interested international audiences. We aim to make our sequencing data available to the  
48 511 research community so that distribution of viruses can be assessed on both a national and  
49 512 international level.  
50 513

1  
2  
3  
4  
5  
6  
7  
8  
9  
10  
11  
12  
13  
14  
15  
16  
17  
18  
19  
20  
21  
22  
23  
24  
25  
26  
27  
28  
29  
30  
31  
32  
33  
34  
35  
36  
37  
38  
39  
40  
41  
42  
43  
44  
45  
46  
47  
48  
49  
50  
51  
52  
53  
54  
55  
56  
57  
58  
59  
60

- 514 **List of abbreviations**
- 515 WGS, whole genome sequencing
- 516 PCR, polymerase chain reaction
- 517 ILI, influenza-like illness
- 518 GIS, geographic information system

For peer review only



1  
2  
3 519 **Tables**  
4  
5  
6  
7  
8  
9  
10  
11  
12  
13  
14  
15  
16  
17  
18  
19  
20  
21  
22  
23  
24  
25  
26  
27  
28  
29  
30  
31  
32  
33  
34  
35  
36  
37  
38  
39  
40  
41  
42  
43  
44  
45  
46  
47  
48  
49  
50  
51  
52  
53  
54  
55  
56  
57  
58  
59  
60

For peer review only

1  
2  
3  
4  
5  
6  
7  
8  
9  
10  
11  
12  
13  
14  
15  
16  
17  
18  
19  
20  
21  
22  
23  
24  
25  
26  
27  
28  
29  
30  
31  
32  
33  
34  
35  
36  
37  
38  
39  
40  
41  
42  
43  
44  
45  
46

**Table 1. Representative sample of the household survey.** <sup>1</sup> The necessary number of questionnaires was calculated with an expected response rate of 12% and, due to statistical calculations, this means more households should have received a questionnaire than there actually are in Kleinhüningen. Source: Population Statistics 2014, Canton Basel-City

| Urban quarter              | No. of private households in the quarter (N) | Minimum required returns (n) | No. of necessary distributed questionnaires (if 12% response rate) |
|----------------------------|----------------------------------------------|------------------------------|--------------------------------------------------------------------|
| Am Ring                    | 5456                                         | 359                          | 2991                                                               |
| Gundeldingen               | 10085                                        | 370                          | 3084                                                               |
| Bruderholz                 | 4038                                         | 351                          | 2924                                                               |
| Bachletten                 | 6710                                         | 363                          | 3028                                                               |
| Gotthelf                   | 3764                                         | 349                          | 2906                                                               |
| Iselin                     | 8860                                         | 368                          | 3069                                                               |
| St. Johann                 | 9180                                         | 369                          | 3073                                                               |
| Matthäus                   | 8012                                         | 367                          | 3055                                                               |
| Klybeck                    | 3506                                         | 346                          | 2886                                                               |
| Kleinhüningen <sup>1</sup> | 1291                                         | 296                          | 2469                                                               |
| Total of 10 urban district | 60902                                        | 3538                         | 29485                                                              |

**Table 2. Distribution of foreign-born population and foreign languages in the urban district of Basel.** Population and foreign-born population were determined for November 2015. Number of private households was determined for 2014. Official language Montenegro: a.o. regional Serbo-Croatian and Albanian; Serbia: Serbo-Croatian; Kosovo: Albanian, Serbo-Croatian, Turkish.

| Urban district | Population    | Number of private households | Foreign born pop. | Foreign population by citizenship as a percentage of all foreigners in the urban quarter (March 2015) |                        |                       |                                    |
|----------------|---------------|------------------------------|-------------------|-------------------------------------------------------------------------------------------------------|------------------------|-----------------------|------------------------------------|
|                |               |                              |                   | Largest segment of the foreign population                                                             | Second largest segment | Third largest segment | Fourth largest segment             |
| Am Ring        | 10666         | 5456                         | 3636              | Germany (27%)                                                                                         | Italy (10.3%)          | Spain (5.9%)          | United Kingdom (4.7%)              |
| Gundeldingen   | 18917         | 10085                        | 7497              | Germany (20.5%)                                                                                       | Turkey (14.9%)         | Italy (12.7%)         | Serbia, Montenegro, Kosovo (9.8%)  |
| Bruderholz     | 9068          | 4038                         | 2098              | Germany (32.6%)                                                                                       | Italy (11.8%)          | UK (7.5%)             | France (5.2%)                      |
| Bachletten     | 13549         | 6710                         | 2918              | Germany (32.3%)                                                                                       | Italy (13.2%)          | Spain (5.2%)          | United Kingdom (4.9%)              |
| Gotthelf       | 6883          | 3764                         | 1910              | Germany (32.2%)                                                                                       | Italy (12.5%)          | Turkey (4.9%)         | Spain (4.9%)                       |
| Iselin         | 16595         | 8860                         | 6092              | Germany (18.3%)                                                                                       | Italy (15%)            | Turkey (12.6%)        | Serbia, Montenegro, Kosovo (7%)    |
| St. Johann     | 18835         | 9180                         | 8245              | Germany (17.2%)                                                                                       | Turkey (12.2%)         | Italy (10.8%)         | Portugal (8.7%)                    |
| Matthäus       | 16303         | 8012                         | 8403              | Germany (17%)                                                                                         | Italy (10.8%)          | Turkey (10.6%)        | Serbia, Montenegro, Kosovo (10.5%) |
| Klybeck        | 7331          | 3506                         | 3813              | Turkey (16.7%)                                                                                        | Italy (15.5%)          | Germany (11.3%)       | Serbia, Montenegro, Kosovo (10.9%) |
| Kleinhüningen  | 2900          | 1291                         | 1553              | Italy (15.7%)                                                                                         | Germany (14.5%)        | Turkey (14.3%)        | Serbia, Montenegro, Kosovo (10.5%) |
| <b>Total</b>   | <b>121047</b> | <b>60902</b>                 | <b>46165</b>      |                                                                                                       |                        |                       |                                    |

1  
2  
3  
4  
5  
6  
7  
8  
9  
10  
11  
12  
13  
14  
15  
16  
17  
18  
19  
20  
21  
22  
23  
24  
25  
26  
27  
28  
29  
30  
31  
32  
33  
34  
35  
36  
37  
38  
39  
40  
41  
42  
43  
44  
45  
46

**Table 3. Number of households to be surveyed in selected urban quarters and languages provided.**

|               | Number of private households | Questionnaires needed when return rate 12% | German, English, Italian | Serbo-Croatian | Albanian | Turkish | Household questionnaire ratio | / Distribution Each household | Every other household | Every third household |
|---------------|------------------------------|--------------------------------------------|--------------------------|----------------|----------|---------|-------------------------------|-------------------------------|-----------------------|-----------------------|
| Kleinhüningen | 1291                         | 2469                                       | x                        | x              | x        | x       | 0,52                          | x                             |                       |                       |
| Klybeck       | 3506                         | 2886                                       | x                        | x              | x        | x       | 1,21                          | x                             |                       |                       |
| Matthäus      | 8012                         | 3055                                       | x                        | x              | x        | x       | 2,62                          |                               | x                     |                       |
| St. Johann    | 9180                         | 3073                                       | x                        |                |          | x       | 2,99                          |                               |                       | x                     |
| Iselin        | 8860                         | 3069                                       | x                        | x              | x        | x       | 2,89                          |                               |                       | x                     |
| Gotthelf      | 3764                         | 2906                                       | x                        |                |          |         | 1,30                          | x                             |                       |                       |
| Am Ring       | 5456                         | 2991                                       | x                        |                |          |         | 1,82                          |                               | x                     |                       |
| Bachletten    | 6710                         | 3028                                       | x                        |                |          |         | 2,22                          |                               | x                     |                       |
| Gundeldingen  | 10085                        | 3084                                       | x                        | x              | x        | x       | 3,27                          |                               |                       | x                     |
| Bruderholz    | 4038                         | 2924                                       | x                        |                |          |         | 1,38                          | x                             |                       |                       |
| Total         |                              |                                            | 29485                    | 14563          | 14563    | 20542   |                               |                               |                       |                       |

## Figures

### Figure legends

**Figure 1. Study overview.** Retrospective analysis of PCR-confirmed cases and household survey. Prospective collection of influenza virus isolates for WGS analysis and measurement of hemagglutination inhibition assay (HIA) titers from serum of healthy donors.

**Figure 2. Urban quarters of the Canton of Basel-City included into the household survey.** The 10 selected urban quarters are highlighted, selected on influenza incidences and known socioeconomic differences. Base map data: Department of construction and traffic of the Canton Basel-City, land charge register, specialist department for geoinformatics.

1  
2  
3  
4  
5  
6  
7  
8  
9  
10  
11  
12  
13  
14  
15  
16  
17  
18  
19  
20  
21  
22  
23  
24  
25  
26  
27  
28  
29  
30  
31  
32  
33  
34  
35  
36  
37  
38  
39  
40  
41  
42  
43  
44  
45  
46  
47  
48  
49  
50  
51  
52  
53  
54  
55  
56  
57  
58  
59  
60

**Figure 1.**

For peer review only

1  
2  
3 **Figure 2.**  
4  
5  
6  
7  
8  
9  
10  
11  
12  
13  
14  
15  
16  
17  
18  
19  
20  
21  
22  
23  
24  
25  
26  
27  
28  
29  
30  
31  
32  
33  
34  
35  
36  
37  
38  
39  
40  
41  
42  
43  
44  
45  
46  
47  
48  
49  
50  
51  
52  
53  
54  
55  
56  
57  
58  
59  
60

For peer review only



## Declarations

*Ethics approval and consent to participate:* The study is approved by the regional ethical review board (Project-ID 2015–363 and 2016-01735).

*Consent for publication:* Written informed consent is provided by every patient or legal representative.

*Availability of data and material:* Data analysis is ongoing, however, we will publish all WGS data of the patient in public repositories for WGS data. Data sharing is not applicable to this article as no datasets were generated or analyzed during the current study.

*Competing interests:* None

*Funding:* This work is supported by the Swiss National Science Foundation (interdisciplinary research grant CR3213\_166258/1; www.snsf.ch) and a grant by the Freiwillige Akademische Gesellschaft, Basel (www.fag.ch). AE received a salary grant by the Swiss National Science Foundation (Ambizione PZ00P3\_154709 /1).

*Author contributions:* AE, MB, RSS and TS planned the study and reviewed the paper. AE drafted the first version paper. DW, DMM, and HMBSS advised on sequencing methodology. DW, HMBSS, TS, and NM advised on phylogenetic analysis and reviewed the paper. NA, MB, JB (Geography) generate GIS maps. AE, DB, YH, ER, OD, MN, AZ, STS, CHN, AB, NR, and NM provide data and samples. AE, NG, CS, TV, RSS planned and conducted the questionnaire. DV, DL, MS organized biobanking, CS, MB, TV, MS, NG, NAS, TS, RSS performed data entry.

## Acknowledgements

We would like to thank the clinical trial unit (Karin Wild and Silke Puschke) for organizational help with the prospective study part.

Finally, we thank the family doctors for helping in the patient recruitment:

- Dr. Schneider and Dr. von Hornstein, Gundeldingen
- Gemeinschaftspraxis Dornacherstrasse, Gundeldingen (Dres. Bruger, Eggenschwilder, Wyss Lustenberger, Gessler, Nonnemacher)
- Praxisgemeinschaft Bruderholz (Dres. Dreyfus and Gürke), Bruderholz
- Dr. Marti, Bachletten
- Praxis Büdnerhof (Dres Müller, Peters and Hantke), Büdnerhof
- Dr. Banderet and Dr. Malè, Iselin
- Dres. Legendre and Legendre, St. Johann
- Davidsbodenpraxis (Dres. Hug and Isay-Utzinger), St. Johann
- Praxis Dr. Bär (Dres. Bär and Türkoglu), St. Johann
- Hammerpraxis (Prof. Zeller), Matthäus
- Dr. Gordon and Dr. Landolt, Clara
- Dr. Buess, Am Ring

**References:**

1. Stockton J, Ellis JS, Saville M, Clewley JP, Zambon MC. Multiplex PCR for typing and subtyping influenza and respiratory syncytial viruses. *J Clin Microbiol.* 1998;36(10):2990-5.
2. Thai PQ, Mai le Q, Welkers MR, Hang Nle K, Thanh le T, Dung VT, et al. Pandemic H1N1 virus transmission and shedding dynamics in index case households of a prospective Vietnamese cohort. *J Infect.* 2014;68(6):581-90.
3. Ziegler T, Hall H, Sanchez-Fauquier A, Gamble WC, Cox NJ. Type- and subtype-specific detection of influenza viruses in clinical specimens by rapid culture assay. *J Clin Microbiol.* 1995;33(2):318-21.
4. McCrone JT, Woods RJ, Martin ET, Malosh RE, Monto AS, Luring AS. Stochastic processes constrain the within and between host evolution of influenza virus. *Elife.* 2018;7.
5. Houghton R, Ellis J, Galiano M, Clark TW, Wyllie S. Haemagglutinin and neuraminidase sequencing delineate nosocomial influenza outbreaks with accuracy equivalent to whole genome sequencing. *J Infect.* 2017;74(4):377-84.
6. Pagani L, Thomas Y, Huttner B, Sauvan V, Notaridis G, Kaiser L, et al. Transmission and effect of multiple clusters of seasonal influenza in a Swiss geriatric hospital. *J Am Geriatr Soc.* 2015;63(4):739-44.
7. Valley-Omar Z, Nindo F, Mudau M, Hsiao M, Martin DP. Phylogenetic Exploration of Nosocomial Transmission Chains of 2009 Influenza A/H1N1 among Children Admitted at Red Cross War Memorial Children's Hospital, Cape Town, South Africa in 2011. *PLoS One.* 2015;10(11):e0141744.
8. Virk RK, Gunalan V, Lee HK, Inoue M, Chua C, Tan BH, et al. Molecular Evidence of Transmission of Influenza A/H1N1 2009 on a University Campus. *PLoS One.* 2017;12(1):e0168596.
9. Ghedin E, Sengamalay NA, Shumway M, Zaborsky J, Feldblyum T, Subbu V, et al. Large-scale sequencing of human influenza reveals the dynamic nature of viral genome evolution. *Nature.* 2005;437(7062):1162-6.
10. Bloom-Feshbach K, Alonso WJ, Charu V, Tamerius J, Simonsen L, Miller MA, et al. Latitudinal variations in seasonal activity of influenza and respiratory syncytial virus (RSV): a global comparative review. *PLoS One.* 2013;8(2):e54445.
11. Sammon CJ, McGrogan A, Snowball J, de Vries CS. Factors associated with uptake of seasonal and pandemic influenza vaccine among clinical risk groups in the UK: an analysis using the General Practice Research Database. *Vaccine.* 2012;30(14):2483-9.
12. Tamerius JD, Shaman J, Alonso WJ, Bloom-Feshbach K, Uejio CK, Comrie A, et al. Environmental predictors of seasonal influenza epidemics across temperate and tropical climates. *PLoS Pathog.* 2013;9(3):e1003194.
13. Walter D, Bohmer MM, Heiden M, Reiter S, Krause G, Wichmann O. Monitoring pandemic influenza A(H1N1) vaccination coverage in Germany 2009/10 - results from thirteen consecutive cross-sectional surveys. *Vaccine.* 2011;29(23):4008-12.
14. Yu H, Alonso WJ, Feng L, Tan Y, Shu Y, Yang W, et al. Characterization of regional influenza seasonality patterns in China and implications for vaccination strategies: spatio-temporal modeling of surveillance data. *PLoS Med.* 2013;10(11):e1001552.

- 1  
2  
3  
4  
5  
6  
7  
8  
9  
10  
11  
12  
13  
14  
15  
16  
17  
18  
19  
20  
21  
22  
23  
24  
25  
26  
27  
28  
29  
30  
31  
32  
33  
34  
35  
36  
37  
38  
39  
40  
41  
42  
43  
44  
45  
46  
47  
48  
49  
50  
51  
52  
53  
54  
55  
56  
57  
58  
59  
60
15. Wuthrich D, Lang D, Muller NF, Neher RA, Stadler T, Egli A. Evaluation of two workflows for whole genome sequencing-based typing of influenza A viruses. *J Virol Methods*. 2019;266:30-3.
  16. Kaufmann L, Syedbasha M, Vogt D, Hollenstein Y, Hartmann J, Linnik JE, et al. An Optimized Hemagglutination Inhibition (HI) Assay to Quantify Influenza-specific Antibody Titers. *J Vis Exp*. 2017(130).
  17. Vaux S, Van Cauteren D, Guthmann JP, Le Strat Y, Vaillant V, de Valk H, et al. Influenza vaccination coverage against seasonal and pandemic influenza and their determinants in France: a cross-sectional survey. *BMC Public Health*. 2011;11:30.
  18. Raude J, Setbon M. Predicting the lay preventive strategies in response to avian influenza from perceptions of the threat. *PLoS One*. 2011;6(9):e24943.
  19. Bohmer MM, Walter D, Muters S, Krause G, Wichmann O. Seasonal influenza vaccine uptake in Germany 2007/2008 and 2008/2009: results from a national health update survey. *Vaccine*. 2011;29(27):4492-8.
  20. Bohmer MM, Walter D, Krause G, Muters S, Gosswald A, Wichmann O. Determinants of tetanus and seasonal influenza vaccine uptake in adults living in Germany. *Hum Vaccin*. 2011;7(12):1317-25.
  21. Dunlop S, Coyte PC, McIsaac W. Socio-economic status and the utilisation of physicians' services: results from the Canadian National Population Health Survey. *Social Science & Medicine*. 2000;51:123-33.
  22. Bouckaert R, Heled J, Kuhnert D, Vaughan T, Wu CH, Xie D, et al. BEAST 2: a software platform for Bayesian evolutionary analysis. *PLoS Comput Biol*. 2014;10(4):e1003537.

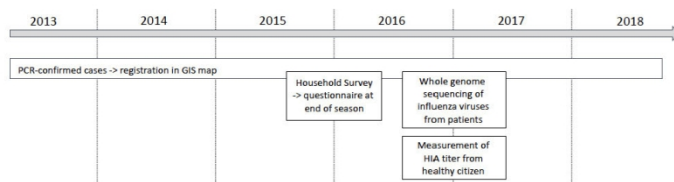

Figure 1. Study overview. Retrospective analysis of PCR-confirmed cases and household survey. Prospective collection of influenza virus isolates for WGS analysis and measurement of hemagglutination inhibition assay (HIA) titers from serum of healthy donors.

338x190mm (108 x 90 DPI)

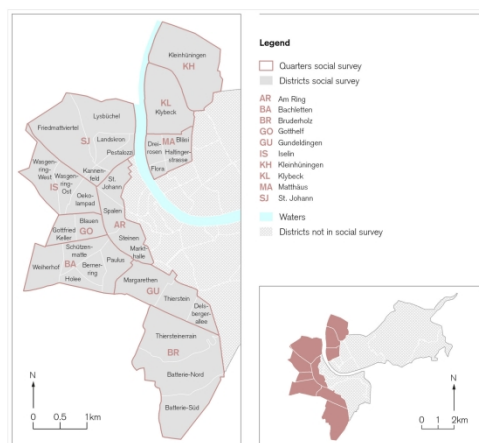

Figure 2. Urban quarters of the Canton of Basel-City included into the household survey. The 10 selected urban quarters are highlighted, selected on influenza incidences and known socioeconomic differences. Base map data: Department of construction and traffic of the Canton Basel-City, land charge register, specialist department for geoinformatics.

338x190mm (300 x 300 DPI)

## Befragung zu Grippeerkrankungen in der Stadt Basel

Im Rahmen eines Forschungsprojekts zu Grippeerkrankungen in der Stadt Basel führen wir eine Befragung in ausgewählten Basler Quartieren durch.

Die Teilnahme an der Umfrage dauert circa 15 Minuten und ist freiwillig. Ihre Anonymität wird gewährleistet. Wir bitten Sie, diese Broschüre mit Ihrem ausgefüllten Fragebogen bis zum 1. Mai 2016 mit dem vorfrankierten Rückumschlag zurückzusenden.

Teilnehmende Personen können an einem Gewinnspiel teilnehmen (**Apple Laptop im Wert von CHF 2500.- und zwei Pro Innerstadt-Gutscheine im Wert von je CHF 500.-**). Siehe Ende des Fragebogens. Vielen Dank für Ihre Mitwirkung.

### A. Grippe und Erkältung

#### A.1. Waren Sie in diesem Winter oder Frühling stark erkältet?

- <sub>1</sub> nein (falls nein, bitte weiter mit Frage A6)    <sub>2</sub> ja, mehrfach    <sub>3</sub> ja, einmal  
 Falls ja, in welchem/n Monat(en): \_\_\_\_\_  
 Falls ja, wie viele Tage waren Sie dadurch im Alltag deutlich eingeschränkt? \_\_\_\_\_

#### A.2. Welche Beschwerden hatten Sie? (Mehrfachnennungen möglich)

- <sub>1</sub> Fieber (über 38 Grad)    <sub>3</sub> Muskel- und Gliederschmerzen    <sub>5</sub> Husten    <sub>7</sub> Halsschmerzen    <sub>9</sub> laufende Nase  
<sub>2</sub> Durchfall    <sub>4</sub> starke Müdigkeit    <sub>6</sub> Kopfschmerzen    <sub>8</sub> starkes Krankheitsgefühl

#### A.3. Ist sonst noch jemand mit den gleichen Beschwerden (Grippe/Erkältung) in Ihrem näheren Umfeld krank gewesen?

- <sub>1</sub> nein    <sub>2</sub> ja    <sub>3</sub> weiss nicht  
 Falls ja, Personen (Mehrfachnennungen möglich):  
<sub>1</sub> in der Familie    <sub>2</sub> bei der Arbeit    <sub>3</sub> in der Nachbarschaft    <sub>4</sub> im Freundeskreis    <sub>5</sub> im Verein

#### A.4. Haben Sie wegen der Erkältungs-Beschwerden eine Fachperson aufgesucht?

- <sub>1</sub> nein    <sub>2</sub> ja  
 Falls ja, wo?  
<sub>1</sub> Arztpraxis    <sub>2</sub> Spital    <sub>3</sub> Apotheke    <sub>4</sub> andere, und zwar: \_\_\_\_\_

#### A.5. Haben Sie zur Behandlung der Erkältung Medikamente eingenommen?

- <sub>1</sub> nein    <sub>2</sub> ja  
 Falls ja, haben Sie Tamiflu erhalten?  
<sub>1</sub> ja    <sub>2</sub> nein

#### A.6. Haben Sie sich im Herbst/Winter 2015/16 gegen Grippe impfen lassen?

- <sub>1</sub> nein    <sub>2</sub> ja  
 Falls ja, wo:    <sub>1</sub> Arztpraxis    <sub>2</sub> Apotheke    <sub>3</sub> Spital    <sub>4</sub> woanders, und zwar: \_\_\_\_\_  
 Falls ja, in welchem Monat? \_\_\_\_\_

Falls nein: Warum haben Sie sich nicht geimpft? (Bitte kreuzen Sie alle relevanten Punkte an)

- <sub>1</sub> Ich weiss nicht, warum ich mich impfen lassen sollte.    <sub>7</sub> Freunde/Angehörige haben schlechte Erfahrungen damit gemacht.  
<sub>2</sub> Ich wollte eigentlich, aber habe es dann doch nicht getan.    <sub>8</sub> Ich scheue mich vor den Nebenwirkungen.  
<sub>3</sub> Ich glaube nicht an die Wirkung der Impfung.    <sub>9</sub> Spritzen sind mir unangenehm.  
<sub>4</sub> Eine richtige Grippe stärkt mein Immunsystem mehr und der Schutz hält länger.    <sub>10</sub> Die Impfung wurde mir von Fachpersonen (Arzt/Apotheker) nicht empfohlen.  
<sub>5</sub> Das ist mir zu teuer.    <sub>11</sub> Anderer Grund, und zwar: \_\_\_\_\_  
<sub>6</sub> Ich stärke meine Abwehr mit anderen Mitteln.

Falls ja: Warum haben Sie sich geimpft? (Bitte kreuzen Sie alle relevanten Punkte an)

- <sub>1</sub> Ich möchte keine Grippe bekommen.    <sub>4</sub> Die Impfung wurde mir von Angehörigen/Freunden empfohlen.  
<sub>2</sub> Ich möchte nicht bei der Arbeit fehlen.    <sub>5</sub> Die Impfung wurde mir am Arbeitsplatz empfohlen.  
<sub>3</sub> Ich habe Freunde/Angehörige, die ich vor der Grippe schützen möchte.    <sub>6</sub> Die Impfung wurde mir von Fachpersonen (Arzt/Apotheker) empfohlen.  
<sub>7</sub> Anderer Grund, und zwar: \_\_\_\_\_

**A.7. Falls Sie sich dieses Jahr gegen Grippe geimpft haben, geben Sie Ihre Erfahrungen auf einer Skala von 1 (sehr negativ) bis 10 (sehr positiv) an:**

<sub>1</sub> 1    <sub>2</sub> 2    <sub>3</sub> 3    <sub>4</sub> 4    <sub>5</sub> 5    <sub>6</sub> 6    <sub>7</sub> 7    <sub>8</sub> 8    <sub>9</sub> 9    <sub>10</sub> 10  
sehr negativ sehr positiv

Falls **positive** Erfahrungen, welche: \_\_\_\_\_

Falls **negative** Erfahrungen, welche: \_\_\_\_\_

**A.8. Lassen Sie sich regelmässig gegen Grippe impfen?**

<sub>1</sub> nein    <sub>2</sub> ja  
Falls ja, seit wie vielen Jahren: \_\_\_\_\_

**A.9. Haben Sie in der Vergangenheit andere vom Arzt empfohlene Impfungen für sich selbst oder für Ihre Kinder abgelehnt?**

<sub>1</sub> nein, nie    <sub>2</sub> ja, aber nur gewisse Impfungen    <sub>3</sub> ja, alle Impfungen

**A.10. Wie schätzen Sie Ihren allgemeinen Gesundheitszustand auf einer Skala von 1 (sehr negativ) bis 10 (sehr positiv) ein?**

<sub>1</sub> 1    <sub>2</sub> 2    <sub>3</sub> 3    <sub>4</sub> 4    <sub>5</sub> 5    <sub>6</sub> 6    <sub>7</sub> 7    <sub>8</sub> 8    <sub>9</sub> 9    <sub>10</sub> 10  
sehr negativ sehr positiv

**A.11. Haben Sie eine Hausärztin oder einen Hausarzt?**

<sub>1</sub> nein    <sub>2</sub> ja

**A.12. Haben Sie chronische Krankheiten, wegen denen Sie täglich Medikamente einnehmen müssen (mindestens seit 6 Monaten)?**

<sub>1</sub> nein    <sub>2</sub> ja  
Falls ja, welche Medikamente: \_\_\_\_\_

**A.13. Rauchen Sie?**

<sub>1</sub> nein    <sub>2</sub> ja, gelegentlich    <sub>3</sub> ja, täglich (Anzahl Päckchen pro Tag) \_\_\_\_\_    <sub>4</sub> keine Angabe

**A.14. Trinken Sie Alkohol?**

<sub>1</sub> nein    <sub>2</sub> ja, gelegentlich    <sub>3</sub> ja, täglich    <sub>4</sub> keine Angabe

**A.15. Für wie wichtig halten Sie folgende Massnahmen um einer Grippe vorzubeugen?**

|                                    | wichtig                               | eher wichtig                          | neutral                               | eher unwichtig                        | unwichtig                             | weiss nicht                           | keine Angabe                          |
|------------------------------------|---------------------------------------|---------------------------------------|---------------------------------------|---------------------------------------|---------------------------------------|---------------------------------------|---------------------------------------|
| Impfen                             | <input type="checkbox"/> <sub>1</sub> | <input type="checkbox"/> <sub>2</sub> | <input type="checkbox"/> <sub>3</sub> | <input type="checkbox"/> <sub>4</sub> | <input type="checkbox"/> <sub>5</sub> | <input type="checkbox"/> <sub>6</sub> | <input type="checkbox"/> <sub>7</sub> |
| Händewaschen                       | <input type="checkbox"/> <sub>1</sub> | <input type="checkbox"/> <sub>2</sub> | <input type="checkbox"/> <sub>3</sub> | <input type="checkbox"/> <sub>4</sub> | <input type="checkbox"/> <sub>5</sub> | <input type="checkbox"/> <sub>6</sub> | <input type="checkbox"/> <sub>7</sub> |
| Gesundheits-Checkup beim Arzt      | <input type="checkbox"/> <sub>1</sub> | <input type="checkbox"/> <sub>2</sub> | <input type="checkbox"/> <sub>3</sub> | <input type="checkbox"/> <sub>4</sub> | <input type="checkbox"/> <sub>5</sub> | <input type="checkbox"/> <sub>6</sub> | <input type="checkbox"/> <sub>7</sub> |
| Gesunde Ernährung                  | <input type="checkbox"/> <sub>1</sub> | <input type="checkbox"/> <sub>2</sub> | <input type="checkbox"/> <sub>3</sub> | <input type="checkbox"/> <sub>4</sub> | <input type="checkbox"/> <sub>5</sub> | <input type="checkbox"/> <sub>6</sub> | <input type="checkbox"/> <sub>7</sub> |
| Regelmässige körperliche Aktivität | <input type="checkbox"/> <sub>1</sub> | <input type="checkbox"/> <sub>2</sub> | <input type="checkbox"/> <sub>3</sub> | <input type="checkbox"/> <sub>4</sub> | <input type="checkbox"/> <sub>5</sub> | <input type="checkbox"/> <sub>6</sub> | <input type="checkbox"/> <sub>7</sub> |
| Sonstige                           | <input type="checkbox"/> <sub>1</sub> | <input type="checkbox"/> <sub>2</sub> | <input type="checkbox"/> <sub>3</sub> | <input type="checkbox"/> <sub>4</sub> | <input type="checkbox"/> <sub>5</sub> | <input type="checkbox"/> <sub>6</sub> | <input type="checkbox"/> <sub>7</sub> |

sonstige, und zwar: \_\_\_\_\_

**A.16. Wie gut setzen Sie folgende Massnahmen Ihrer Meinung nach im Alltag um?**

|                                    | sehr gut                              | gut                                   | mittelmässig                          | schlecht                              | sehr schlecht                         | weiss nicht                           | keine Angabe                          |
|------------------------------------|---------------------------------------|---------------------------------------|---------------------------------------|---------------------------------------|---------------------------------------|---------------------------------------|---------------------------------------|
| Impfen                             | <input type="checkbox"/> <sub>1</sub> | <input type="checkbox"/> <sub>2</sub> | <input type="checkbox"/> <sub>3</sub> | <input type="checkbox"/> <sub>4</sub> | <input type="checkbox"/> <sub>5</sub> | <input type="checkbox"/> <sub>6</sub> | <input type="checkbox"/> <sub>7</sub> |
| Händewaschen                       | <input type="checkbox"/> <sub>1</sub> | <input type="checkbox"/> <sub>2</sub> | <input type="checkbox"/> <sub>3</sub> | <input type="checkbox"/> <sub>4</sub> | <input type="checkbox"/> <sub>5</sub> | <input type="checkbox"/> <sub>6</sub> | <input type="checkbox"/> <sub>7</sub> |
| Gesundheits-Checkup beim Arzt      | <input type="checkbox"/> <sub>1</sub> | <input type="checkbox"/> <sub>2</sub> | <input type="checkbox"/> <sub>3</sub> | <input type="checkbox"/> <sub>4</sub> | <input type="checkbox"/> <sub>5</sub> | <input type="checkbox"/> <sub>6</sub> | <input type="checkbox"/> <sub>7</sub> |
| Gesunde Ernährung                  | <input type="checkbox"/> <sub>1</sub> | <input type="checkbox"/> <sub>2</sub> | <input type="checkbox"/> <sub>3</sub> | <input type="checkbox"/> <sub>4</sub> | <input type="checkbox"/> <sub>5</sub> | <input type="checkbox"/> <sub>6</sub> | <input type="checkbox"/> <sub>7</sub> |
| Regelmässige körperliche Aktivität | <input type="checkbox"/> <sub>1</sub> | <input type="checkbox"/> <sub>2</sub> | <input type="checkbox"/> <sub>3</sub> | <input type="checkbox"/> <sub>4</sub> | <input type="checkbox"/> <sub>5</sub> | <input type="checkbox"/> <sub>6</sub> | <input type="checkbox"/> <sub>7</sub> |
| Sonstige                           | <input type="checkbox"/> <sub>1</sub> | <input type="checkbox"/> <sub>2</sub> | <input type="checkbox"/> <sub>3</sub> | <input type="checkbox"/> <sub>4</sub> | <input type="checkbox"/> <sub>5</sub> | <input type="checkbox"/> <sub>6</sub> | <input type="checkbox"/> <sub>7</sub> |



## B. Aspekte der städtischen Umwelt

### B.1. Wie oft benutzen Sie die folgenden Verkehrsmittel?

|                                              | täglich                    | mehrmals die Woche         | mehrmals im Monat          | seltener                   | nie                        | weiss nicht                | keine Angabe               |
|----------------------------------------------|----------------------------|----------------------------|----------------------------|----------------------------|----------------------------|----------------------------|----------------------------|
| Auto, Motorrad, Roller                       | <input type="checkbox"/> 1 | <input type="checkbox"/> 2 | <input type="checkbox"/> 3 | <input type="checkbox"/> 4 | <input type="checkbox"/> 5 | <input type="checkbox"/> 6 | <input type="checkbox"/> 7 |
| Öffentliche Verkehrsmittel (Bus, Tram, Bahn) | <input type="checkbox"/> 1 | <input type="checkbox"/> 2 | <input type="checkbox"/> 3 | <input type="checkbox"/> 4 | <input type="checkbox"/> 5 | <input type="checkbox"/> 6 | <input type="checkbox"/> 7 |
| Fahrrad                                      | <input type="checkbox"/> 1 | <input type="checkbox"/> 2 | <input type="checkbox"/> 3 | <input type="checkbox"/> 4 | <input type="checkbox"/> 5 | <input type="checkbox"/> 6 | <input type="checkbox"/> 7 |
| zu Fuss                                      | <input type="checkbox"/> 1 | <input type="checkbox"/> 2 | <input type="checkbox"/> 3 | <input type="checkbox"/> 4 | <input type="checkbox"/> 5 | <input type="checkbox"/> 6 | <input type="checkbox"/> 7 |
| anderes                                      | <input type="checkbox"/> 1 | <input type="checkbox"/> 2 | <input type="checkbox"/> 3 | <input type="checkbox"/> 4 | <input type="checkbox"/> 5 | <input type="checkbox"/> 6 | <input type="checkbox"/> 7 |

anderes, und zwar: \_\_\_\_\_

### B.2. Wie oft unternehmen Sie folgende Aktivitäten?

|                                                   | täglich                    | mehrmals die Woche         | mehrmals im Monat          | seltener                   | nie                        | weiss nicht                | keine Angabe               |
|---------------------------------------------------|----------------------------|----------------------------|----------------------------|----------------------------|----------------------------|----------------------------|----------------------------|
| Einkaufen in Einkaufshäusern (Coop, Migros, etc.) | <input type="checkbox"/> 1 | <input type="checkbox"/> 2 | <input type="checkbox"/> 3 | <input type="checkbox"/> 4 | <input type="checkbox"/> 5 | <input type="checkbox"/> 6 | <input type="checkbox"/> 7 |
| Kino                                              | <input type="checkbox"/> 1 | <input type="checkbox"/> 2 | <input type="checkbox"/> 3 | <input type="checkbox"/> 4 | <input type="checkbox"/> 5 | <input type="checkbox"/> 6 | <input type="checkbox"/> 7 |
| Restaurant/ Café/ Bar                             | <input type="checkbox"/> 1 | <input type="checkbox"/> 2 | <input type="checkbox"/> 3 | <input type="checkbox"/> 4 | <input type="checkbox"/> 5 | <input type="checkbox"/> 6 | <input type="checkbox"/> 7 |
| Kulturelle Veranstaltungen                        | <input type="checkbox"/> 1 | <input type="checkbox"/> 2 | <input type="checkbox"/> 3 | <input type="checkbox"/> 4 | <input type="checkbox"/> 5 | <input type="checkbox"/> 6 | <input type="checkbox"/> 7 |
| Sportveranstaltungen/spiele                       | <input type="checkbox"/> 1 | <input type="checkbox"/> 2 | <input type="checkbox"/> 3 | <input type="checkbox"/> 4 | <input type="checkbox"/> 5 | <input type="checkbox"/> 6 | <input type="checkbox"/> 7 |

### B.3. Mit wie vielen Personen haben Sie an einem regulären Wochentag schätzungsweise Kontakt (Arbeitsumfeld, Familie, Freunde, Vereine)?

1 0-10      2 10-50      3 50-100      4 mehr als 100

### B.4. Falls Sie erwerbstätig sind, haben Sie bei Ihrer Arbeit häufigen Kontakt mit anderen Menschen?

1 nein      2 ja      3 keine Angabe

### B.5. Arbeiten Sie im Gesundheitswesen mit Patientenkontakt (Medizinal- oder Pflegefachperson)?

1 nein      2 ja      3 keine Angabe

### B.6. Arbeiten Sie mit Kindern (Kindergarten, Spielgruppe, Kindertagesstätte, Schule etc.)?

1 nein      2 ja      3 keine Angabe

### B.7. Befindet sich Ihr Arbeitsplatz in einem Grossraumbüro bzw. in einem Raum mit vielen Menschen?

1 nein      2 ja      3 keine Angabe

### B.8. Fühlen Sie sich in Ihrem Wohnumfeld schädlichen Umwelteinflüssen ausgesetzt? (zum Beispiel: Abgase, Feinstaub, Elektromog, Lärm etc.)

1 nein      2 ja      3 keine Angabe

Wenn ja, welchen: \_\_\_\_\_

### B.9. Haben Sie diesen Herbst/Winter Personen im Spital oder Altersheim besucht?

1 nein      2 ja  
 Wenn ja, wie oft:  
1 1-4 mal      2 mehr als 5mal      3 Ich besuche regelmässig Personen in Gesundheitseinrichtungen.

### B.10. Betreuen Sie regelmässig pflegebedürftige Angehörige zu Hause?

1 nein      2 ja

### B.11. Leben Sie mit Personen zusammen, die an einer chronischen Erkrankung leiden?

1 nein      2 ja

## C. Informationsbeschaffung über Gesundheitsfragen

### C.1. Woher beziehen Sie Ihre Informationen zu Gesundheitsthemen? (Mehrfachnennungen möglich)

- <sub>1</sub> Ärztin / Arzt  
<sub>2</sub> Apotheke  
<sub>3</sub> Soziales Umfeld (Freunde, Bekannte, Familie etc.)  
<sub>4</sub> Religiös-kulturelles Umfeld  
<sub>5</sub> Andere Informationsquelle und zwar: \_\_\_\_\_  
<sub>6</sub> TV  
<sub>7</sub> Radio  
<sub>8</sub> Zeitungen und Zeitschriften  
<sub>9</sub> Soziale Netzwerke  
<sub>10</sub> Internet, und zwar:  
<sub>11</sub> über Erfahrungsberichte anderer Personen  
<sub>12</sub> über offizielle Webseiten (Bundesamt für Gesundheit, Spital)  
<sub>13</sub> über andere Seiten: \_\_\_\_\_  
<sub>14</sub> Ich informiere mich nicht.

### C.2. Wie hilfreich finden Sie die angebotenen Informationen?

|                                                   | sehr<br>hilfreich                     | hilfreich                             | mittel                                | weniger<br>hilfreich                  | gar nicht<br>hilfreich                | weiss nicht                           | keine<br>Angabe                       |
|---------------------------------------------------|---------------------------------------|---------------------------------------|---------------------------------------|---------------------------------------|---------------------------------------|---------------------------------------|---------------------------------------|
| Ärztin / Arzt                                     | <input type="checkbox"/> <sub>1</sub> | <input type="checkbox"/> <sub>2</sub> | <input type="checkbox"/> <sub>3</sub> | <input type="checkbox"/> <sub>4</sub> | <input type="checkbox"/> <sub>5</sub> | <input type="checkbox"/> <sub>6</sub> | <input type="checkbox"/> <sub>7</sub> |
| Apotheke                                          | <input type="checkbox"/> <sub>1</sub> | <input type="checkbox"/> <sub>2</sub> | <input type="checkbox"/> <sub>3</sub> | <input type="checkbox"/> <sub>4</sub> | <input type="checkbox"/> <sub>5</sub> | <input type="checkbox"/> <sub>6</sub> | <input type="checkbox"/> <sub>7</sub> |
| Soziales Umfeld (Freunde, Bekannte, Familie etc.) | <input type="checkbox"/> <sub>1</sub> | <input type="checkbox"/> <sub>2</sub> | <input type="checkbox"/> <sub>3</sub> | <input type="checkbox"/> <sub>4</sub> | <input type="checkbox"/> <sub>5</sub> | <input type="checkbox"/> <sub>6</sub> | <input type="checkbox"/> <sub>7</sub> |
| Religiös-kulturelles Umfeld                       | <input type="checkbox"/> <sub>1</sub> | <input type="checkbox"/> <sub>2</sub> | <input type="checkbox"/> <sub>3</sub> | <input type="checkbox"/> <sub>4</sub> | <input type="checkbox"/> <sub>5</sub> | <input type="checkbox"/> <sub>6</sub> | <input type="checkbox"/> <sub>7</sub> |
| TV                                                | <input type="checkbox"/> <sub>1</sub> | <input type="checkbox"/> <sub>2</sub> | <input type="checkbox"/> <sub>3</sub> | <input type="checkbox"/> <sub>4</sub> | <input type="checkbox"/> <sub>5</sub> | <input type="checkbox"/> <sub>6</sub> | <input type="checkbox"/> <sub>7</sub> |
| Radio                                             | <input type="checkbox"/> <sub>1</sub> | <input type="checkbox"/> <sub>2</sub> | <input type="checkbox"/> <sub>3</sub> | <input type="checkbox"/> <sub>4</sub> | <input type="checkbox"/> <sub>5</sub> | <input type="checkbox"/> <sub>6</sub> | <input type="checkbox"/> <sub>7</sub> |
| Zeitungen und Zeitschriften                       | <input type="checkbox"/> <sub>1</sub> | <input type="checkbox"/> <sub>2</sub> | <input type="checkbox"/> <sub>3</sub> | <input type="checkbox"/> <sub>4</sub> | <input type="checkbox"/> <sub>5</sub> | <input type="checkbox"/> <sub>6</sub> | <input type="checkbox"/> <sub>7</sub> |
| Soziale Netzwerke                                 | <input type="checkbox"/> <sub>1</sub> | <input type="checkbox"/> <sub>2</sub> | <input type="checkbox"/> <sub>3</sub> | <input type="checkbox"/> <sub>4</sub> | <input type="checkbox"/> <sub>5</sub> | <input type="checkbox"/> <sub>6</sub> | <input type="checkbox"/> <sub>7</sub> |
| Erfahrungsberichte im Internet                    | <input type="checkbox"/> <sub>1</sub> | <input type="checkbox"/> <sub>2</sub> | <input type="checkbox"/> <sub>3</sub> | <input type="checkbox"/> <sub>4</sub> | <input type="checkbox"/> <sub>5</sub> | <input type="checkbox"/> <sub>6</sub> | <input type="checkbox"/> <sub>7</sub> |
| Offizielle Seiten im Internet                     | <input type="checkbox"/> <sub>1</sub> | <input type="checkbox"/> <sub>2</sub> | <input type="checkbox"/> <sub>3</sub> | <input type="checkbox"/> <sub>4</sub> | <input type="checkbox"/> <sub>5</sub> | <input type="checkbox"/> <sub>6</sub> | <input type="checkbox"/> <sub>7</sub> |
| Andere Seiten im Internet                         | <input type="checkbox"/> <sub>1</sub> | <input type="checkbox"/> <sub>2</sub> | <input type="checkbox"/> <sub>3</sub> | <input type="checkbox"/> <sub>4</sub> | <input type="checkbox"/> <sub>5</sub> | <input type="checkbox"/> <sub>6</sub> | <input type="checkbox"/> <sub>7</sub> |
| Andere Informationsquelle                         | <input type="checkbox"/> <sub>1</sub> | <input type="checkbox"/> <sub>2</sub> | <input type="checkbox"/> <sub>3</sub> | <input type="checkbox"/> <sub>4</sub> | <input type="checkbox"/> <sub>5</sub> | <input type="checkbox"/> <sub>6</sub> | <input type="checkbox"/> <sub>7</sub> |

## D. Personenbezogene Angaben

### D.1. Geschlecht

<sub>1</sub> männlich    <sub>2</sub> weiblich

### D.2. Geburtsjahr:

\_\_\_\_\_

### D.3. Nationalität

<sub>1</sub> SchweizerIn    <sub>2</sub> andere Nationalität: \_\_\_\_\_    <sub>3</sub> keine Angabe

### D.4. Wie lange wohnen Sie schon an Ihrem jetzigen Wohnort?

<sub>1</sub> bis zu 1 Jahr    <sub>3</sub> mehr als 2 bis 5 Jahre    <sub>5</sub> mehr als 10 bis 15 Jahre    <sub>7</sub> keine Angabe  
<sub>2</sub> mehr als 1 bis 2 Jahre    <sub>4</sub> mehr als 5 bis 10 Jahre    <sub>6</sub> mehr als 15 Jahre

### D.5. Bitte schauen Sie sich die Karte Ihres Quartiers auf der letzten Seite an. In welchem Abschnitt wohnen Sie?

Geben Sie dazu bitte die Koordinaten (Kombination von Buchstaben und Zahl auf der waagerechten bzw. senkrechten Achse) ein.  
 Abschnitt: \_\_\_\_\_

### D.6. Wohnstatus des Haushaltes, in dem Sie leben:

<sub>1</sub> Eigentumswohnung    <sub>3</sub> Mietwohnung    <sub>5</sub> Genossenschaftswohnung    <sub>7</sub> anderes: \_\_\_\_\_  
<sub>2</sub> Eigenes Haus    <sub>4</sub> Haus zur Miete    <sub>6</sub> Altersresidenz/Altersheim    <sub>8</sub> keine Angabe  
 Anzahl Quadratmeter der Wohnung/ des Hauses \_\_\_\_\_

### D.7. Wie viele Personen leben in Ihrem Haushalt / Wohngemeinschaft inklusive Ihnen?

\_\_\_\_\_ Personen

### D.8. Wie viele Kinder leben in Ihrem Haushalt?

|                          | 0                                     | 1                                     | 2                                     | 3                                     | mehr als 3                            |
|--------------------------|---------------------------------------|---------------------------------------|---------------------------------------|---------------------------------------|---------------------------------------|
| Kinder unter 7 Jahre alt | <input type="checkbox"/> <sub>1</sub> | <input type="checkbox"/> <sub>2</sub> | <input type="checkbox"/> <sub>3</sub> | <input type="checkbox"/> <sub>4</sub> | <input type="checkbox"/> <sub>5</sub> |
| Kinder über 7 Jahre alt  | <input type="checkbox"/> <sub>1</sub> | <input type="checkbox"/> <sub>2</sub> | <input type="checkbox"/> <sub>3</sub> | <input type="checkbox"/> <sub>4</sub> | <input type="checkbox"/> <sub>5</sub> |

### D.9. Falls Sie Kinder unter 7 Jahre haben, werden diese auswärtig mit anderen Kindern betreut bzw. versorgt?

<sub>1</sub> nein    <sub>2</sub> ja

### D.10. Wie setzt sich ihr Haushalt zusammen?

<sub>1</sub> Einpersonenhaushalt    <sub>3</sub> (Ehe-)Paar mit Kind    <sub>5</sub> Alleinerziehend mit Kind    <sub>7</sub> keine Angabe  
<sub>2</sub> Wohngemeinschaft    <sub>4</sub> (Ehe-)Paar ohne Kind    <sub>6</sub> Sonstiges: \_\_\_\_\_

### D.11. Wo haben Sie Ihren höchsten Bildungsabschluss erworben?

<sub>1</sub> Obligatorische Schule    <sub>4</sub> Höhere Berufsbildung    <sub>5</sub> Hochschule (ETH, Uni, FH, PH)  
<sub>2</sub> Berufslehre/-ausbildung, Berufsschule    (KV/Handelsschule, höhere    <sub>6</sub> anderer Schulabschluss \_\_\_\_\_  
<sub>3</sub> Gymnasium    Fachschule, Meister, Techniker)    <sub>7</sub> keine Angabe

### D.12. Sind Sie aktuell erwerbstätig? (Mehrfachnennungen möglich)

<sub>1</sub> Vollzeit (mind. 90%)    <sub>3</sub> SchülerIn/Lehrling/StudentIn    <sub>5</sub> RentnerIn    <sub>7</sub> Freiwilligenarbeit  
<sub>2</sub> Teilzeit/Nebenerwerb (<90%)    <sub>4</sub> Hausfrau/Hausmann    <sub>6</sub> zurzeit nicht erwerbstätig    <sub>8</sub> keine Angabe

### D.13. Falls Sie erwerbstätig sind, welches ist Ihre aktuelle berufliche Stellung?

<sub>1</sub> Angestellter mit Führungsfunktion    <sub>2</sub> Angestellter ohne Führungsfunktion    <sub>3</sub> selbstständig

### D.14. Einkommenskategorie (Monatliches Brutto-Haushaltseinkommen)

<sub>1</sub> bis CHF 2000.-    <sub>3</sub> 4001-6000 CHF    <sub>5</sub> 8001-10'000 CHF    <sub>7</sub> > 15'000 CHF  
<sub>2</sub> 2001-4000 CHF    <sub>4</sub> 6001-8000 CHF    <sub>6</sub> 10'001-15'000 CHF    <sub>8</sub> keine Angabe

### D.15. Wo arbeiten Sie? (Ort und Postleitzahl) \_\_\_\_\_

**Karte zu Frage D5**

Bitte schauen Sie sich die Karte Ihres Quartiers an und zeichnen Sie auf der Karte ungefähr ein, wo Sie wohnen. Geben Sie dazu bitte die Koordinate (Kombination von Buchstaben und Zahl auf der waagerechten bzw. senkrechten Achse) an.

**Lesebeispiel (rechts)**

Sie wohnen an der Ecke Bläsiring / Müllheimerstrasse.  
Antwort: N12

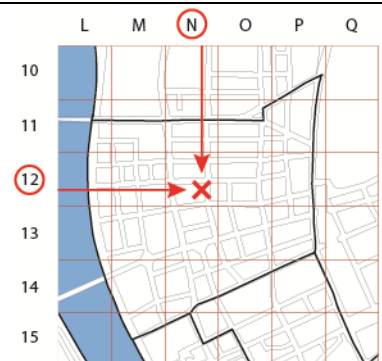

L M N O P Q

10

11

12

13

14

15

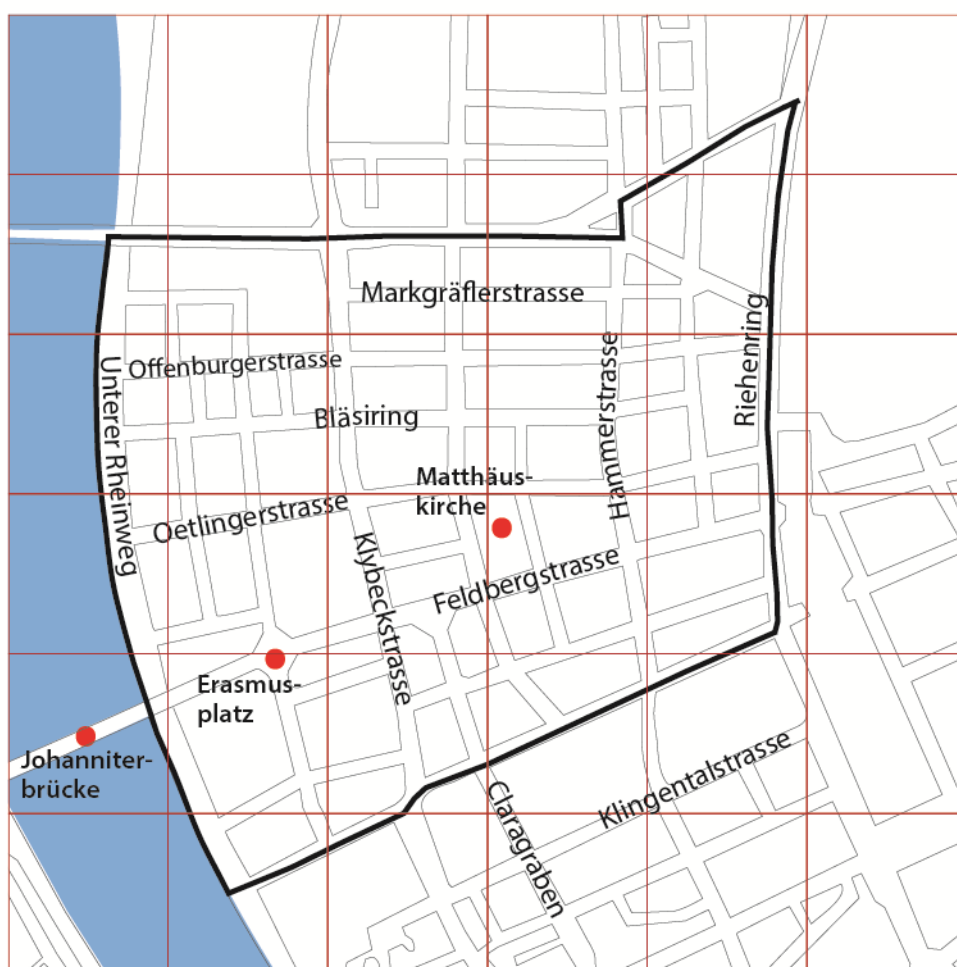

200m

**Vielen Dank für Ihre Teilnahme.**

Falls Sie am Gewinnspiel für einen Apple Computer im Wert von CHF 2500.- und zwei Pro Innerstadt-Gutscheinen im Wert von je CHF 500.- teilnehmen möchten, können Sie hier Ihren Namen und Ihre Adresse angeben:

## Questionnaire on Influenza in the City of Basel

Within the scope of the **research project on influenza in the city of Basel**, we are conducting a **survey in selected quarters of Basel**.

The participation in the survey takes approximately 15 minutes and is voluntary. **Your anonymity will be ensured**. We ask you to return this brochure with the completed questionnaire until 1<sup>st</sup> May 2016 with the postage-paid envelope.

Participants can partake in a lottery (**Apple Laptop worth CHF 2500.- and two "Pro Innerstadt"-coupons each worth CHF 500.-**). See end of questionnaire. Many thanks for your participation.

### A. Influenza and common cold

#### A.1. Did you suffer from a strong cold this winter?

- <sub>1</sub> no (if no, please continue with question A6) <sub>2</sub> yes, multiple times <sub>3</sub> yes, once

If **yes**, during which month(s): \_\_\_\_\_

If **yes**, how many days did it considerably impact your day-to-day life? \_\_\_\_\_

#### A.2. Which grievances did you have? (multiple answers possible)

- <sub>1</sub> temperature (over 38 degrees) <sub>3</sub> muscle and rheumatic pains <sub>5</sub> cough <sub>7</sub> sore throat <sub>9</sub> runny nose  
<sub>2</sub> diarrhoea <sub>4</sub> strong fatigue <sub>6</sub> headache <sub>8</sub> strong sense of illness

#### A.3. Has anyone else in your proximity been suffering from the same grievances (influenza/cold) and fallen ill?

- <sub>1</sub> no <sub>2</sub> yes <sub>3</sub> don't know

If **yes**, people (multiple answers possible):

- <sub>1</sub> in the family <sub>2</sub> at work <sub>3</sub> in the neighbourhood <sub>4</sub> in the circle of friends <sub>5</sub> in the "Verein" (club)

#### A.4. Did you contact an expert regarding the cold symptoms?

- <sub>1</sub> no <sub>2</sub> yes

If **yes**, where?

- <sub>1</sub> medical practice <sub>2</sub> hospital <sub>3</sub> pharmacy <sub>4</sub> other, namely: \_\_\_\_\_

#### A.5. Did you take medication to cure of the cold?

- <sub>1</sub> no <sub>2</sub> yes

If **yes**, did you receive Tamiflu?

- <sub>1</sub> yes <sub>2</sub> no

#### A.6. Did you get vaccinated in autumn/winter 2015/16 against Influenza?

- <sub>1</sub> no <sub>2</sub> yes

If **yes**, where: <sub>1</sub> medical practice <sub>2</sub> pharmacy <sub>3</sub> hospital <sub>4</sub> other, namely: \_\_\_\_\_

If **yes**, during which month? \_\_\_\_\_

If **no**: Why did you not get a vaccination? (please mark all relevant points)

- <sub>1</sub> I don't know why I should get vaccinated. <sub>7</sub> Friends/family have had negative experiences with it.  
<sub>2</sub> I wanted to, but then I ended up not doing it. <sub>8</sub> I'm afraid of the side effects.  
<sub>3</sub> I don't believe in the effect of the vaccination. <sub>9</sub> I find needles unpleasant.  
<sub>4</sub> A real flu strengthens my immune system and the protection lasts longer. <sub>10</sub> The vaccination was not recommended to me by experts (doctor/pharmacist).  
<sub>5</sub> It's too expensive for me. <sub>11</sub> other reason, namely: \_\_\_\_\_  
<sub>6</sub> I strengthen my immune system with other means.

If **yes**: Why did you get vaccinated? (please mark all relevant points)

- <sub>1</sub> I don't want to get influenza. <sub>4</sub> The vaccination was recommended to me by family/friends.  
<sub>2</sub> I don't want to be missing at work. <sub>5</sub> The vaccination was recommended to me at work.  
<sub>3</sub> I have friends/family who I want to protect from influenza. <sub>6</sub> The vaccination was recommended to me by experts (doctor/pharmacist).  
<sub>7</sub> other reason, namely: \_\_\_\_\_

**A.7. If you got vaccinated against influenza this year, state your experiences on a scale of 1 (very negative) to 10 (very positive):**

1  2  3  4  5  6  7  8  9  10  
 very negative very positive

If **positive** experiences, which: \_\_\_\_\_

If **negative** experiences, which: \_\_\_\_\_

**A.8. Do you get vaccinated against influenza on a regular basis?**

no  yes  
 If **yes**, since how many years: \_\_\_\_\_

**A.9. In the past, have you refused other vaccinations which were recommended to you or your children by a doctor?**

no, never  yes, but only certain vaccinations  yes, all vaccinations

**A.10. How do you evaluate your general state of health on a scale from 1 (very negative) to 10 (very positive)?**

1  2  3  4  5  6  7  8  9  10  
 very negative very positive

**A.11. Do you have a general practitioner?**

no  yes

**A.12. Do you have any chronic diseases due to which you have to take drugs on a daily basis (since at least 6 months)?**

no  yes  
 If **yes**, which drugs: \_\_\_\_\_

**A.13. Do you smoke?**

no  yes, sometimes  yes, daily (number of packets per day): \_\_\_\_\_  not specified

**A.14. Do you drink alcohol?**

no  yes, sometimes  yes, daily  not specified

**A.15. How important do you regard the following measures to prevent influenza?**

|                                      | important                  | rather important           | neutral                    | rather unimportant         | unimportant                | don't know                 | no specification           |
|--------------------------------------|----------------------------|----------------------------|----------------------------|----------------------------|----------------------------|----------------------------|----------------------------|
| <b>Vaccinating</b>                   | <input type="checkbox"/> 1 | <input type="checkbox"/> 2 | <input type="checkbox"/> 3 | <input type="checkbox"/> 4 | <input type="checkbox"/> 5 | <input type="checkbox"/> 6 | <input type="checkbox"/> 7 |
| <b>Washing hands</b>                 | <input type="checkbox"/> 1 | <input type="checkbox"/> 2 | <input type="checkbox"/> 3 | <input type="checkbox"/> 4 | <input type="checkbox"/> 5 | <input type="checkbox"/> 6 | <input type="checkbox"/> 7 |
| <b>Health check-up at the doctor</b> | <input type="checkbox"/> 1 | <input type="checkbox"/> 2 | <input type="checkbox"/> 3 | <input type="checkbox"/> 4 | <input type="checkbox"/> 5 | <input type="checkbox"/> 6 | <input type="checkbox"/> 7 |
| <b>Healthy diet</b>                  | <input type="checkbox"/> 1 | <input type="checkbox"/> 2 | <input type="checkbox"/> 3 | <input type="checkbox"/> 4 | <input type="checkbox"/> 5 | <input type="checkbox"/> 6 | <input type="checkbox"/> 7 |
| <b>Regular physical activity</b>     | <input type="checkbox"/> 1 | <input type="checkbox"/> 2 | <input type="checkbox"/> 3 | <input type="checkbox"/> 4 | <input type="checkbox"/> 5 | <input type="checkbox"/> 6 | <input type="checkbox"/> 7 |
| <b>Other</b>                         | <input type="checkbox"/> 1 | <input type="checkbox"/> 2 | <input type="checkbox"/> 3 | <input type="checkbox"/> 4 | <input type="checkbox"/> 5 | <input type="checkbox"/> 6 | <input type="checkbox"/> 7 |

other, namely: \_\_\_\_\_

**A.16. How good do you implement the following measures into your day-to-day life?**

|                                      | very good                  | good                       | average                    | bad                        | very bad                   | don't know                 | no specification           |
|--------------------------------------|----------------------------|----------------------------|----------------------------|----------------------------|----------------------------|----------------------------|----------------------------|
| <b>Vaccinating</b>                   | <input type="checkbox"/> 1 | <input type="checkbox"/> 2 | <input type="checkbox"/> 3 | <input type="checkbox"/> 4 | <input type="checkbox"/> 5 | <input type="checkbox"/> 6 | <input type="checkbox"/> 7 |
| <b>Washing hands</b>                 | <input type="checkbox"/> 1 | <input type="checkbox"/> 2 | <input type="checkbox"/> 3 | <input type="checkbox"/> 4 | <input type="checkbox"/> 5 | <input type="checkbox"/> 6 | <input type="checkbox"/> 7 |
| <b>Health check-up at the doctor</b> | <input type="checkbox"/> 1 | <input type="checkbox"/> 2 | <input type="checkbox"/> 3 | <input type="checkbox"/> 4 | <input type="checkbox"/> 5 | <input type="checkbox"/> 6 | <input type="checkbox"/> 7 |
| <b>Healthy diet</b>                  | <input type="checkbox"/> 1 | <input type="checkbox"/> 2 | <input type="checkbox"/> 3 | <input type="checkbox"/> 4 | <input type="checkbox"/> 5 | <input type="checkbox"/> 6 | <input type="checkbox"/> 7 |
| <b>Regular physical activity</b>     | <input type="checkbox"/> 1 | <input type="checkbox"/> 2 | <input type="checkbox"/> 3 | <input type="checkbox"/> 4 | <input type="checkbox"/> 5 | <input type="checkbox"/> 6 | <input type="checkbox"/> 7 |
| <b>Other</b>                         | <input type="checkbox"/> 1 | <input type="checkbox"/> 2 | <input type="checkbox"/> 3 | <input type="checkbox"/> 4 | <input type="checkbox"/> 5 | <input type="checkbox"/> 6 | <input type="checkbox"/> 7 |

## B. Aspects of city environment

### B.1. How often do you use the following means of transport?

|                                     | daily                      | several times per week     | several times per month    | rarely                     | never                      | don't know                 | no specification           |
|-------------------------------------|----------------------------|----------------------------|----------------------------|----------------------------|----------------------------|----------------------------|----------------------------|
| Car, motor cycle, motor scooter     | <input type="checkbox"/> 1 | <input type="checkbox"/> 2 | <input type="checkbox"/> 3 | <input type="checkbox"/> 4 | <input type="checkbox"/> 5 | <input type="checkbox"/> 6 | <input type="checkbox"/> 7 |
| Public transport (bus, tram, train) | <input type="checkbox"/> 1 | <input type="checkbox"/> 2 | <input type="checkbox"/> 3 | <input type="checkbox"/> 4 | <input type="checkbox"/> 5 | <input type="checkbox"/> 6 | <input type="checkbox"/> 7 |
| Bike                                | <input type="checkbox"/> 1 | <input type="checkbox"/> 2 | <input type="checkbox"/> 3 | <input type="checkbox"/> 4 | <input type="checkbox"/> 5 | <input type="checkbox"/> 6 | <input type="checkbox"/> 7 |
| On foot                             | <input type="checkbox"/> 1 | <input type="checkbox"/> 2 | <input type="checkbox"/> 3 | <input type="checkbox"/> 4 | <input type="checkbox"/> 5 | <input type="checkbox"/> 6 | <input type="checkbox"/> 7 |
| Other                               | <input type="checkbox"/> 1 | <input type="checkbox"/> 2 | <input type="checkbox"/> 3 | <input type="checkbox"/> 4 | <input type="checkbox"/> 5 | <input type="checkbox"/> 6 | <input type="checkbox"/> 7 |

other, namely: \_\_\_\_\_

### B.2. How often do you undertake in the following activities?

|                                               | daily                      | several times per week     | several times per month    | rarely                     | never                      | don't know                 | no specification           |
|-----------------------------------------------|----------------------------|----------------------------|----------------------------|----------------------------|----------------------------|----------------------------|----------------------------|
| Shopping in supermarkets (Coop, Migros, etc.) | <input type="checkbox"/> 1 | <input type="checkbox"/> 2 | <input type="checkbox"/> 3 | <input type="checkbox"/> 4 | <input type="checkbox"/> 5 | <input type="checkbox"/> 6 | <input type="checkbox"/> 7 |
| Cinema                                        | <input type="checkbox"/> 1 | <input type="checkbox"/> 2 | <input type="checkbox"/> 3 | <input type="checkbox"/> 4 | <input type="checkbox"/> 5 | <input type="checkbox"/> 6 | <input type="checkbox"/> 7 |
| Restaurant/ café/ bar                         | <input type="checkbox"/> 1 | <input type="checkbox"/> 2 | <input type="checkbox"/> 3 | <input type="checkbox"/> 4 | <input type="checkbox"/> 5 | <input type="checkbox"/> 6 | <input type="checkbox"/> 7 |
| Cultural events                               | <input type="checkbox"/> 1 | <input type="checkbox"/> 2 | <input type="checkbox"/> 3 | <input type="checkbox"/> 4 | <input type="checkbox"/> 5 | <input type="checkbox"/> 6 | <input type="checkbox"/> 7 |
| Sporting events / games                       | <input type="checkbox"/> 1 | <input type="checkbox"/> 2 | <input type="checkbox"/> 3 | <input type="checkbox"/> 4 | <input type="checkbox"/> 5 | <input type="checkbox"/> 6 | <input type="checkbox"/> 7 |

### B.3. Approximately, with how many people do you have contact on a regular work day (work environment, family, friends, clubs)?

1 0-10      2 10-50      3 50-100      4 more than 100

### B.4. If you are working, do you have contact with other people?

1 no      2 yes      3 no specification

### B.5. Do you work in the health sector with contact to patients (medical personnel or nurse)?

1 no      2 yes      3 no specification

### B.6. Do you work with children (kindergarten, play group, day care, school etc.)?

1 no      2 yes      3 no specification

### B.7. Is your workplace in an open-plan office or in a room with many people?

1 no      2 yes      3 no specification

### B.8. Do you feel exposed to damaging environmental influences in your living environment? (e.g. emissions, fine dust, electric smog, noise etc.)

1 no      2 yes      3 no specification

If yes, which: \_\_\_\_\_

### B.9. Have you visited people in hospital or an old people's home this autumn/winter 2015/16?

1 no      2 yes

If yes, how often:

1 1-4 times      2 more than 5 times      3 I regularly visit people in healthcare facilities.

### B.10. Do you regularly look after care-dependent family members at home?

1 no      2 yes

### B.11. Do you live with people who suffer from a chronic disease?

1 no      2 yes



## C. Procurement of Information on Health Questions

### C.1. From where do you procure your information on health questions? (multiple answers possible)

- <sub>1</sub> doctor  
<sub>2</sub> pharmacy  
<sub>3</sub> social circle (friends, acquaintances, family etc.)  
<sub>4</sub> religio-cultural context  
<sub>5</sub> other source of information, namely: \_\_\_\_\_  
<sub>6</sub> TV  
<sub>7</sub> radio  
<sub>8</sub> newspaper and magazines  
<sub>9</sub> social networks  
<sub>10</sub> internet, namely:  
<sub>11</sub> from experience reports of other people  
<sub>12</sub> from official websites (Federal Office of Public Health, hospital)  
<sub>13</sub> from other sites: \_\_\_\_\_  
<sub>14</sub> I don't inform myself.

### C.2. How helpful do you find the information offered?

|                                                     | very helpful                          | helpful                               | average                               | less helpful                          | not at all helpful                    | don't know                            | no specification                      |
|-----------------------------------------------------|---------------------------------------|---------------------------------------|---------------------------------------|---------------------------------------|---------------------------------------|---------------------------------------|---------------------------------------|
| Doctor                                              | <input type="checkbox"/> <sub>1</sub> | <input type="checkbox"/> <sub>2</sub> | <input type="checkbox"/> <sub>3</sub> | <input type="checkbox"/> <sub>4</sub> | <input type="checkbox"/> <sub>5</sub> | <input type="checkbox"/> <sub>6</sub> | <input type="checkbox"/> <sub>7</sub> |
| Pharmacy                                            | <input type="checkbox"/> <sub>1</sub> | <input type="checkbox"/> <sub>2</sub> | <input type="checkbox"/> <sub>3</sub> | <input type="checkbox"/> <sub>4</sub> | <input type="checkbox"/> <sub>5</sub> | <input type="checkbox"/> <sub>6</sub> | <input type="checkbox"/> <sub>7</sub> |
| Social circle (friends, acquaintances, family etc.) | <input type="checkbox"/> <sub>1</sub> | <input type="checkbox"/> <sub>2</sub> | <input type="checkbox"/> <sub>3</sub> | <input type="checkbox"/> <sub>4</sub> | <input type="checkbox"/> <sub>5</sub> | <input type="checkbox"/> <sub>6</sub> | <input type="checkbox"/> <sub>7</sub> |
| Religio-cultural context                            | <input type="checkbox"/> <sub>1</sub> | <input type="checkbox"/> <sub>2</sub> | <input type="checkbox"/> <sub>3</sub> | <input type="checkbox"/> <sub>4</sub> | <input type="checkbox"/> <sub>5</sub> | <input type="checkbox"/> <sub>6</sub> | <input type="checkbox"/> <sub>7</sub> |
| TV                                                  | <input type="checkbox"/> <sub>1</sub> | <input type="checkbox"/> <sub>2</sub> | <input type="checkbox"/> <sub>3</sub> | <input type="checkbox"/> <sub>4</sub> | <input type="checkbox"/> <sub>5</sub> | <input type="checkbox"/> <sub>6</sub> | <input type="checkbox"/> <sub>7</sub> |
| Radio                                               | <input type="checkbox"/> <sub>1</sub> | <input type="checkbox"/> <sub>2</sub> | <input type="checkbox"/> <sub>3</sub> | <input type="checkbox"/> <sub>4</sub> | <input type="checkbox"/> <sub>5</sub> | <input type="checkbox"/> <sub>6</sub> | <input type="checkbox"/> <sub>7</sub> |
| Newspaper and magazines                             | <input type="checkbox"/> <sub>1</sub> | <input type="checkbox"/> <sub>2</sub> | <input type="checkbox"/> <sub>3</sub> | <input type="checkbox"/> <sub>4</sub> | <input type="checkbox"/> <sub>5</sub> | <input type="checkbox"/> <sub>6</sub> | <input type="checkbox"/> <sub>7</sub> |
| Social networks                                     | <input type="checkbox"/> <sub>1</sub> | <input type="checkbox"/> <sub>2</sub> | <input type="checkbox"/> <sub>3</sub> | <input type="checkbox"/> <sub>4</sub> | <input type="checkbox"/> <sub>5</sub> | <input type="checkbox"/> <sub>6</sub> | <input type="checkbox"/> <sub>7</sub> |
| Experience reports of other people on the internet  | <input type="checkbox"/> <sub>1</sub> | <input type="checkbox"/> <sub>2</sub> | <input type="checkbox"/> <sub>3</sub> | <input type="checkbox"/> <sub>4</sub> | <input type="checkbox"/> <sub>5</sub> | <input type="checkbox"/> <sub>6</sub> | <input type="checkbox"/> <sub>7</sub> |
| Official websites on the internet                   | <input type="checkbox"/> <sub>1</sub> | <input type="checkbox"/> <sub>2</sub> | <input type="checkbox"/> <sub>3</sub> | <input type="checkbox"/> <sub>4</sub> | <input type="checkbox"/> <sub>5</sub> | <input type="checkbox"/> <sub>6</sub> | <input type="checkbox"/> <sub>7</sub> |
| Other websites on the internet                      | <input type="checkbox"/> <sub>1</sub> | <input type="checkbox"/> <sub>2</sub> | <input type="checkbox"/> <sub>3</sub> | <input type="checkbox"/> <sub>4</sub> | <input type="checkbox"/> <sub>5</sub> | <input type="checkbox"/> <sub>6</sub> | <input type="checkbox"/> <sub>7</sub> |
| Other sources of information                        | <input type="checkbox"/> <sub>1</sub> | <input type="checkbox"/> <sub>2</sub> | <input type="checkbox"/> <sub>3</sub> | <input type="checkbox"/> <sub>4</sub> | <input type="checkbox"/> <sub>5</sub> | <input type="checkbox"/> <sub>6</sub> | <input type="checkbox"/> <sub>7</sub> |

## D. Personal Data

### D.1. Gender

- <sub>1</sub> male <sub>2</sub> female

### D.2. Year of birth:

\_\_\_\_\_

### D.3. Nationality

- <sub>1</sub> Swiss <sub>2</sub> other nationality: \_\_\_\_\_ <sub>3</sub> no specification

### D.4. How long have you been living at your current location?

- <sub>1</sub> up to 1 year <sub>2</sub> more than 1 to 2 years <sub>3</sub> more than 2 to 5 years <sub>4</sub> more than 5 to 10 years <sub>5</sub> more than 10 to 15 years <sub>6</sub> more than 15 years <sub>7</sub> no specification

### D.5. Please look at the map of your quarter on the last page. In which segment do you live? Please state the coordinates (a combination of a letter and a number on the horizontal respectively vertical axis).

Segment: \_\_\_\_\_

### D.6. Residential status of the household you are living in:

- <sub>1</sub> owner-occupied flat <sub>2</sub> owner-occupied house <sub>3</sub> rental apartment <sub>4</sub> rental house <sub>5</sub> co-operative flat <sub>6</sub> old people's home <sub>7</sub> other: \_\_\_\_\_ <sub>8</sub> no specification

Number of square metres of the apartment/house: \_\_\_\_\_

### D.7. How many people live in your household / flat share including yourself?

\_\_\_\_\_ people

### D.8. How many children live in your household?

|                            | 0                                     | 1                                     | 2                                     | 3                                     | More than 3                           |
|----------------------------|---------------------------------------|---------------------------------------|---------------------------------------|---------------------------------------|---------------------------------------|
| Children under 7 years old | <input type="checkbox"/> <sub>1</sub> | <input type="checkbox"/> <sub>2</sub> | <input type="checkbox"/> <sub>3</sub> | <input type="checkbox"/> <sub>4</sub> | <input type="checkbox"/> <sub>5</sub> |
| Children over 7 years old  | <input type="checkbox"/> <sub>1</sub> | <input type="checkbox"/> <sub>2</sub> | <input type="checkbox"/> <sub>3</sub> | <input type="checkbox"/> <sub>4</sub> | <input type="checkbox"/> <sub>5</sub> |

### D.9. If you have children under 7 years old, are they being looked after externally together with other children?

- <sub>1</sub> no <sub>2</sub> yes

### D.10. What is the structure of your household?

- <sub>1</sub> one-person household <sub>2</sub> flat share <sub>3</sub> (married) couple with child <sub>4</sub> (married) couple without child <sub>5</sub> single parent with child <sub>6</sub> other: \_\_\_\_\_ <sub>7</sub> no specification

### D.11. Where have you attained your educational qualification?

- <sub>1</sub> compulsory school <sub>2</sub> vocational education / -training, trade school <sub>3</sub> gymnasium <sub>4</sub> higher vocational education (commercial college, higher professional school, foreman, technician) <sub>5</sub> institution of higher education (ETH, university, college, teacher training college) <sub>6</sub> other school qualification \_\_\_\_\_ <sub>7</sub> no specification

### D.12. Are you currently employed? (multiple answers possible)

- <sub>1</sub> full-time (min. 90%) <sub>2</sub> part-time/side job (<90%) <sub>3</sub> pupil/apprentice/student <sub>4</sub> housewife/househusband <sub>5</sub> pensioner <sub>6</sub> currently not employed <sub>7</sub> voluntary work <sub>8</sub> no specification

### D.13. If you are employed, what position do you hold?

- <sub>1</sub> employee with management function <sub>2</sub> employee without management function <sub>3</sub> self-employed

### D.14. Category of income (monthly gross household income)

- <sub>1</sub> up to CHF 2000 <sub>2</sub> 2001-4000 CHF <sub>3</sub> 4001-6000 CHF <sub>4</sub> 6001-8000 CHF <sub>5</sub> 8001-10'000 CHF <sub>6</sub> 10'001-15'000 CHF <sub>7</sub> > 15'000 CHF <sub>8</sub> no specification

### D.15. Where do you work? (place and postcode): \_\_\_\_\_

**Map for question D5**

Please look at the map of your quarter and mark the approximate location of your residence. Please state the coordinates (a combination of a letter and a number on the horizontal respectively vertical axis).

**Example (right)**

You live at the corner of Bläsiring / Müllheimerstrasse.

Answer: N12

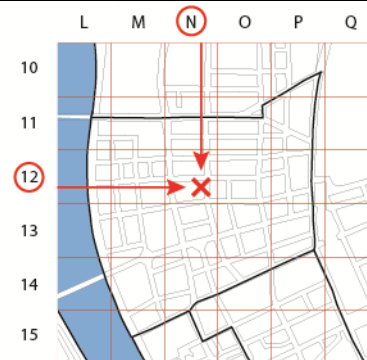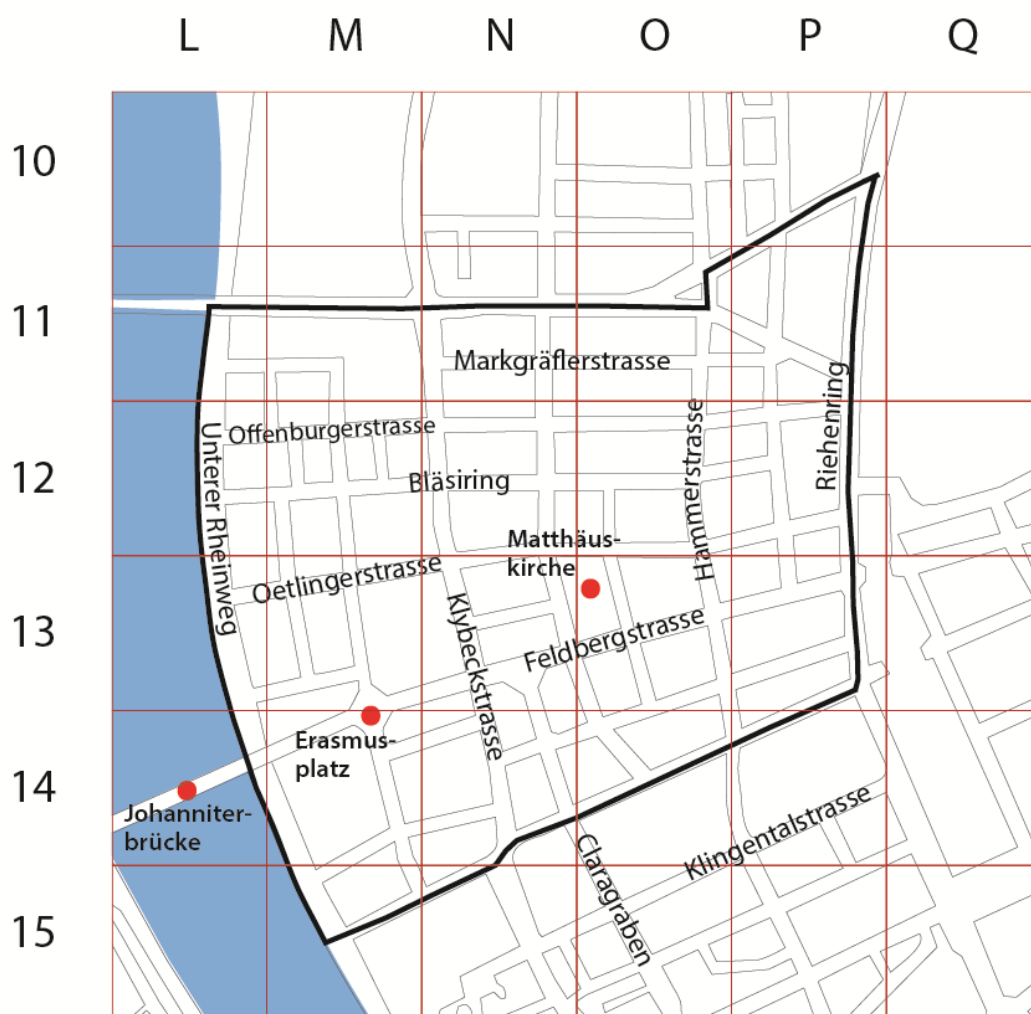

**Thank you for your participation.**

If you would like to participate in the lottery for an Apple computer worth CHF 2500.- and two "Pro Innerstadt"-coupons each worth CHF 500.-, you can leave your name and address here:

# BMJ Open

## Identification of influenza urban transmission patterns by geographical, epidemiological and whole genome sequencing data: Protocol for an observational study.

|                                 |                                                                                                                                                                                                                                                                                                                                                                                                                                                                                                                                                                                                                                                                                                                                                                                                                                                                                                                                                                                                                                                                                                                                                                                                                                                                                                                                                                                                                                                                                                                                                                                                                                                                                                                                                                 |
|---------------------------------|-----------------------------------------------------------------------------------------------------------------------------------------------------------------------------------------------------------------------------------------------------------------------------------------------------------------------------------------------------------------------------------------------------------------------------------------------------------------------------------------------------------------------------------------------------------------------------------------------------------------------------------------------------------------------------------------------------------------------------------------------------------------------------------------------------------------------------------------------------------------------------------------------------------------------------------------------------------------------------------------------------------------------------------------------------------------------------------------------------------------------------------------------------------------------------------------------------------------------------------------------------------------------------------------------------------------------------------------------------------------------------------------------------------------------------------------------------------------------------------------------------------------------------------------------------------------------------------------------------------------------------------------------------------------------------------------------------------------------------------------------------------------|
| Journal:                        | <i>BMJ Open</i>                                                                                                                                                                                                                                                                                                                                                                                                                                                                                                                                                                                                                                                                                                                                                                                                                                                                                                                                                                                                                                                                                                                                                                                                                                                                                                                                                                                                                                                                                                                                                                                                                                                                                                                                                 |
| Manuscript ID                   | bmjopen-2019-030913.R1                                                                                                                                                                                                                                                                                                                                                                                                                                                                                                                                                                                                                                                                                                                                                                                                                                                                                                                                                                                                                                                                                                                                                                                                                                                                                                                                                                                                                                                                                                                                                                                                                                                                                                                                          |
| Article Type:                   | Protocol                                                                                                                                                                                                                                                                                                                                                                                                                                                                                                                                                                                                                                                                                                                                                                                                                                                                                                                                                                                                                                                                                                                                                                                                                                                                                                                                                                                                                                                                                                                                                                                                                                                                                                                                                        |
| Date Submitted by the Author:   | 16-Jul-2019                                                                                                                                                                                                                                                                                                                                                                                                                                                                                                                                                                                                                                                                                                                                                                                                                                                                                                                                                                                                                                                                                                                                                                                                                                                                                                                                                                                                                                                                                                                                                                                                                                                                                                                                                     |
| Complete List of Authors:       | Egli, Adrian; University Hospital Basel, Clinical Microbiology; University of Basel, Biomedicine<br>Saalfrank, Claudia; University of Basel<br>Goldman, Nina; University of Basel, Environmental Sciences<br>Brunner, Myrta; University of Basel, Environmental Sciences<br>Hollenstein, Yvonne; University of Basel, Biomedicine<br>Vogel, Thomas; University of Basel, th.vogel@unibas.ch<br>Augustin, Noémie; University of Basel, Environmental Sciences<br>Wüthrich, Daniel; University Hospital Basel, Clinical Microbiology<br>Seth-Smith, Helena; University Hospital Basel, Clinical Microbiology<br>Roth, Elisa; University of Basel, Biomedicine<br>Syedbasha, Mohammedyaseen; University of Basel<br>Mueller, Nicola; ETH Zurich D-BSSE, Biosystems Science and Engineering<br>Vogt, Dominik; University of Basel, Biomedicine<br>Bauer, Jan; University of Basel, Environmental Sciences<br>Amar-Sliwa, Nadezhda ; University of Basel, Environmental Sciences<br>Meinel, Dominik; University Hospital Basel, Clinical Microbiology<br>Dubuis, Olivier ; Viollier AG, Microbiology<br>Naegele, Michael; Viollier AG, Microbiology<br>Tschudin-Sutter, Sarah; University Hospital Basel<br>Buser, Andreas; Blood donation center of both Basel<br>Nickel , Christian; University Hospital Basel, Emergency Medicine<br>Zeller, Andreas; University of Basel, Centre for Primary Health Care<br>Ritz, Nicole; UKBB Universitäts-Kinderspital, Pediatric Infectious Diseases and Vaccinology<br>Battegay, Manuel; University Hospital Basel, Division of Infectious Diseases and Hospital Epidemiology<br>Stadler, Tanja; ETH Zurich D-BSSE, Biosystems Science and Engineering<br>Schneider-Sliwa, Rita; University of Basel, Environmental Sciences |
| <b>Primary Subject Heading</b>: | Epidemiology                                                                                                                                                                                                                                                                                                                                                                                                                                                                                                                                                                                                                                                                                                                                                                                                                                                                                                                                                                                                                                                                                                                                                                                                                                                                                                                                                                                                                                                                                                                                                                                                                                                                                                                                                    |
| Secondary Subject Heading:      | Infectious diseases, Paediatrics, Respiratory medicine                                                                                                                                                                                                                                                                                                                                                                                                                                                                                                                                                                                                                                                                                                                                                                                                                                                                                                                                                                                                                                                                                                                                                                                                                                                                                                                                                                                                                                                                                                                                                                                                                                                                                                          |
| Keywords:                       | transmission, whole genome sequencing, geography, questionnaire, influenza, study design                                                                                                                                                                                                                                                                                                                                                                                                                                                                                                                                                                                                                                                                                                                                                                                                                                                                                                                                                                                                                                                                                                                                                                                                                                                                                                                                                                                                                                                                                                                                                                                                                                                                        |
|                                 |                                                                                                                                                                                                                                                                                                                                                                                                                                                                                                                                                                                                                                                                                                                                                                                                                                                                                                                                                                                                                                                                                                                                                                                                                                                                                                                                                                                                                                                                                                                                                                                                                                                                                                                                                                 |

1  
2  
3  
4  
5  
6  
7  
8  
9  
10  
11  
12  
13  
14  
15  
16  
17  
18  
19  
20  
21  
22  
23  
24  
25  
26  
27  
28  
29  
30  
31  
32  
33  
34  
35  
36  
37  
38  
39  
40  
41  
42  
43  
44  
45  
46  
47  
48  
49  
50  
51  
52  
53  
54  
55  
56  
57  
58  
59  
60

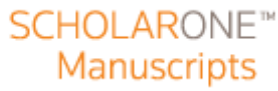

1  
2  
3 1 **Identification of influenza urban transmission patterns by geographical,**  
4 2 **epidemiological and whole genome sequencing data: Protocol for an observational**  
5 3 **study.**  
6 4

7 4  
8 5 Adrian Egli<sup>1,2,3\*</sup>, Claudia Saalfrank<sup>4</sup>, Nina Goldman<sup>4</sup>, Myrta Brunner<sup>4</sup>, Yvonne Hollenstein<sup>2</sup>,  
9 6 Thomas Vogel<sup>4</sup>, Noémie Augustin<sup>4</sup>, Daniel Wüthrich<sup>1,2,5</sup>, Helena M.B. Seth-Smith<sup>1,2,5</sup>, Elisa  
10 7 Roth<sup>1,2</sup>, Mohammedyaseen Syedbasha<sup>2</sup>, Nicola F. Mueller<sup>5,6</sup>, Dominik Vogt<sup>2</sup>, Jan Bauer<sup>4</sup>,  
11 8 Nadezhda Amar-Sliwa<sup>4</sup>, Dominik M. Meinel<sup>1,2</sup>, Olivier Dubuis<sup>7</sup>, Michael Naegele<sup>7</sup>, Sarah  
12 9 Tschudin-Sutter<sup>3,8</sup>, Andreas Buser<sup>9</sup>, Christian H. Nickel<sup>10</sup>, Andreas Zeller<sup>11</sup>, Nicole Ritz<sup>12</sup>,  
13 10 Manuel Battegay<sup>8</sup>, Tanja Stadler<sup>5,6,§</sup>, Rita Schneider-Sliwa<sup>4,§</sup>  
14 10  
15 11

16 12 <sup>1</sup> Division of Clinical Microbiology, University Hospital Basel, Basel, Switzerland

17 13 <sup>2</sup> Applied Microbiology Research, Department of Biomedicine, University of Basel, Basel,  
18 14 Switzerland

19 15 <sup>3</sup> Department of Clinical Research, University of Basel, Basel, Switzerland

20 16 <sup>4</sup> Human Geography, Department for Environmental Sciences, University of Basel, Basel,  
21 17 Switzerland

22 18 <sup>5</sup> Swiss Institute for Bioinformatics, Basel, Switzerland

23 19 <sup>6</sup> Department of Biosystems Science and Engineering, ETH Zürich, Basel, Switzerland

24 20 <sup>7</sup> Clinical Microbiology, Viollier AG, Allschwil, Switzerland

25 21 <sup>8</sup> Division of Infectious Diseases and Hospital Epidemiology, University Hospital Basel,  
26 22 University of Basel, Basel, Switzerland

27 23 <sup>9</sup> Blood donation center of both Basel, Swiss Red Cross, Basel, Switzerland

28 24 <sup>10</sup> Department of Emergency Medicine, University Hospital Basel, Basel, Switzerland

29 25 <sup>11</sup> Centre for Primary Health Care, University of Basel, Basel, Switzerland

30 26 <sup>12</sup> Pediatric Infectious Diseases and Vaccinology, University Children's Hospital Basel and  
31 27 University of Basel, Basel Switzerland

32 28  
33 29 Short Title: Influenza transmission study: study design  
34 30

35 31 Keywords: Study design, transmission, whole genome sequencing, geography, GIS maps,  
36 32 questionnaire, Influenza A, virus, typing, method  
37 33

38 34 § equally contributed to the manuscript  
39 35

40 36 \*corresponding author:

41 37 Adrian Egli, MD PhD

42 38 Division of Clinical Microbiology

43 39 University Hospital Basel

44 40 Petersgraben 4

45 41 4031 Basel, Switzerland

46 42 E-mail: [adrian.egli@usb.ch](mailto:adrian.egli@usb.ch)

47 43 Phone: +41 61 556 57 49  
48  
49  
50  
51  
52  
53  
54  
55  
56  
57  
58  
59  
60

**Abstract (words 281):**

*Introduction:* Urban transmission patterns of influenza viruses are complex and poorly understood, and multiple factors may play a critical role in modifying transmission. Whole genome sequencing (WGS) allows the description of patient-to-patient transmissions at highest resolution. The aim of this study is to explore urban transmission patterns of influenza viruses in high detail by combining geographical, epidemiological, and immunological data with WGS data.

*Methods and Analysis:* The study is performed at the University Hospital Basel, University Children's Hospital Basel, and a network of pediatricians and family doctors in the Canton of Basel-City, Switzerland. The retrospective study part includes an analysis of PCR-confirmed influenza cases from 2013 to 2018. The prospective study parts include (i) a household survey regarding influenza-like illness (ILI) and vaccination against influenza during the 2015/2016 season; (ii) an analysis of influenza viruses collected during the 2016/2017 season using WGS - viral genomic sequences are compared to determine genetic relatedness and transmissions; and (iii) measurement of influenza-specific antibody titers against all vaccinated and circulated strains during the 2016/2017 season from healthy individuals, allowing to monitor herd immunity across urban quarters. Survey data and PCR-confirmed cases are linked to data from the Statistics Office of the Canton Basel-City and visualized using geo-information-system (GIS) mapping. WGS data will be analyzed in the context of patient epidemiological data using phylodynamic analyses, and the obtained herd immunity for each quarter.

Profound knowledge on the key geographical, epidemiological and immunological factors influencing urban influenza transmission will help to develop effective counter measurements.

*Ethics and dissemination:* The study is registered (clinicaltrials.gov; NCT03010007 on 22<sup>nd</sup> December 2016) and approved by the regional ethics committee as an observational study (EKNZ project ID 2015–363 and 2016-01735). It is planned to present the results at conferences and publish the data in scientific journals.

**Strength and limitations:**

A first strength is, that to date this is the largest study on influenza transmission in a city. A second strength is, that it provides unprecedented high resolution and granularity of demographic, epidemiological and geographical data and that it links multiple dataset together. A third strength is that the analysis over several consecutive years.

A limitation of the study is, that not all influenza infections can be captured in a city and also by this study design. A second limitation is that the survey part may introduce bias, based on the selection of the population who replied.



## 82 Introduction (words: 4234)

83 Seasonal influenza is associated with substantial morbidity, mortality, and healthcare costs.  
84 Transmission of influenza has been explored with various methods and techniques (1-3).  
85 Whole genome sequencing (WGS) has the highest possible technical resolution for molecular  
86 typing of viruses and is increasingly used to understand and monitor transmission events of  
87 influenza viruses. Recently, WGS technology helped to explore important aspects of  
88 transmissions within households (4), hospitals (5-7), university campuses (8), and between  
89 countries (9). However, most studies lack crucial details on the epidemiological and  
90 demographic context of the infected patients and therefore cannot provide sufficient in-depth  
91 knowledge on risk factors for and pathways of transmission. Understanding pathogen  
92 transmission from patient-to-patient, especially within the urban context, may inform public  
93 health interventions targeting specific transmission chains.

94  
95 Urban transmission clusters have not yet been explored in detail. The impact of host and  
96 environment factors within a city may greatly vary depending of the scale e.g. direct person-  
97 to-person, within an urban quarter, within and between countries, and around the globe. Within  
98 cities, multiple factors may entertain transmission, such as population densities, available  
99 living space per person, usage of public transport, social economic structures and behaviors,  
100 age, vaccine rates, and herd immunity. Urban quarters often vary greatly in some of those  
101 factors. Therefore, the differences accumulating within urban quarters may allow us to study  
102 the impact of geographical, social and demographic factors in the context of urban  
103 transmission of influenza. So far, only a few epidemiological studies have conceptualized  
104 these “geographic area” variables for influenza focused transmission and vaccine research  
105 (10-14).

106  
107 Combining detailed population related data with high-resolution WGS-based typing of  
108 influenza viruses may allow us to profoundly understand factors entertaining urban influenza  
109 transmission within the microenvironments of a city. Based on the generated knowledge,  
110 targeted public health policies can be informed. Furthermore, these findings may also be  
111 translated to other transmissible diseases. In this article, we describe in detail the study design  
112 of a three-year research project funded by the Swiss National Science Foundation  
113 ([www.snsf.ch](http://www.snsf.ch)) to explore urban influenza transmission.

## 116 Aims and objectives

117 The main objective of this project is to explore the transmission patterns of influenza within a  
118 city. Geographical, epidemiological, microbiological, and immunological factors are analyzed  
119 to explain urban transmission patterns.

120  
121 The *specific aims of the retrospective study* parts are:

- 122 ● Analyzing PCR-confirmed influenza cases (seasons 2013/2014 to 2017/2018)
  - 123 (i) Accessing PCR-confirmed influenza cases from various institutions across Basel.
  - 124 (ii) Visualizing the frequency and spread of incidences with the help of point pattern and  
125 other analytical techniques including georeferencing individual cases.
  - 126 (iii) Analysis of influenza cases by mapping incidences with demographic data from the  
127 Statistical Office of the Canton Basel-City.

128  
129 The *specific aims of the prospective study* parts are:



- 1  
2  
3 130 ● Household survey (season 2015/2016)  
4 131 (i) Conducting household surveys within 10 urban quarters.  
5 132 (ii) Determination of the influenza like illness (ILI) rate on individual and urban quarters  
6 133 levels, and exploring factors associated with ILI.  
7 134 (iii) Determination of influenza vaccine rate on individual and urban quarters levels, and  
8 135 exploring factors associated with influenza vaccine rates.  
9 136 (iv) Linkage and analysis of data from the household survey with demographic data from  
10 137 the Statistics Office of the Canton Basel-Basel e.g. population density.  
11 138  
12 139 ● Transmission study  
13 140 (i) Building a prospective biobank of PCR-confirmed influenza patients including  
14 141 nasopharyngeal swabs, serum and blood samples.  
15 142 (ii) Sequencing of influenza viruses using WGS and performing phylogenetic analysis,  
16 143 revealing the relatedness of viral strains from individuals within Basel, as well as the  
17 144 relatedness of Basel sequences to foreign sequences obtained from public available  
18 145 databases.  
19 146 (iii) Analysis of transmission patterns in association with clinical, demographic,  
20 147 immunological, and geographical data.  
21 148  
22 149 ● Influenza-specific antibody titers  
23 150 (i) Determination of influenza-specific humoral immunity of healthy individuals and  
24 151 translating the titers to herd immunity levels within urban quarters during the influenza  
25 152 season.  
26 153

### 154 Patient and public involvement

155 The study proposal was evaluated by the local ethical committee, reflecting a detailed  
156 evaluation of patient rights in conducting research. In the survey the public was informed via  
157 the questionnaire and in the influenza transmission study patients will be informed according  
158 to the laws and regulation of the Swiss Human Research Act including the previously  
159 mentioned evaluation by the local ethical committee. As this is a study protocol for an  
160 observational epidemiological study no intervention was planned. All study participants in the  
161 prospective study parts received information material about the study purpose, aims and what  
162 will happen with the data collected.  
163

### 164 Methods/ Design

165 *Setting.* In November 2015 the City of Basel had a total of 176'950 inhabitants distributed over  
166 19 urban quarters. An estimated five percent of the population are thought to be infected with  
167 influenza viruses annually. The University Hospital Basel and the University Children Hospital  
168 Basel are tertiary academic institutions with more than 500'000 adult and 100'000 pediatric  
169 outpatient consultations annually. Both hospitals provide emergency department services  
170 during influenza seasons. The University Hospital Basel recruited adult patients and the  
171 University Children Hospital recruited pediatric patients for this study. In addition, a network  
172 of 24 pediatricians and family doctors also recruited patients (see below). Some of the data  
173 and samples were received from Viollier, a private laboratory providing its services to a large  
174 part of private practices within the City of Basel.  
175  
176  
177

1  
2  
3 178 *Study design.* The observational descriptive study consists of retrospective and prospective  
4 179 parts that are performed at the previously mentioned institutions. **Figure 1** provides an  
5 180 overview on the different study elements.  
6 181

7 181  
8 182 A. Retrospective Studies:

9 183 *A1. PCR-confirmed influenza cases.*

10 184 For this study part, we collect all PCR-confirmed cases from the laboratory and clinical  
11 185 information systems of the University Hospital Basel, the University Children Hospital, and the  
12 186 Viollier diagnostic laboratory for the influenza seasons 2013/2014 to 2017/2018 with daily  
13 187 resolution. Data from influenza diagnostic services of nasopharyngeal swabs and additional  
14 188 respiratory material is available since 2013. For all PCR-confirmed Influenza A and B cases,  
15 189 further information is accessed e.g. age at infection, gender, and residential address. From  
16 190 the Statistics Office of the Canton Basel-City, additional data on the specific housing block is  
17 191 available e.g. population density, net income, and living space. The cases are mapped and  
18 192 areas with high occurrence identified using kernel densities (see below).  
19 193

20 192  
21 193  
22 194 B. Prospective Studies

23 194  
24 195 *B1. Household survey.*

25 196 We designed a household survey for the influenza season 2015/2016 in order to collect data  
26 197 on influenza-like illness and influenza vaccination. **Figure 2** shows in which urban quarters  
27 198 we distributed 30,000 questionnaires. We chose to study the level of official urban quarters,  
28 199 rather to postcode, as all the data from the Statistics Office of the Canton Basel-City was  
29 200 available at that level. In addition, the areas covered by postcodes and boundaries of official  
30 201 urban quarters do not correspond, making the use of data based on the postcode level  
31 202 unsuitable for the analysis of urban quarters. The distribution of questionnaires started in April  
32 203 2016 when the incidence rate of the influenza cases dropped below official reported endemic  
33 204 threshold levels.  
34 205

35 205  
36 206 *Participants and sample size.* We used the probability-proportional-to-size (PPS) sampling as  
37 207 a basis to plan the survey, as each quarter's base population varies as well as the systematic  
38 208 equal probability of selection (EPS) sampling method within each quarter, so that each  
39 209 household had an equal probability of being selected. Both sampling methods account for the  
40 210 heterogeneity of urban quarters. In order to gain insights into community variation in attitudes,  
41 211 beliefs and behaviors on influenza vaccination from a representative sample, the survey was  
42 212 distributed in ten selected urban quarters (**Figure 2**) of Basel, which displayed a great variety  
43 213 in terms of socio-demographic and -economic and building structures. Everyone not living in  
44 214 one of the ten selected urban quarters was excluded from the survey.  
45 215

46 215  
47 216 We calculated the *number of responses needed* (n) to make the data representative with the  
48 217 following equation:  
49 218

$$n \geq \frac{N}{1 + \frac{(N-1)e^2}{K^2V(1-V)}}$$

50 218  
51 219  
52 220  
53 221 N = Households by urban quarter; e = sampling error 5%; K = 1,96 confidence level  
54 222 (90%=1.64; 95%=1.96; 99%=2.58); V = distribution of responses (50%)  
55  
56  
57  
58  
59  
60

223

224

225

226

227

228

229

230

231

232

233

234

235

236

237

238

239

240

241

242

243

244

245

246

247

248

249

250

251

252

253

254

255

256

257

258

259

260

261

262

263

264

265

266

267

268

269

270

We calculate the number of necessary questionnaires to be distributed per quarter by using the amount of responses needed per quarter, assuming a response rate of 12% (**Table 1**). The questionnaire is translated into the six most commonly spoken languages (German, English, Italian, Serbo-Croatian, Albanian, and Turkish). Distribution is according to the three most commonly spoken language per quarter based on data from the Statistics Office of the Canton Basel-City (**Table 2**). Every household received a German questionnaire. The full-length English version of the questionnaire can be found in the online supplementary material (**supplementary material 1**), and a German version in the supplementary material (**supplementary material 2**).

*Variables.* A total of 54 questions are included in the survey covering the following topics: (a) Influenza-like illnesses and vaccination, (b) aspects of urban environment, (c) information collection about health, and (d) person related data.

### *B2. Influenza transmission using whole genome sequencing.*

In this project part, patients with ILI were recruited, and confirmed Influenza viruses are sequenced using WGS (15). This allows us to determine the phylogeny and transmission interference within urban quarters of the city in the context of particular demographic, geographical and microbiological factors.

*Participants and recruitment.* All patients with suspected ILI seen at one of the study sites are qualified to participate. The inclusion criteria for ILI are: recent anamnestic fever, coughing, myalgia, arthralgia, and sudden onset of disease. Patients (or parents in the case of children) are informed about the study and asked for a written informed consent. Then respiratory samples, mainly nasopharyngeal swabs, are collected. Patients are recruited at 15 study sites distributed throughout the city. The samples are delivered on the same day to the Clinical Microbiology laboratory for immediate sample processing and PCR testing.

*Strain collection and influenza diagnostics.* For the influenza season 2016/2017, all positive and negative samples are collected and stored at  $-80^{\circ}\text{C}$ . In addition, additional influenza positive samples from the study season 2016/2017 are provided from a private diagnostic laboratory (Viollier AG, Allschwil, Switzerland). Both laboratories used the FluXpress (Cepheid), which allows the (semi-)quantitative determination of influenza A, influenza B, and respiratory syncytial virus (RSV). Serial isolates from the same patients are also collected and stored until WGS workup.

*Additional samples.* In addition to the nasopharyngeal swab for influenza, we also collect the following materials: whole blood (EDTA) samples for analysis of host genetics and serum samples for measurement of HIA titers as previously described (Kaufmann L et al. JOVE 2017) against vaccine and circulating influenza strains.

*Additional data.* Patient data from influenza cases were merged with metadata from the Statistics Office of the Canton Basel-City. In addition, the patients were provided with two questionnaires. The first one covers the most recent events during ILI of the last few days, the second one focuses on the behavior while being ill. Patient are instructed to send the second questionnaire two weeks after the ILI episode.

1  
2  
3 271 *Whole genome sequencing of viruses.* We use a molecular epidemiological approach to  
4 272 characterize the collected influenza viruses from individual patients with the highest possible  
5 273 resolution. The sequencing procedure has been described in detail (15). Briefly, all samples  
6 274 from ILI patients are analyzed by influenza specific PCRs. PCR-confirmed samples are further  
7 275 processed: first, RNA is extracted from nasopharyngeal swab/fluid; then reverse transcription  
8 276 and PCR is used to amplify all eight RNA viral segments; then PCR products are sequenced  
9 277 with high coverage using a MiSeq system (Illumina).  
10  
11 278

### 12 279 *B3. Determination of herd immunity in health individuals.*

13 280 *Participants and recruitment.* Blood donors from the local Swiss Red Cross blood donation  
14 281 center living in Basel are recruited for this study part. All blood donors included are above the  
15 282 age of 18 years and lived in Basel. At two time-points, before and after the 2016/2017 influenza  
16 283 season, serum samples are provided to determine antibody titers. The time between serum  
17 284 collections was three to nine months. In addition, the vaccine status is documented with a  
18 285 questionnaire.  
19 286

20 287 *Measurement of antibody titers.* Antibody titers are determined as previously described (16).  
21 288 Briefly, antibody titers are determined using the hemagglutination inhibition (HI) assay against  
22 289 the following viruses: Influenza A/Hong Kong/4801/2014 (H3N2); Influenza  
23 290 A/California/7/2009 (H1N1); Influenza B/Brisbane/60/2008; and Influenza  
24 291 B/Phuket/3073/2013. HI titers of  $\geq 1:40$  are considered as seroprotection against this particular  
25 292 virus strain. The predominant virus in the 2016/2017 influenza season is Influenza  
26 293 A/HongKong/H3N2. Within an urban quarter, the seroprotective titer is expressed as  
27 294 percentage of the measured population.  
28  
29  
30  
31  
32  
33  
34

## 35 297 **Quantitative data analyses and modelling**

### 36 298 *A Retrospective study*

37 299 *General aspects of GIS mapping.* By including the spatial environment of the urban districts,  
38 300 the study aims to understand whether spatial spreading patterns of influenza coincide  
39 301 significantly with aspects of the urban environment and/or the socioeconomic structure.  
40 302 Influenza incidences and relevant aspects of the urban environment are visualized in ArcGIS  
41 303 (Esri, Switzerland) and combined with oblique aerial photography of urban quarters that are  
42 304 structured differently in terms of the built environment. GIS-assisted analyses of the spatial  
43 305 distribution and spreading of influenza incidences blended with block level statistical data from  
44 306 the Statistics Office of the Canton Basel-City are designed to determine close contact  
45 307 environments e.g. infrastructure in the quarter, population density, living density, housing  
46 308 density. In addition, we can determine the urban social structure such as age distribution,  
47 309 social life situations, education status, migration background, housing and living  
48 310 arrangements, that may be related to higher occurrences of influenza cases. The possible  
49 311 association between influenza cases and relevant environmental factors are then analyzed  
50 312 with spatial statistics. Thus, it can be determined, for example, if the number of influenza cases  
51 313 is higher in densely built, densely populated areas, and in areas with certain age structures.  
52  
53  
54  
55  
56  
57  
58  
59  
60

314  
315 *Data processing, GIS mapping for the Canton Basel-City.* All maps are generated using  
316 ArcGIS (Version 10.3). The base-map showing individual statistical blocks/urban  
317 quarters/cantonal boundaries was obtained from the "Office for Geoinformatics, City of Basel"  
318 (download via Geoshop). It should be noted that, while for the City of Basel, the road network



1  
2  
3 319 defines the boundaries of the statistical blocks in most cases, this is not the case outside the  
4 320 city boundaries. Due to the small size of the individual statistical blocks, their street patterns  
5 321 are not displayed, allowing the presentation of the statistical data as truthfully as possible.  
6 322 ArcGIS allows the georeferencing of individual living addresses by using the tool “Geocode  
7 323 Addresses”. The resulting shapefile indicates each influenza case with an individual point  
8 324 feature which can be classified according to added attributes like influenza type, month or  
9 325 week of examination. However, for data protection and ethical reasons, individual cases are  
10 326 not displayed with the address of residence, but only at the at the statistical block level.  
11  
12  
13 327

14 328 *Kernel densities.* Kernel density estimation is a fundamental data smoothing method where  
15 329 inferences about the population are made, based on a finite data sample. The kernel density  
16 330 tool (ArcGIS) calculates the density of features (here influenza cases) in a certain area and  
17 331 generates a surface for each feature. Then the values of all overlaying kernel surfaces are  
18 332 summed up for each raster cell, resulting in a raster data set showing the kernel density. The  
19 333 kernel density are calculated for the influenza datasets of seasons 2013/2014, 2014/2015,  
20 334 2015/2016, 2016/2017, and 2017/2018, as well as for the influenza cases of all seasons at  
21 335 once. The resulting raster dataset are reclassified into five shares (5 for highest, 1 for lowest  
22 336 values) based on Jenks natural breaks. This raster dataset is then converted into polygon  
23 337 features using the raster-to-feature tool in order to allow more options in terms of cartography  
24 338 (raster datasets can only be displayed in uniform/blank colors; no outlines or hatching  
25 339 possible).  
26  
27  
28  
29 340

#### 30 341 *B1. Household survey*

31 342 The data from the questionnaires is documented in a database (SPSS version 25). A  
32 343 codebook for each variable was determined. Next, we perform a data cleansing, rejecting  
33 344 incompletely filled out questionnaires from the system at entry. Then, a thorough data cleaning  
34 345 and editing process is carried out including harmonization of codes, words and terms given in  
35 346 free answers, and recoding such answers into new codes and labels, thus creating new  
36 347 standardized variables from the original data. This includes identifying incomplete data and  
37 348 assigning missing values, detecting and correcting coarse data or removing inaccurate  
38 349 records from the database. The data cleaning also involves validity checks, i.e. validating and  
39 350 correcting values against a prespecified list of possible options (such as value labels). The  
40 351 coding is checked for each variable for the entire database in respect to the hierarchical order  
41 352 and determine if certain variables should be recoded. As the questionnaires are uniquely  
42 353 identified by urban quarters, and an identification number which is also entered into the data  
43 354 entry mask, we can compare original questionnaire data to data entered in the statistics  
44 355 program and thereby crosscheck cases that seem to be inconsistent with codes used.  
45  
46  
47  
48 356

49 357 *Data classification.* From variables such as date of birth, a new variable is created which  
50 358 defines age groups. From the two variables persons per household and square meters per  
51 359 household, a new variable is created which uses stated square meters per person to give an  
52 360 indication of residential density. Socioeconomic factors of all postal-code districts of the city  
53 361 of Basel will be summarized as counts (medians and interquartile ranges) for continuous  
54 362 variables and proportions and percentages for categorical variables. Responses of all  
55 363 participants will be summarized as counts (medians and interquartile ranges) for continuous  
56 364 variables and proportions and percentages for categorical variables and summarized for each  
57 365 postal-code district.  
58  
59  
60 366

1  
2  
3 367 *Data enhancement and appendices.* The data set is also enhanced by additional information  
4 368 e.g. we analyze the variable of the self-stated medication of the respondents and classified it  
5 369 according to the Anatomical Therapeutic Chemical Classification (ATC) system used by the  
6 370 WHO. Thereby study participants can be classified into a risk group and non-risk group for  
7 371 influenza, according to their ATC-Level. The gained information is entered as new variables.  
8 372 We also include the location of a surveyed person within the urban quarter. This information  
9 373 is obtained from surveyed persons who precisely locate their place of residence on a map or  
10 374 by roughly indicating their location within a grid map of the city that we developed for this  
11 375 purpose. Locations are georeferenced and added to the data set.  
12 376

13 377 *Data quality.* The data cleaning and harmonization procedure yields a data set that is accurate,  
14 378 complete and consistent, that allows us to go back to original source data (questionnaires),  
15 379 accounts for incomplete or missing values, and that conforms with data handling and  
16 380 anonymity requirements required by Swiss data protection laws and the regulations of the  
17 381 Ethics Commissions.  
18 382

### 19 383 *Data analysis.*

20 384 Various demographic, epidemiological and geographical variables will be compared regarding  
21 385 the outcome variables. The primary outcomes of the household survey are (i) reported ILI and  
22 386 (ii) reported influenza vaccine status. Variables and endpoint data was descriptively analyzed  
23 387 using SPSS (version 25), Stata (version 15.1), and Prism (7.0d, 2017; www.graphpad.com).  
24 388 Data will be shown as median and interquartile ranges for continuous data and absolute  
25 389 numbers and percentage for categorical data. The statistical methods used to estimate an  
26 390 association between the variables are based on studies with similar topics (17-21).  
27 391

### 28 392 *Analytical analysis.*

29 393 Comparisons between different postal-code areas: Different socioeconomic measures will be  
30 394 compared between the different postal-code districts by chi-square tests (or the Fisher's exact  
31 395 test, when appropriate) for categorical variables and by the Kruskal-Wallis-Test for continuous  
32 396 variables. Summary measures of individual risk factors for influenza will be compared between  
33 397 the different postal-code districts by chi-square tests (or the Fisher's exact test, when  
34 398 appropriate) for categorical variables and by the Kruskal-Wallis-Test for continuous variables.  
35 399 Outcome variables will be compared between the different postal-code districts by chi-square  
36 400 tests (or the Fisher's exact test, when appropriate) for categorical variables and by the Kruskal-  
37 401 Wallis-Test for continuous variables.  
38 402

39 403 Individual risk factors and postal-code district related socioeconomic factors and their  
40 404 associations with ILI: Relative risks for ILI will be estimated by Poisson regression with robust  
41 405 error variance. To deal with possible confounding, all variables found to differ significantly in  
42 406 univariable analyses between participants with and without ILI will be included in the  
43 407 multivariable, multilevel mixed-effects generalized linear model.  
44 408

45 409 Individual risk factors and postal-code district related socioeconomic factors and their  
46 410 associations with influenza-vaccination: Relative risks for influenza vaccination will be  
47 411 estimated by Poisson regression with robust error variance. To deal with possible  
48 412 confounding, all variables found to differ significantly in univariable analyses between  
49 413 participants with and without influenza vaccination will be included in the multivariable,  
50 414 multilevel mixed-effects generalized linear model.

1  
2  
3 415  
4 416 Model checking: The Pearson and deviance goodness-of-fit tests will be performed to assess  
5 417 the fit of the data to a Poisson distribution in the final regression models. Furthermore, the  
6 418 distributions of the deviance residuals will be analysed.  
7 419

8 419  
9 420 Sensitivity analyses: The final regression models will be repeated after exclusion of outliers in  
10 421 the dataset and with changing some of the underlying baseline assumptions (depends on the  
11 422 variables to be included).  
12 423

13 423

14 424

### 15 425 *B2. Influenza transmission.*

16 426 The combined analysis of the viral sequencing data, the metadata from the Statistics Office of  
17 427 the Canton Basel-City, and the two questionnaires is done using phylodynamic methods. The  
18 428 data collected in the questionnaires filled out by the patients is cleaned up and processed  
19 429 analog to the data in B1.

20 429  
21 430 In phylodynamics the transmission chain between hosts is reconstructed using the sequenced  
22 431 influenza genomes. We assume that two hosts with very similar viral genomes are close to  
23 432 each other in the transmission chain, whereas two hosts, which have very distanced viral  
24 433 genomes are far apart in the transmission chain. The reconstructed transmission chain is  
25 434 typically incomplete, as we cannot capture every single case in a city and the direction of  
26 435 transmission is not fully clear. We employ and extend the available phylodynamic framework  
27 436 within BEASTv2 (22) to allow the transmission rate to depend on host factors such as age,  
28 437 family status, or socio-economic characteristics. We aim to quantify the transmission rates as  
29 438 a function of the host factors. Intuitively, if say many adults cluster in the phylogeny, this  
30 439 indicates frequent ongoing transmission between adults, while if adults occur in children  
31 440 clades, this indicates frequent transmission from children to adults.  
32 439  
33 440  
34 441

35 441

### 36 442 *B3. Determination of herd immunity in health individuals.*

37 443 The herd immunity estimates per urban quarter as percentage above a sero-protection  
38 444 threshold is visualized using GIS mapping as previously described. The distribution of herd  
39 445 immunities in urban quarters will be correlated with incidence rates of influenza and  
40 446 transmission patterns.  
41 447

42 447

## 43 448 **Strength & limitations**

44 449

45 450 *Retrospective PCR-confirmed influenza cases.* From 2013 to 2018 all available cases are  
46 451 included. However, the included PCR-confirmed cases do not represent every single influenza  
47 452 case in the city. Many cases either presented at a family physician not participating in our  
48 453 study, or did not receive a diagnosis to confirm the viral infections. The number of ILI cases in  
49 454 the population is estimated to be 4-5% by the Federal Office of Public Health ([www.bag.ch](http://www.bag.ch)) –  
50 455 this would correspond to between 7000 and 8700 cases in the city of Basel. Based on our  
51 456 experience from the emergency department, around 50% of ILI cases can be attributed to  
52 457 Influenza viruses. Therefore, we would expect around 3500 to 4300 PCR-confirmed influenza  
53 458 cases. To capture every single case of influenza will not be possible.  
54 459

55 459

56 459  
57 460 *Prospective household survey.* Given the distribution of the foreign-born or persons in the  
58 461 urban quarter who speak other languages than German (Table 2), the Basel Cantonal  
59 462 Statistics Office provides the total number of households to be surveyed and the number of

1  
2  
3 463 households that should receive questionnaires in the major foreign languages (Table 3).  
4 464 Nevertheless, a language bias is likely induced into the questionnaire as not every spoken  
5 465 language could be captured with the questionnaire. Data entry and data handling errors can  
6 466 almost be excluded. In population (census) surveys performed by the Federal Office of  
7 467 Statistics of Switzerland, a 6% error margin is usually expected.

8 468 Finally, for logistic and cost reasons, we cannot distribute the household survey to all 19 official  
9 469 urban quarters but focus our questionnaire on 10 selected quarters. Although this might induce  
10 470 a certain selection bias, we feel that the included quarters reflect the diversity similar in a  
11 471 representative number. Also, the questionnaires distributed and received per quarters allows  
12 472 us to perform a statistical representative analysis.  
13 473

14 474 *Prospective study of influenza transmission.* The prospective trial aims to include as many  
15 475 influenza infected patients as possible. The recruitment is distributed at sites with large  
16 476 influenza case numbers. However, recruitment may have introduced a certain bias of study  
17 477 participants. Some patients will not present at a physician or emergency ward and therefore  
18 478 will not be diagnosed but still contribute to the transmission chain. This may be particularly  
19 479 true for children, where PCR-based influenza diagnostics is rarely used.  
20 480

21 481 *Prospective measurement of antibody titers in healthy individuals.* The measurement of herd  
22 482 immunity per quarter is based on the recruitment of healthy blood donors. The study  
23 483 participants may not reflect the average citizen of Basel.  
24 484

## 25 485 **Discussion**

26 486 Profound knowledge on the key geographical, epidemiological and immunological factors  
27 487 influencing influenza transmission in a city will significantly help to develop effective counter  
28 488 measurements. The project is performed during the several subsequent years and large  
29 489 interconnected datasets are collected. The retrospective study parts clearly will show typical  
30 490 bias of a retrospective analysis such as missing data. In the prospective study part, the  
31 491 questionnaire may have a reply bias in the sense that influenza and vaccine interested people  
32 492 are more likely to respond. In addition, during patient recruitment not all influenza cases will  
33 493 be captured by the study. In the prospective study part, we include patients with influenza-like  
34 494 illness and use in a second step a PCR to confirm an influenza infection. However, as with the  
35 495 retrospective study, not all patients with influenza infection can be captured within a city as  
36 496 only symptomatic and patients presenting at the family doctor will be included.  
37 497

38 498 We have recently finished the recruitment for the study and started with data analysis and  
39 499 manuscript writing. We expect that results will be available by end of 2019.  
40 500

## 41 501 **Ethics and dissemination**

42 502 The study is approved by the regional ethics committee as observational study (EKNZ project  
43 503 ID 2015–363 and 2016-01735). The study is registered at [clinicaltrials.gov](http://clinicaltrials.gov) (NCT03010007 on  
44 504 22<sup>nd</sup> December 2016). The results of this study will be published in peer-reviewed medical  
45 505 journals.  
46 506

47 507 We plan to present the results of this research project at national and international scientific  
48 508 meetings. We aim to publish our results in open-access journals so they are widely available  
49 509 to interested international audiences. We aim to make our sequencing data available to the  
50 60



1  
2  
3 510 research community so that distribution of viruses can be assessed on both a national and  
4 511 international level.

5 512

6  
7 513 **List of abbreviations**

8 514 WGS, whole genome sequencing

9 515 PCR, polymerase chain reaction

10 516 ILI, influenza-like illness

11 517 GIS, geographic information system

12  
13  
14  
15  
16  
17  
18  
19  
20  
21  
22  
23  
24  
25  
26  
27  
28  
29  
30  
31  
32  
33  
34  
35  
36  
37  
38  
39  
40  
41  
42  
43  
44  
45  
46  
47  
48  
49  
50  
51  
52  
53  
54  
55  
56  
57  
58  
59  
60

For peer review only

518 **Tables**

For peer review only

1  
2  
3  
4  
5  
6  
7  
8  
9  
10  
11  
12  
13  
14  
15  
16  
17  
18  
19  
20  
21  
22  
23  
24  
25  
26  
27  
28  
29  
30  
31  
32  
33  
34  
35  
36  
37  
38  
39  
40  
41  
42  
43  
44  
45  
46  
47  
48  
49  
50  
51  
52  
53  
54  
55  
56  
57  
58  
59  
60

1  
2  
3  
4  
5  
6  
7  
8  
9  
10  
11  
12  
13  
14  
15  
16  
17  
18  
19  
20  
21  
22  
23  
24  
25  
26  
27  
28  
29  
30  
31  
32  
33  
34  
35  
36  
37  
38  
39  
40  
41  
42  
43  
44  
45  
46

**Table 1. Representative sample of the household survey.** <sup>1</sup> The necessary number of questionnaires was calculated with an expected response rate of 12% and, due to statistical calculations, this means more households should have received a questionnaire than there actually are in Kleinhüningen. Source: Population Statistics 2014, Canton Basel-City

| Urban quarter              | No. of private households in the quarter (N) | Minimum required returns (n) | No. of necessary distributed questionnaires (if 12% response rate) |
|----------------------------|----------------------------------------------|------------------------------|--------------------------------------------------------------------|
| Am Ring                    | 5456                                         | 359                          | 2991                                                               |
| Gundeldingen               | 10085                                        | 370                          | 3084                                                               |
| Bruderholz                 | 4038                                         | 351                          | 2924                                                               |
| Bachletten                 | 6710                                         | 363                          | 3028                                                               |
| Gotthelf                   | 3764                                         | 349                          | 2906                                                               |
| Iselin                     | 8860                                         | 368                          | 3069                                                               |
| St. Johann                 | 9180                                         | 369                          | 3073                                                               |
| Matthäus                   | 8012                                         | 367                          | 3055                                                               |
| Klybeck                    | 3506                                         | 346                          | 2886                                                               |
| Kleinhüningen <sup>1</sup> | 1291                                         | 296                          | 2469                                                               |
| Total of 10 urban district | 60902                                        | 3538                         | 29485                                                              |

**Table 2. Distribution of foreign-born population and foreign languages in the urban district of Basel.** Population and foreign-born population were determined for November 2015. Number of private households was determined for 2014. Official language Montenegro: a.o. regional Serbo-Croatian and Albanian; Serbia: Serbo-Croatian; Kosovo: Albanian, Serbo-Croatian, Turkish.

| Urban district | Population    | Number of private households | Foreign born pop. | Foreign population by citizenship as a percentage of all foreigners in the urban quarter (March 2015) |                        |                       |                                    |
|----------------|---------------|------------------------------|-------------------|-------------------------------------------------------------------------------------------------------|------------------------|-----------------------|------------------------------------|
|                |               |                              |                   | Largest segment of the foreign population                                                             | Second largest segment | Third largest segment | Fourth largest segment             |
| Am Ring        | 10666         | 5456                         | 3636              | Germany (27%)                                                                                         | Italy (10.3%)          | Spain (5.9%)          | United Kingdom (4.7%)              |
| Gundeldingen   | 18917         | 10085                        | 7497              | Germany (20.5%)                                                                                       | Turkey (14.9%)         | Italy (12.7%)         | Serbia, Montenegro, Kosovo (9.8%)  |
| Bruderholz     | 9068          | 4038                         | 2098              | Germany (32.6%)                                                                                       | Italy (11.8%)          | UK (7.5%)             | France (5.2%)                      |
| Bachletten     | 13549         | 6710                         | 2918              | Germany (32.3%)                                                                                       | Italy (13.2%)          | Spain (5.2%)          | United Kingdom (4.9%)              |
| Gotthelf       | 6883          | 3764                         | 1910              | Germany (32.2%)                                                                                       | Italy (12.5%)          | Turkey (4.9%)         | Spain (4.9%)                       |
| Iselin         | 16595         | 8860                         | 6092              | Germany (18.3%)                                                                                       | Italy (15%)            | Turkey (12.6%)        | Serbia, Montenegro, Kosovo (7%)    |
| St. Johann     | 18835         | 9180                         | 8245              | Germany (17.2%)                                                                                       | Turkey (12.2%)         | Italy (10.8%)         | Portugal (8.7%)                    |
| Matthäus       | 16303         | 8012                         | 8403              | Germany (17%)                                                                                         | Italy (10.8%)          | Turkey (10.6%)        | Serbia, Montenegro, Kosovo (10.5%) |
| Klybeck        | 7331          | 3506                         | 3813              | Turkey (16.7%)                                                                                        | Italy (15.5%)          | Germany (11.3%)       | Serbia, Montenegro, Kosovo (10.9%) |
| Kleinhüningen  | 2900          | 1291                         | 1553              | Italy (15.7%)                                                                                         | Germany (14.5%)        | Turkey (14.3%)        | Serbia, Montenegro, Kosovo (10.5%) |
| <b>Total</b>   | <b>121047</b> | <b>60902</b>                 | <b>46165</b>      |                                                                                                       |                        |                       |                                    |

1  
2  
3  
4  
5  
6  
7  
8  
9  
10  
11  
12  
13  
14  
15  
16  
17  
18  
19  
20  
21  
22  
23  
24  
25  
26  
27  
28  
29  
30  
31  
32  
33  
34  
35  
36  
37  
38  
39  
40  
41  
42  
43  
44  
45  
46

**Table 3. Number of households to be surveyed in selected urban quarters and languages provided.**

|               | Number of private households | Questionnaires needed when return rate 12% | German, English, Italian | Serbo-Croatian | Albanian | Turkish | Household questionnaire ratio | / Distribution Each household | Every other household | Every third household |
|---------------|------------------------------|--------------------------------------------|--------------------------|----------------|----------|---------|-------------------------------|-------------------------------|-----------------------|-----------------------|
| Kleinhüningen | 1291                         | 2469                                       | x                        | x              | x        | x       | 0,52                          | x                             |                       |                       |
| Klybeck       | 3506                         | 2886                                       | x                        | x              | x        | x       | 1,21                          | x                             |                       |                       |
| Matthäus      | 8012                         | 3055                                       | x                        | x              | x        | x       | 2,62                          |                               | x                     |                       |
| St. Johann    | 9180                         | 3073                                       | x                        |                |          | x       | 2,99                          |                               |                       | x                     |
| Iselin        | 8860                         | 3069                                       | x                        | x              | x        | x       | 2,89                          |                               |                       | x                     |
| Gotthelf      | 3764                         | 2906                                       | x                        |                |          |         | 1,30                          | x                             |                       |                       |
| Am Ring       | 5456                         | 2991                                       | x                        |                |          |         | 1,82                          |                               | x                     |                       |
| Bachletten    | 6710                         | 3028                                       | x                        |                |          |         | 2,22                          |                               | x                     |                       |
| Gundeldingen  | 10085                        | 3084                                       | x                        | x              | x        | x       | 3,27                          |                               |                       | x                     |
| Bruderholz    | 4038                         | 2924                                       | x                        |                |          |         | 1,38                          | x                             |                       |                       |
| Total         |                              |                                            | 29485                    | 14563          | 14563    | 20542   |                               |                               |                       |                       |

## Figures

### Figure legends

**Figure 1. Study overview.** Retrospective analysis of PCR-confirmed cases and household survey. Prospective collection of influenza virus isolates for WGS analysis and measurement of hemagglutination inhibition assay (HIA) titers from serum of healthy donors.

**Figure 2. Urban quarters of the Canton of Basel-City included into the household survey.** The 10 selected urban quarters are highlighted, selected on influenza incidences and known socioeconomic differences. Base map data: Department of construction and traffic of the Canton Basel-City, land charge register, specialist department for geoinformatics.

**Figure 1.**

For peer review only

1  
2  
3  
4  
5  
6  
7  
8  
9  
10  
11  
12  
13  
14  
15  
16  
17  
18  
19  
20  
21  
22  
23  
24  
25  
26  
27  
28  
29  
30  
31  
32  
33  
34  
35  
36  
37  
38  
39  
40  
41  
42  
43  
44  
45  
46  
47  
48  
49  
50  
51  
52  
53  
54  
55  
56  
57  
58  
59  
60

1  
2  
3 **Figure 2.**  
4  
5  
6  
7  
8  
9  
10  
11  
12  
13  
14  
15  
16  
17  
18  
19  
20  
21  
22  
23  
24  
25  
26  
27  
28  
29  
30  
31  
32  
33  
34  
35  
36  
37  
38  
39  
40  
41  
42  
43  
44  
45  
46  
47  
48  
49  
50  
51  
52  
53  
54  
55  
56  
57  
58  
59  
60

For peer review only



## Declarations

*Ethics approval and consent to participate:* The study is approved by the regional ethical review board (Project-ID 2015–363 and 2016-01735).

*Consent for publication:* Written informed consent is provided by every patient or legal representative.

*Availability of data and material:* Data analysis is ongoing, however, we will publish all WGS data of the patient in public repositories for WGS data. Data sharing is not applicable to this article as no datasets were generated or analyzed during the current study.

*Competing interests:* None

*Funding:* This work is supported by the Swiss National Science Foundation (interdisciplinary research grant CR3213\_166258/1; www.snsf.ch) and a grant by the Freiwillige Akademische Gesellschaft, Basel (www.fag.ch). AE received a salary grant by the Swiss National Science Foundation (Ambizione PZ00P3\_154709 /1).

*Author contributions:* AE, MBa, RSS and TS planned the study and reviewed the paper. AE drafted the first version paper. DW, DMM, and HMBSS advised on sequencing methodology. DW, HMBSS, TS, and NM advised on phylogenetic analysis and reviewed the paper. NA, MB, JB (Geography) generate GIS maps. AE, DV, YH, ER, OD, MN, AZ, STS, CHN, AB, NR, and NM provide data and samples. AE, NG, CS, TV, RSS planned and conducted the questionnaire. DV, MS organized biobanking, CS, MB, TV, MS, NG, NAS, TS, RSS performed data entry.

## Acknowledgements

We would like to thank the clinical trial unit (Karin Wild and Silke Puschke) for organizational help with the prospective study part.

Finally, we thank the family doctors for helping in the patient recruitment:

- Dr. Schneider and Dr. von Hornstein, Gundeldingen
- Gemeinschaftspraxis Dornacherstrasse, Gundeldingen (Dres. Bruger, Eggenschwilder, Wyss Lustenberger, Gessler, Nonnemacher)
- Praxisgemeinschaft Bruderholz (Dres. Dreyfus and Gürke), Bruderholz
- Dr. Marti, Bachletten
- Praxis Büdnerhof (Dres Müller, Peters and Hantke), Büdnerhof
- Dr. Banderet and Dr. Malè, Iselin
- Dres. Legendre and Legendre, St. Johann
- Davidsbodenpraxis (Dres. Hug and Isay-Utzinger), St. Johann
- Praxis Dr. Bär (Dres. Bär and Türkoglu), St. Johann
- Hammerpraxis (Prof. Zeller), Matthäus
- Dr. Gordon and Dr. Landolt, Clara
- Dr. Buess, Am Ring

**References:**

1. Stockton J, Ellis JS, Saville M, Clewley JP, Zambon MC. Multiplex PCR for typing and subtyping influenza and respiratory syncytial viruses. *J Clin Microbiol.* 1998;36(10):2990-5.
2. Thai PQ, Mai le Q, Welkers MR, Hang Nle K, Thanh le T, Dung VT, et al. Pandemic H1N1 virus transmission and shedding dynamics in index case households of a prospective Vietnamese cohort. *J Infect.* 2014;68(6):581-90.
3. Ziegler T, Hall H, Sanchez-Fauquier A, Gamble WC, Cox NJ. Type- and subtype-specific detection of influenza viruses in clinical specimens by rapid culture assay. *J Clin Microbiol.* 1995;33(2):318-21.
4. McCrone JT, Woods RJ, Martin ET, Malosh RE, Monto AS, Luring AS. Stochastic processes constrain the within and between host evolution of influenza virus. *Elife.* 2018;7.
5. Houghton R, Ellis J, Galiano M, Clark TW, Wyllie S. Haemagglutinin and neuraminidase sequencing delineate nosocomial influenza outbreaks with accuracy equivalent to whole genome sequencing. *J Infect.* 2017;74(4):377-84.
6. Pagani L, Thomas Y, Huttner B, Sauvan V, Notaridis G, Kaiser L, et al. Transmission and effect of multiple clusters of seasonal influenza in a Swiss geriatric hospital. *J Am Geriatr Soc.* 2015;63(4):739-44.
7. Valley-Omar Z, Nindo F, Mudau M, Hsiao M, Martin DP. Phylogenetic Exploration of Nosocomial Transmission Chains of 2009 Influenza A/H1N1 among Children Admitted at Red Cross War Memorial Children's Hospital, Cape Town, South Africa in 2011. *PLoS One.* 2015;10(11):e0141744.
8. Virk RK, Gunalan V, Lee HK, Inoue M, Chua C, Tan BH, et al. Molecular Evidence of Transmission of Influenza A/H1N1 2009 on a University Campus. *PLoS One.* 2017;12(1):e0168596.
9. Ghedin E, Sengamalay NA, Shumway M, Zaborsky J, Feldblyum T, Subbu V, et al. Large-scale sequencing of human influenza reveals the dynamic nature of viral genome evolution. *Nature.* 2005;437(7062):1162-6.
10. Bloom-Feshbach K, Alonso WJ, Charu V, Tamerius J, Simonsen L, Miller MA, et al. Latitudinal variations in seasonal activity of influenza and respiratory syncytial virus (RSV): a global comparative review. *PLoS One.* 2013;8(2):e54445.
11. Sammon CJ, McGrogan A, Snowball J, de Vries CS. Factors associated with uptake of seasonal and pandemic influenza vaccine among clinical risk groups in the UK: an analysis using the General Practice Research Database. *Vaccine.* 2012;30(14):2483-9.
12. Tamerius JD, Shaman J, Alonso WJ, Bloom-Feshbach K, Uejio CK, Comrie A, et al. Environmental predictors of seasonal influenza epidemics across temperate and tropical climates. *PLoS Pathog.* 2013;9(3):e1003194.
13. Walter D, Bohmer MM, Heiden M, Reiter S, Krause G, Wichmann O. Monitoring pandemic influenza A(H1N1) vaccination coverage in Germany 2009/10 - results from thirteen consecutive cross-sectional surveys. *Vaccine.* 2011;29(23):4008-12.
14. Yu H, Alonso WJ, Feng L, Tan Y, Shu Y, Yang W, et al. Characterization of regional influenza seasonality patterns in China and implications for vaccination strategies: spatio-temporal modeling of surveillance data. *PLoS Med.* 2013;10(11):e1001552.

15. Wuthrich D, Lang D, Muller NF, Neher RA, Stadler T, Egli A. Evaluation of two workflows for whole genome sequencing-based typing of influenza A viruses. *J Virol Methods*. 2019;266:30-3.
16. Kaufmann L, Syedbasha M, Vogt D, Hollenstein Y, Hartmann J, Linnik JE, et al. An Optimized Hemagglutination Inhibition (HI) Assay to Quantify Influenza-specific Antibody Titers. *J Vis Exp*. 2017(130).
17. Vaux S, Van Cauteren D, Guthmann JP, Le Strat Y, Vaillant V, de Valk H, et al. Influenza vaccination coverage against seasonal and pandemic influenza and their determinants in France: a cross-sectional survey. *BMC Public Health*. 2011;11:30.
18. Raude J, Setbon M. Predicting the lay preventive strategies in response to avian influenza from perceptions of the threat. *PLoS One*. 2011;6(9):e24943.
19. Bohmer MM, Walter D, Muters S, Krause G, Wichmann O. Seasonal influenza vaccine uptake in Germany 2007/2008 and 2008/2009: results from a national health update survey. *Vaccine*. 2011;29(27):4492-8.
20. Bohmer MM, Walter D, Krause G, Muters S, Gosswald A, Wichmann O. Determinants of tetanus and seasonal influenza vaccine uptake in adults living in Germany. *Hum Vaccin*. 2011;7(12):1317-25.
21. Dunlop S, Coyte PC, McIsaac W. Socio-economic status and the utilisation of physicians' services: results from the Canadian National Population Health Survey. *Social Science & Medicine*. 2000;51:123-33.
22. Bouckaert R, Heled J, Kuhnert D, Vaughan T, Wu CH, Xie D, et al. BEAST 2: a software platform for Bayesian evolutionary analysis. *PLoS Comput Biol*. 2014;10(4):e1003537.



Figure 1. Study overview. Retrospective analysis of PCR-confirmed cases and household survey. Prospective collection of influenza virus isolates for WGS analysis and measurement of hemagglutination inhibition assay (HIA) titers from serum of healthy donors.

338x190mm (108 x 90 DPI)



Figure 2. Urban quarters of the Canton of Basel-City included into the household survey. The 10 selected urban quarters are highlighted, selected on influenza incidences and known socioeconomic differences. Base map data: Department of construction and traffic of the Canton Basel-City, land charge register, specialist department for geoinformatics.

338x190mm (300 x 300 DPI)

## Befragung zu Grippeerkrankungen in der Stadt Basel

Im Rahmen eines Forschungsprojekts zu Grippeerkrankungen in der Stadt Basel führen wir eine Befragung in ausgewählten Basler Quartieren durch.

Die Teilnahme an der Umfrage dauert circa 15 Minuten und ist freiwillig. Ihre Anonymität wird gewährleistet. Wir bitten Sie, diese Broschüre mit Ihrem ausgefüllten Fragebogen bis zum 1. Mai 2016 mit dem vorfrankierten Rückumschlag zurückzusenden.

Teilnehmende Personen können an einem Gewinnspiel teilnehmen (Apple Laptop im Wert von CHF 2500.- und zwei Pro Innerstadt-Gutscheine im Wert von je CHF 500.-). Siehe Ende des Fragebogens. Vielen Dank für Ihre Mitwirkung.

### A. Grippe und Erkältung

#### A.1. Waren Sie in diesem Winter oder Frühling stark erkältet?

- <sub>1</sub> nein (falls nein, bitte weiter mit Frage A6)    <sub>2</sub> ja, mehrfach    <sub>3</sub> ja, einmal  
 Falls ja, in welchem/n Monat(en): \_\_\_\_\_  
 Falls ja, wie viele Tage waren Sie dadurch im Alltag deutlich eingeschränkt? \_\_\_\_\_

#### A.2. Welche Beschwerden hatten Sie? (Mehrfachnennungen möglich)

- <sub>1</sub> Fieber (über 38 Grad)    <sub>3</sub> Muskel- und Gliederschmerzen    <sub>5</sub> Husten    <sub>7</sub> Halsschmerzen    <sub>9</sub> laufende Nase  
<sub>2</sub> Durchfall    <sub>4</sub> starke Müdigkeit    <sub>6</sub> Kopfschmerzen    <sub>8</sub> starkes Krankheitsgefühl

#### A.3. Ist sonst noch jemand mit den gleichen Beschwerden (Grippe/Erkältung) in Ihrem näheren Umfeld krank gewesen?

- <sub>1</sub> nein    <sub>2</sub> ja    <sub>3</sub> weiss nicht  
 Falls ja, Personen (Mehrfachnennungen möglich):  
<sub>1</sub> in der Familie    <sub>2</sub> bei der Arbeit    <sub>3</sub> in der Nachbarschaft    <sub>4</sub> im Freundeskreis    <sub>5</sub> im Verein

#### A.4. Haben Sie wegen der Erkältungs-Beschwerden eine Fachperson aufgesucht?

- <sub>1</sub> nein    <sub>2</sub> ja  
 Falls ja, wo?  
<sub>1</sub> Arztpraxis    <sub>2</sub> Spital    <sub>3</sub> Apotheke    <sub>4</sub> andere, und zwar: \_\_\_\_\_

#### A.5. Haben Sie zur Behandlung der Erkältung Medikamente eingenommen?

- <sub>1</sub> nein    <sub>2</sub> ja  
 Falls ja, haben Sie Tamiflu erhalten?  
<sub>1</sub> ja    <sub>2</sub> nein

#### A.6. Haben Sie sich im Herbst/Winter 2015/16 gegen Grippe impfen lassen?

- <sub>1</sub> nein    <sub>2</sub> ja  
 Falls ja, wo:    <sub>1</sub> Arztpraxis    <sub>2</sub> Apotheke    <sub>3</sub> Spital    <sub>4</sub> woanders, und zwar: \_\_\_\_\_  
 Falls ja, in welchem Monat? \_\_\_\_\_

Falls nein: Warum haben Sie sich nicht geimpft? (Bitte kreuzen Sie alle relevanten Punkte an)

- <sub>1</sub> Ich weiss nicht, warum ich mich impfen lassen sollte.    <sub>7</sub> Freunde/Angehörige haben schlechte Erfahrungen damit gemacht.  
<sub>2</sub> Ich wollte eigentlich, aber habe es dann doch nicht getan.    <sub>8</sub> Ich scheue mich vor den Nebenwirkungen.  
<sub>3</sub> Ich glaube nicht an die Wirkung der Impfung.    <sub>9</sub> Spritzen sind mir unangenehm.  
<sub>4</sub> Eine richtige Grippe stärkt mein Immunsystem mehr und der Schutz hält länger.    <sub>10</sub> Die Impfung wurde mir von Fachpersonen (Arzt/Apotheker) nicht empfohlen.  
<sub>5</sub> Das ist mir zu teuer.    <sub>11</sub> Anderer Grund, und zwar: \_\_\_\_\_  
<sub>6</sub> Ich stärke meine Abwehr mit anderen Mitteln.

Falls ja: Warum haben Sie sich geimpft? (Bitte kreuzen Sie alle relevanten Punkte an)

- <sub>1</sub> Ich möchte keine Grippe bekommen.    <sub>4</sub> Die Impfung wurde mir von Angehörigen/Freunden empfohlen.  
<sub>2</sub> Ich möchte nicht bei der Arbeit fehlen.    <sub>5</sub> Die Impfung wurde mir am Arbeitsplatz empfohlen.  
<sub>3</sub> Ich habe Freunde/Angehörige, die ich vor der Grippe schützen möchte.    <sub>6</sub> Die Impfung wurde mir von Fachpersonen (Arzt/Apotheker) empfohlen.  
<sub>7</sub> Anderer Grund, und zwar: \_\_\_\_\_

**A.7. Falls Sie sich dieses Jahr gegen Grippe geimpft haben, geben Sie Ihre Erfahrungen auf einer Skala von 1 (sehr negativ) bis 10 (sehr positiv) an:**

<sub>1</sub> 1    <sub>2</sub> 2    <sub>3</sub> 3    <sub>4</sub> 4    <sub>5</sub> 5    <sub>6</sub> 6    <sub>7</sub> 7    <sub>8</sub> 8    <sub>9</sub> 9    <sub>10</sub> 10  
sehr negativ sehr positiv

Falls **positive** Erfahrungen, welche: \_\_\_\_\_

Falls **negative** Erfahrungen, welche: \_\_\_\_\_

**A.8. Lassen Sie sich regelmässig gegen Grippe impfen?**

<sub>1</sub> nein    <sub>2</sub> ja  
Falls ja, seit wie vielen Jahren: \_\_\_\_\_

**A.9. Haben Sie in der Vergangenheit andere vom Arzt empfohlene Impfungen für sich selbst oder für Ihre Kinder abgelehnt?**

<sub>1</sub> nein, nie    <sub>2</sub> ja, aber nur gewisse Impfungen    <sub>3</sub> ja, alle Impfungen

**A.10. Wie schätzen Sie Ihren allgemeinen Gesundheitszustand auf einer Skala von 1 (sehr negativ) bis 10 (sehr positiv) ein?**

<sub>1</sub> 1    <sub>2</sub> 2    <sub>3</sub> 3    <sub>4</sub> 4    <sub>5</sub> 5    <sub>6</sub> 6    <sub>7</sub> 7    <sub>8</sub> 8    <sub>9</sub> 9    <sub>10</sub> 10  
sehr negativ sehr positiv

**A.11. Haben Sie eine Hausärztin oder einen Hausarzt?**

<sub>1</sub> nein    <sub>2</sub> ja

**A.12. Haben Sie chronische Krankheiten, wegen denen Sie täglich Medikamente einnehmen müssen (mindestens seit 6 Monaten)?**

<sub>1</sub> nein    <sub>2</sub> ja  
Falls ja, welche Medikamente: \_\_\_\_\_

**A.13. Rauchen Sie?**

<sub>1</sub> nein    <sub>2</sub> ja, gelegentlich    <sub>3</sub> ja, täglich (Anzahl Päckchen pro Tag) \_\_\_\_\_    <sub>4</sub> keine Angabe

**A.14. Trinken Sie Alkohol?**

<sub>1</sub> nein    <sub>2</sub> ja, gelegentlich    <sub>3</sub> ja, täglich    <sub>4</sub> keine Angabe

**A.15. Für wie wichtig halten Sie folgende Massnahmen um einer Grippe vorzubeugen?**

|                                    | wichtig                               | eher wichtig                          | neutral                               | eher unwichtig                        | unwichtig                             | weiss nicht                           | keine Angabe                          |
|------------------------------------|---------------------------------------|---------------------------------------|---------------------------------------|---------------------------------------|---------------------------------------|---------------------------------------|---------------------------------------|
| Impfen                             | <input type="checkbox"/> <sub>1</sub> | <input type="checkbox"/> <sub>2</sub> | <input type="checkbox"/> <sub>3</sub> | <input type="checkbox"/> <sub>4</sub> | <input type="checkbox"/> <sub>5</sub> | <input type="checkbox"/> <sub>6</sub> | <input type="checkbox"/> <sub>7</sub> |
| Händewaschen                       | <input type="checkbox"/> <sub>1</sub> | <input type="checkbox"/> <sub>2</sub> | <input type="checkbox"/> <sub>3</sub> | <input type="checkbox"/> <sub>4</sub> | <input type="checkbox"/> <sub>5</sub> | <input type="checkbox"/> <sub>6</sub> | <input type="checkbox"/> <sub>7</sub> |
| Gesundheits-Checkup beim Arzt      | <input type="checkbox"/> <sub>1</sub> | <input type="checkbox"/> <sub>2</sub> | <input type="checkbox"/> <sub>3</sub> | <input type="checkbox"/> <sub>4</sub> | <input type="checkbox"/> <sub>5</sub> | <input type="checkbox"/> <sub>6</sub> | <input type="checkbox"/> <sub>7</sub> |
| Gesunde Ernährung                  | <input type="checkbox"/> <sub>1</sub> | <input type="checkbox"/> <sub>2</sub> | <input type="checkbox"/> <sub>3</sub> | <input type="checkbox"/> <sub>4</sub> | <input type="checkbox"/> <sub>5</sub> | <input type="checkbox"/> <sub>6</sub> | <input type="checkbox"/> <sub>7</sub> |
| Regelmässige körperliche Aktivität | <input type="checkbox"/> <sub>1</sub> | <input type="checkbox"/> <sub>2</sub> | <input type="checkbox"/> <sub>3</sub> | <input type="checkbox"/> <sub>4</sub> | <input type="checkbox"/> <sub>5</sub> | <input type="checkbox"/> <sub>6</sub> | <input type="checkbox"/> <sub>7</sub> |
| Sonstige                           | <input type="checkbox"/> <sub>1</sub> | <input type="checkbox"/> <sub>2</sub> | <input type="checkbox"/> <sub>3</sub> | <input type="checkbox"/> <sub>4</sub> | <input type="checkbox"/> <sub>5</sub> | <input type="checkbox"/> <sub>6</sub> | <input type="checkbox"/> <sub>7</sub> |

sonstige, und zwar: \_\_\_\_\_

**A.16. Wie gut setzen Sie folgende Massnahmen Ihrer Meinung nach im Alltag um?**

|                                    | sehr gut                              | gut                                   | mittelmässig                          | schlecht                              | sehr schlecht                         | weiss nicht                           | keine Angabe                          |
|------------------------------------|---------------------------------------|---------------------------------------|---------------------------------------|---------------------------------------|---------------------------------------|---------------------------------------|---------------------------------------|
| Impfen                             | <input type="checkbox"/> <sub>1</sub> | <input type="checkbox"/> <sub>2</sub> | <input type="checkbox"/> <sub>3</sub> | <input type="checkbox"/> <sub>4</sub> | <input type="checkbox"/> <sub>5</sub> | <input type="checkbox"/> <sub>6</sub> | <input type="checkbox"/> <sub>7</sub> |
| Händewaschen                       | <input type="checkbox"/> <sub>1</sub> | <input type="checkbox"/> <sub>2</sub> | <input type="checkbox"/> <sub>3</sub> | <input type="checkbox"/> <sub>4</sub> | <input type="checkbox"/> <sub>5</sub> | <input type="checkbox"/> <sub>6</sub> | <input type="checkbox"/> <sub>7</sub> |
| Gesundheits-Checkup beim Arzt      | <input type="checkbox"/> <sub>1</sub> | <input type="checkbox"/> <sub>2</sub> | <input type="checkbox"/> <sub>3</sub> | <input type="checkbox"/> <sub>4</sub> | <input type="checkbox"/> <sub>5</sub> | <input type="checkbox"/> <sub>6</sub> | <input type="checkbox"/> <sub>7</sub> |
| Gesunde Ernährung                  | <input type="checkbox"/> <sub>1</sub> | <input type="checkbox"/> <sub>2</sub> | <input type="checkbox"/> <sub>3</sub> | <input type="checkbox"/> <sub>4</sub> | <input type="checkbox"/> <sub>5</sub> | <input type="checkbox"/> <sub>6</sub> | <input type="checkbox"/> <sub>7</sub> |
| Regelmässige körperliche Aktivität | <input type="checkbox"/> <sub>1</sub> | <input type="checkbox"/> <sub>2</sub> | <input type="checkbox"/> <sub>3</sub> | <input type="checkbox"/> <sub>4</sub> | <input type="checkbox"/> <sub>5</sub> | <input type="checkbox"/> <sub>6</sub> | <input type="checkbox"/> <sub>7</sub> |
| Sonstige                           | <input type="checkbox"/> <sub>1</sub> | <input type="checkbox"/> <sub>2</sub> | <input type="checkbox"/> <sub>3</sub> | <input type="checkbox"/> <sub>4</sub> | <input type="checkbox"/> <sub>5</sub> | <input type="checkbox"/> <sub>6</sub> | <input type="checkbox"/> <sub>7</sub> |

## B. Aspekte der städtischen Umwelt

### B.1. Wie oft benutzen Sie die folgenden Verkehrsmittel?

|                                              | täglich                    | mehrmals die Woche         | mehrmals im Monat          | seltener                   | nie                        | weiss nicht                | keine Angabe               |
|----------------------------------------------|----------------------------|----------------------------|----------------------------|----------------------------|----------------------------|----------------------------|----------------------------|
| Auto, Motorrad, Roller                       | <input type="checkbox"/> 1 | <input type="checkbox"/> 2 | <input type="checkbox"/> 3 | <input type="checkbox"/> 4 | <input type="checkbox"/> 5 | <input type="checkbox"/> 6 | <input type="checkbox"/> 7 |
| Öffentliche Verkehrsmittel (Bus, Tram, Bahn) | <input type="checkbox"/> 1 | <input type="checkbox"/> 2 | <input type="checkbox"/> 3 | <input type="checkbox"/> 4 | <input type="checkbox"/> 5 | <input type="checkbox"/> 6 | <input type="checkbox"/> 7 |
| Fahrrad                                      | <input type="checkbox"/> 1 | <input type="checkbox"/> 2 | <input type="checkbox"/> 3 | <input type="checkbox"/> 4 | <input type="checkbox"/> 5 | <input type="checkbox"/> 6 | <input type="checkbox"/> 7 |
| zu Fuss                                      | <input type="checkbox"/> 1 | <input type="checkbox"/> 2 | <input type="checkbox"/> 3 | <input type="checkbox"/> 4 | <input type="checkbox"/> 5 | <input type="checkbox"/> 6 | <input type="checkbox"/> 7 |
| anderes                                      | <input type="checkbox"/> 1 | <input type="checkbox"/> 2 | <input type="checkbox"/> 3 | <input type="checkbox"/> 4 | <input type="checkbox"/> 5 | <input type="checkbox"/> 6 | <input type="checkbox"/> 7 |

anderes, und zwar: \_\_\_\_\_

### B.2. Wie oft unternehmen Sie folgende Aktivitäten?

|                                                   | täglich                    | mehrmals die Woche         | mehrmals im Monat          | seltener                   | nie                        | weiss nicht                | keine Angabe               |
|---------------------------------------------------|----------------------------|----------------------------|----------------------------|----------------------------|----------------------------|----------------------------|----------------------------|
| Einkaufen in Einkaufshäusern (Coop, Migros, etc.) | <input type="checkbox"/> 1 | <input type="checkbox"/> 2 | <input type="checkbox"/> 3 | <input type="checkbox"/> 4 | <input type="checkbox"/> 5 | <input type="checkbox"/> 6 | <input type="checkbox"/> 7 |
| Kino                                              | <input type="checkbox"/> 1 | <input type="checkbox"/> 2 | <input type="checkbox"/> 3 | <input type="checkbox"/> 4 | <input type="checkbox"/> 5 | <input type="checkbox"/> 6 | <input type="checkbox"/> 7 |
| Restaurant/ Café/ Bar                             | <input type="checkbox"/> 1 | <input type="checkbox"/> 2 | <input type="checkbox"/> 3 | <input type="checkbox"/> 4 | <input type="checkbox"/> 5 | <input type="checkbox"/> 6 | <input type="checkbox"/> 7 |
| Kulturelle Veranstaltungen                        | <input type="checkbox"/> 1 | <input type="checkbox"/> 2 | <input type="checkbox"/> 3 | <input type="checkbox"/> 4 | <input type="checkbox"/> 5 | <input type="checkbox"/> 6 | <input type="checkbox"/> 7 |
| Sportveranstaltungen/spiele                       | <input type="checkbox"/> 1 | <input type="checkbox"/> 2 | <input type="checkbox"/> 3 | <input type="checkbox"/> 4 | <input type="checkbox"/> 5 | <input type="checkbox"/> 6 | <input type="checkbox"/> 7 |

### B.3. Mit wie vielen Personen haben Sie an einem regulären Wochentag schätzungsweise Kontakt (Arbeitsumfeld, Familie, Freunde, Vereine)?

1 0-10      2 10-50      3 50-100      4 mehr als 100

### B.4. Falls Sie erwerbstätig sind, haben Sie bei Ihrer Arbeit häufigen Kontakt mit anderen Menschen?

1 nein      2 ja      3 keine Angabe

### B.5. Arbeiten Sie im Gesundheitswesen mit Patientenkontakt (Medizinal- oder Pflegefachperson)?

1 nein      2 ja      3 keine Angabe

### B.6. Arbeiten Sie mit Kindern (Kindergarten, Spielgruppe, Kindertagesstätte, Schule etc.)?

1 nein      2 ja      3 keine Angabe

### B.7. Befindet sich Ihr Arbeitsplatz in einem Grossraumbüro bzw. in einem Raum mit vielen Menschen?

1 nein      2 ja      3 keine Angabe

### B.8. Fühlen Sie sich in Ihrem Wohnumfeld schädlichen Umwelteinflüssen ausgesetzt? (zum Beispiel: Abgase, Feinstaub, Elektromog, Lärm etc.)

1 nein      2 ja      3 keine Angabe

Wenn ja, welchen: \_\_\_\_\_

### B.9. Haben Sie diesen Herbst/Winter Personen im Spital oder Altersheim besucht?

1 nein      2 ja  
 Wenn ja, wie oft:  
1 1-4 mal      2 mehr als 5mal      3 Ich besuche regelmässig Personen in Gesundheitseinrichtungen.

### B.10. Betreuen Sie regelmässig pflegebedürftige Angehörige zu Hause?

1 nein      2 ja

### B.11. Leben Sie mit Personen zusammen, die an einer chronischen Erkrankung leiden?

1 nein      2 ja



## C. Informationsbeschaffung über Gesundheitsfragen

### C.1. Woher beziehen Sie Ihre Informationen zu Gesundheitsthemen? (Mehrfachnennungen möglich)

- <sub>1</sub> Ärztin / Arzt <sub>6</sub> TV  
<sub>2</sub> Apotheke <sub>7</sub> Radio  
<sub>3</sub> Soziales Umfeld (Freunde, Bekannte, Familie etc.) <sub>8</sub> Zeitungen und Zeitschriften  
<sub>4</sub> Religiös-kulturelles Umfeld <sub>9</sub> Soziale Netzwerke  
<sub>5</sub> Andere Informationsquelle und zwar: \_\_\_\_\_ <sub>10</sub> Internet, und zwar:  
<sub>11</sub> über Erfahrungsberichte anderer Personen  
<sub>12</sub> über offizielle Webseiten (Bundesamt für Gesundheit, Spital)  
<sub>13</sub> über andere Seiten: \_\_\_\_\_
- <sub>14</sub> Ich informiere mich nicht.

### C.2. Wie hilfreich finden Sie die angebotenen Informationen?

|                                                   | sehr<br>hilfreich                     | hilfreich                             | mittel                                | weniger<br>hilfreich                  | gar nicht<br>hilfreich                | weiss nicht                           | keine<br>Angabe                       |
|---------------------------------------------------|---------------------------------------|---------------------------------------|---------------------------------------|---------------------------------------|---------------------------------------|---------------------------------------|---------------------------------------|
| Ärztin / Arzt                                     | <input type="checkbox"/> <sub>1</sub> | <input type="checkbox"/> <sub>2</sub> | <input type="checkbox"/> <sub>3</sub> | <input type="checkbox"/> <sub>4</sub> | <input type="checkbox"/> <sub>5</sub> | <input type="checkbox"/> <sub>6</sub> | <input type="checkbox"/> <sub>7</sub> |
| Apotheke                                          | <input type="checkbox"/> <sub>1</sub> | <input type="checkbox"/> <sub>2</sub> | <input type="checkbox"/> <sub>3</sub> | <input type="checkbox"/> <sub>4</sub> | <input type="checkbox"/> <sub>5</sub> | <input type="checkbox"/> <sub>6</sub> | <input type="checkbox"/> <sub>7</sub> |
| Soziales Umfeld (Freunde, Bekannte, Familie etc.) | <input type="checkbox"/> <sub>1</sub> | <input type="checkbox"/> <sub>2</sub> | <input type="checkbox"/> <sub>3</sub> | <input type="checkbox"/> <sub>4</sub> | <input type="checkbox"/> <sub>5</sub> | <input type="checkbox"/> <sub>6</sub> | <input type="checkbox"/> <sub>7</sub> |
| Religiös-kulturelles Umfeld                       | <input type="checkbox"/> <sub>1</sub> | <input type="checkbox"/> <sub>2</sub> | <input type="checkbox"/> <sub>3</sub> | <input type="checkbox"/> <sub>4</sub> | <input type="checkbox"/> <sub>5</sub> | <input type="checkbox"/> <sub>6</sub> | <input type="checkbox"/> <sub>7</sub> |
| TV                                                | <input type="checkbox"/> <sub>1</sub> | <input type="checkbox"/> <sub>2</sub> | <input type="checkbox"/> <sub>3</sub> | <input type="checkbox"/> <sub>4</sub> | <input type="checkbox"/> <sub>5</sub> | <input type="checkbox"/> <sub>6</sub> | <input type="checkbox"/> <sub>7</sub> |
| Radio                                             | <input type="checkbox"/> <sub>1</sub> | <input type="checkbox"/> <sub>2</sub> | <input type="checkbox"/> <sub>3</sub> | <input type="checkbox"/> <sub>4</sub> | <input type="checkbox"/> <sub>5</sub> | <input type="checkbox"/> <sub>6</sub> | <input type="checkbox"/> <sub>7</sub> |
| Zeitungen und Zeitschriften                       | <input type="checkbox"/> <sub>1</sub> | <input type="checkbox"/> <sub>2</sub> | <input type="checkbox"/> <sub>3</sub> | <input type="checkbox"/> <sub>4</sub> | <input type="checkbox"/> <sub>5</sub> | <input type="checkbox"/> <sub>6</sub> | <input type="checkbox"/> <sub>7</sub> |
| Soziale Netzwerke                                 | <input type="checkbox"/> <sub>1</sub> | <input type="checkbox"/> <sub>2</sub> | <input type="checkbox"/> <sub>3</sub> | <input type="checkbox"/> <sub>4</sub> | <input type="checkbox"/> <sub>5</sub> | <input type="checkbox"/> <sub>6</sub> | <input type="checkbox"/> <sub>7</sub> |
| Erfahrungsberichte im Internet                    | <input type="checkbox"/> <sub>1</sub> | <input type="checkbox"/> <sub>2</sub> | <input type="checkbox"/> <sub>3</sub> | <input type="checkbox"/> <sub>4</sub> | <input type="checkbox"/> <sub>5</sub> | <input type="checkbox"/> <sub>6</sub> | <input type="checkbox"/> <sub>7</sub> |
| Offizielle Seiten im Internet                     | <input type="checkbox"/> <sub>1</sub> | <input type="checkbox"/> <sub>2</sub> | <input type="checkbox"/> <sub>3</sub> | <input type="checkbox"/> <sub>4</sub> | <input type="checkbox"/> <sub>5</sub> | <input type="checkbox"/> <sub>6</sub> | <input type="checkbox"/> <sub>7</sub> |
| Andere Seiten im Internet                         | <input type="checkbox"/> <sub>1</sub> | <input type="checkbox"/> <sub>2</sub> | <input type="checkbox"/> <sub>3</sub> | <input type="checkbox"/> <sub>4</sub> | <input type="checkbox"/> <sub>5</sub> | <input type="checkbox"/> <sub>6</sub> | <input type="checkbox"/> <sub>7</sub> |
| Andere Informationsquelle                         | <input type="checkbox"/> <sub>1</sub> | <input type="checkbox"/> <sub>2</sub> | <input type="checkbox"/> <sub>3</sub> | <input type="checkbox"/> <sub>4</sub> | <input type="checkbox"/> <sub>5</sub> | <input type="checkbox"/> <sub>6</sub> | <input type="checkbox"/> <sub>7</sub> |

## D. Personenbezogene Angaben

### D.1. Geschlecht

<sub>1</sub> männlich    <sub>2</sub> weiblich

### D.2. Geburtsjahr:

\_\_\_\_\_

### D.3. Nationalität

<sub>1</sub> SchweizerIn    <sub>2</sub> andere Nationalität: \_\_\_\_\_    <sub>3</sub> keine Angabe

### D.4. Wie lange wohnen Sie schon an Ihrem jetzigen Wohnort?

<sub>1</sub> bis zu 1 Jahr    <sub>3</sub> mehr als 2 bis 5 Jahre    <sub>5</sub> mehr als 10 bis 15 Jahre    <sub>7</sub> keine Angabe  
<sub>2</sub> mehr als 1 bis 2 Jahre    <sub>4</sub> mehr als 5 bis 10 Jahre    <sub>6</sub> mehr als 15 Jahre

### D.5. Bitte schauen Sie sich die Karte Ihres Quartiers auf der letzten Seite an. In welchem Abschnitt wohnen Sie?

Geben Sie dazu bitte die Koordinaten (Kombination von Buchstaben und Zahl auf der waagerechten bzw. senkrechten Achse) ein.  
 Abschnitt: \_\_\_\_\_

### D.6. Wohnstatus des Haushaltes, in dem Sie leben:

<sub>1</sub> Eigentumswohnung    <sub>3</sub> Mietwohnung    <sub>5</sub> Genossenschaftswohnung    <sub>7</sub> anderes: \_\_\_\_\_  
<sub>2</sub> Eigenes Haus    <sub>4</sub> Haus zur Miete    <sub>6</sub> Altersresidenz/Altersheim    <sub>8</sub> keine Angabe  
 Anzahl Quadratmeter der Wohnung/ des Hauses \_\_\_\_\_

### D.7. Wie viele Personen leben in Ihrem Haushalt / Wohngemeinschaft inklusive Ihnen?

\_\_\_\_\_ Personen

### D.8. Wie viele Kinder leben in Ihrem Haushalt?

|                          | 0                                     | 1                                     | 2                                     | 3                                     | mehr als 3                            |
|--------------------------|---------------------------------------|---------------------------------------|---------------------------------------|---------------------------------------|---------------------------------------|
| Kinder unter 7 Jahre alt | <input type="checkbox"/> <sub>1</sub> | <input type="checkbox"/> <sub>2</sub> | <input type="checkbox"/> <sub>3</sub> | <input type="checkbox"/> <sub>4</sub> | <input type="checkbox"/> <sub>5</sub> |
| Kinder über 7 Jahre alt  | <input type="checkbox"/> <sub>1</sub> | <input type="checkbox"/> <sub>2</sub> | <input type="checkbox"/> <sub>3</sub> | <input type="checkbox"/> <sub>4</sub> | <input type="checkbox"/> <sub>5</sub> |

### D.9. Falls Sie Kinder unter 7 Jahre haben, werden diese auswärtig mit anderen Kindern betreut bzw. versorgt?

<sub>1</sub> nein    <sub>2</sub> ja

### D.10. Wie setzt sich ihr Haushalt zusammen?

<sub>1</sub> Einpersonenhaushalt    <sub>3</sub> (Ehe-)Paar mit Kind    <sub>5</sub> Alleinerziehend mit Kind    <sub>7</sub> keine Angabe  
<sub>2</sub> Wohngemeinschaft    <sub>4</sub> (Ehe-)Paar ohne Kind    <sub>6</sub> Sonstiges: \_\_\_\_\_

### D.11. Wo haben Sie Ihren höchsten Bildungsabschluss erworben?

<sub>1</sub> Obligatorische Schule    <sub>4</sub> Höhere Berufsbildung    <sub>5</sub> Hochschule (ETH, Uni, FH, PH)  
<sub>2</sub> Berufslehre/-ausbildung, Berufsschule    (KV/Handelsschule, höhere    <sub>6</sub> anderer Schulabschluss \_\_\_\_\_  
<sub>3</sub> Gymnasium    Fachschule, Meister, Techniker)    <sub>7</sub> keine Angabe

### D.12. Sind Sie aktuell erwerbstätig? (Mehrfachnennungen möglich)

<sub>1</sub> Vollzeit (mind. 90%)    <sub>3</sub> SchülerIn/Lehrling/StudentIn    <sub>5</sub> RentnerIn    <sub>7</sub> Freiwilligenarbeit  
<sub>2</sub> Teilzeit/Nebenerwerb (<90%)    <sub>4</sub> Hausfrau/Hausmann    <sub>6</sub> zurzeit nicht erwerbstätig    <sub>8</sub> keine Angabe

### D.13. Falls Sie erwerbstätig sind, welches ist Ihre aktuelle berufliche Stellung?

<sub>1</sub> Angestellter mit Führungsfunktion    <sub>2</sub> Angestellter ohne Führungsfunktion    <sub>3</sub> selbstständig

### D.14. Einkommenskategorie (Monatliches Brutto-Haushaltseinkommen)

<sub>1</sub> bis CHF 2000.-    <sub>3</sub> 4001-6000 CHF    <sub>5</sub> 8001-10'000 CHF    <sub>7</sub> > 15'000 CHF  
<sub>2</sub> 2001-4000 CHF    <sub>4</sub> 6001-8000 CHF    <sub>6</sub> 10'001-15'000 CHF    <sub>8</sub> keine Angabe

### D.15. Wo arbeiten Sie? (Ort und Postleitzahl) \_\_\_\_\_

**Karte zu Frage D5**

Bitte schauen Sie sich die Karte Ihres Quartiers an und zeichnen Sie auf der Karte ungefähr ein, wo Sie wohnen. Geben Sie dazu bitte die Koordinate (Kombination von Buchstaben und Zahl auf der waagerechten bzw. senkrechten Achse) an.

**Lesebeispiel (rechts)**

Sie wohnen an der Ecke Bläsiring / Müllheimerstrasse.  
Antwort: N12

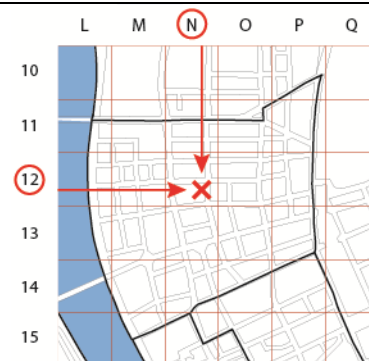

L M N O P Q

10

11

12

13

14

15



N  
↑

200m

**Vielen Dank für Ihre Teilnahme.**

Falls Sie am Gewinnspiel für einen Apple Computer im Wert von CHF 2500.- und zwei Pro Innerstadt-Gutscheinen im Wert von je CHF 500.- teilnehmen möchten, können Sie hier Ihren Namen und Ihre Adresse angeben:

## Questionnaire on Influenza in the City of Basel

Within the scope of the **research project on influenza in the city of Basel**, we are conducting a **survey in selected quarters of Basel**.

The participation in the survey takes approximately 15 minutes and is voluntary. **Your anonymity will be ensured**. We ask you to return this brochure with the completed questionnaire until 1<sup>st</sup> May 2016 with the postage-paid envelope.

Participants can partake in a lottery (**Apple Laptop worth CHF 2500.- and two "Pro Innerstadt"-coupons each worth CHF 500.-**). See end of questionnaire. Many thanks for your participation.

### A. Influenza and common cold

#### A.1. Did you suffer from a strong cold this winter?

- <sub>1</sub> no (if no, please continue with question A6) <sub>2</sub> yes, multiple times <sub>3</sub> yes, once

If **yes**, during which month(s): \_\_\_\_\_

If **yes**, how many days did it considerably impact your day-to-day life? \_\_\_\_\_

#### A.2. Which grievances did you have? (multiple answers possible)

- <sub>1</sub> temperature (over 38 degrees) <sub>3</sub> muscle and rheumatic pains <sub>5</sub> cough <sub>7</sub> sore throat <sub>9</sub> runny nose  
<sub>2</sub> diarrhoea <sub>4</sub> strong fatigue <sub>6</sub> headache <sub>8</sub> strong sense of illness

#### A.3. Has anyone else in your proximity been suffering from the same grievances (influenza/cold) and fallen ill?

- <sub>1</sub> no <sub>2</sub> yes <sub>3</sub> don't know

If **yes**, people (multiple answers possible):

- <sub>1</sub> in the family <sub>2</sub> at work <sub>3</sub> in the neighbourhood <sub>4</sub> in the circle of friends <sub>5</sub> in the "Verein" (club)

#### A.4. Did you contact an expert regarding the cold symptoms?

- <sub>1</sub> no <sub>2</sub> yes

If **yes**, where?

- <sub>1</sub> medical practice <sub>2</sub> hospital <sub>3</sub> pharmacy <sub>4</sub> other, namely: \_\_\_\_\_

#### A.5. Did you take medication to cure of the cold?

- <sub>1</sub> no <sub>2</sub> yes

If **yes**, did you receive Tamiflu?

- <sub>1</sub> yes <sub>2</sub> no

#### A.6. Did you get vaccinated in autumn/winter 2015/16 against Influenza?

- <sub>1</sub> no <sub>2</sub> yes

If **yes**, where: <sub>1</sub> medical practice <sub>2</sub> pharmacy <sub>3</sub> hospital <sub>4</sub> other, namely: \_\_\_\_\_

If **yes**, during which month? \_\_\_\_\_

If **no**: Why did you not get a vaccination? (please mark all relevant points)

- <sub>1</sub> I don't know why I should get vaccinated. <sub>7</sub> Friends/family have had negative experiences with it.  
<sub>2</sub> I wanted to, but then I ended up not doing it. <sub>8</sub> I'm afraid of the side effects.  
<sub>3</sub> I don't believe in the effect of the vaccination. <sub>9</sub> I find needles unpleasant.  
<sub>4</sub> A real flu strengthens my immune system and the protection lasts longer. <sub>10</sub> The vaccination was not recommended to me by experts (doctor/pharmacist).  
<sub>5</sub> It's too expensive for me. <sub>11</sub> other reason, namely: \_\_\_\_\_  
<sub>6</sub> I strengthen my immune system with other means.

If **yes**: Why did you get vaccinated? (please mark all relevant points)

- <sub>1</sub> I don't want to get influenza. <sub>4</sub> The vaccination was recommended to me by family/friends.  
<sub>2</sub> I don't want to be missing at work. <sub>5</sub> The vaccination was recommended to me at work.  
<sub>3</sub> I have friends/family who I want to protect from influenza. <sub>6</sub> The vaccination was recommended to me by experts (doctor/pharmacist).  
<sub>7</sub> other reason, namely: \_\_\_\_\_

**A.7. If you got vaccinated against influenza this year, state your experiences on a scale of 1 (very negative) to 10 (very positive):**

<sub>1</sub> 1   <sub>2</sub> 2   <sub>3</sub> 3   <sub>4</sub> 4   <sub>5</sub> 5   <sub>6</sub> 6   <sub>7</sub> 7   <sub>8</sub> 8   <sub>9</sub> 9   <sub>10</sub> 10  
 very negative very positive

If **positive** experiences, which: \_\_\_\_\_

If **negative** experiences, which: \_\_\_\_\_

**A.8. Do you get vaccinated against influenza on a regular basis?**

<sub>1</sub> no   <sub>2</sub> yes  
 If **yes**, since how many years: \_\_\_\_\_

**A.9. In the past, have you refused other vaccinations which were recommended to you or your children by a doctor?**

<sub>1</sub> no, never   <sub>2</sub> yes, but only certain vaccinations   <sub>3</sub> yes, all vaccinations

**A.10. How do you evaluate your general state of health on a scale from 1 (very negative) to 10 (very positive)?**

<sub>1</sub> 1   <sub>2</sub> 2   <sub>3</sub> 3   <sub>4</sub> 4   <sub>5</sub> 5   <sub>6</sub> 6   <sub>7</sub> 7   <sub>8</sub> 8   <sub>9</sub> 9   <sub>10</sub> 10  
 very negative very positive

**A.11. Do you have a general practitioner?**

<sub>1</sub> no   <sub>2</sub> yes

**A.12. Do you have any chronic diseases due to which you have to take drugs on a daily basis (since at least 6 months)?**

<sub>1</sub> no   <sub>2</sub> yes  
 If **yes**, which drugs: \_\_\_\_\_

**A.13. Do you smoke?**

<sub>1</sub> no   <sub>2</sub> yes, sometimes   <sub>3</sub> yes, daily (number of packets per day): \_\_\_\_\_   <sub>4</sub> not specified

**A.14. Do you drink alcohol?**

<sub>1</sub> no   <sub>2</sub> yes, sometimes   <sub>3</sub> yes, daily   <sub>4</sub> not specified

**A.15. How important do you regard the following measures to prevent influenza?**

|                               | important                             | rather important                      | neutral                               | rather unimportant                    | unimportant                           | don't know                            | no specification                      |
|-------------------------------|---------------------------------------|---------------------------------------|---------------------------------------|---------------------------------------|---------------------------------------|---------------------------------------|---------------------------------------|
| Vaccinating                   | <input type="checkbox"/> <sub>1</sub> | <input type="checkbox"/> <sub>2</sub> | <input type="checkbox"/> <sub>3</sub> | <input type="checkbox"/> <sub>4</sub> | <input type="checkbox"/> <sub>5</sub> | <input type="checkbox"/> <sub>6</sub> | <input type="checkbox"/> <sub>7</sub> |
| Washing hands                 | <input type="checkbox"/> <sub>1</sub> | <input type="checkbox"/> <sub>2</sub> | <input type="checkbox"/> <sub>3</sub> | <input type="checkbox"/> <sub>4</sub> | <input type="checkbox"/> <sub>5</sub> | <input type="checkbox"/> <sub>6</sub> | <input type="checkbox"/> <sub>7</sub> |
| Health check-up at the doctor | <input type="checkbox"/> <sub>1</sub> | <input type="checkbox"/> <sub>2</sub> | <input type="checkbox"/> <sub>3</sub> | <input type="checkbox"/> <sub>4</sub> | <input type="checkbox"/> <sub>5</sub> | <input type="checkbox"/> <sub>6</sub> | <input type="checkbox"/> <sub>7</sub> |
| Healthy diet                  | <input type="checkbox"/> <sub>1</sub> | <input type="checkbox"/> <sub>2</sub> | <input type="checkbox"/> <sub>3</sub> | <input type="checkbox"/> <sub>4</sub> | <input type="checkbox"/> <sub>5</sub> | <input type="checkbox"/> <sub>6</sub> | <input type="checkbox"/> <sub>7</sub> |
| Regular physical activity     | <input type="checkbox"/> <sub>1</sub> | <input type="checkbox"/> <sub>2</sub> | <input type="checkbox"/> <sub>3</sub> | <input type="checkbox"/> <sub>4</sub> | <input type="checkbox"/> <sub>5</sub> | <input type="checkbox"/> <sub>6</sub> | <input type="checkbox"/> <sub>7</sub> |
| Other                         | <input type="checkbox"/> <sub>1</sub> | <input type="checkbox"/> <sub>2</sub> | <input type="checkbox"/> <sub>3</sub> | <input type="checkbox"/> <sub>4</sub> | <input type="checkbox"/> <sub>5</sub> | <input type="checkbox"/> <sub>6</sub> | <input type="checkbox"/> <sub>7</sub> |

other, namely: \_\_\_\_\_

**A.16. How good do you implement the following measures into your day-to-day life?**

|                               | very good                             | good                                  | average                               | bad                                   | very bad                              | don't know                            | no specification                      |
|-------------------------------|---------------------------------------|---------------------------------------|---------------------------------------|---------------------------------------|---------------------------------------|---------------------------------------|---------------------------------------|
| Vaccinating                   | <input type="checkbox"/> <sub>1</sub> | <input type="checkbox"/> <sub>2</sub> | <input type="checkbox"/> <sub>3</sub> | <input type="checkbox"/> <sub>4</sub> | <input type="checkbox"/> <sub>5</sub> | <input type="checkbox"/> <sub>6</sub> | <input type="checkbox"/> <sub>7</sub> |
| Washing hands                 | <input type="checkbox"/> <sub>1</sub> | <input type="checkbox"/> <sub>2</sub> | <input type="checkbox"/> <sub>3</sub> | <input type="checkbox"/> <sub>4</sub> | <input type="checkbox"/> <sub>5</sub> | <input type="checkbox"/> <sub>6</sub> | <input type="checkbox"/> <sub>7</sub> |
| Health check-up at the doctor | <input type="checkbox"/> <sub>1</sub> | <input type="checkbox"/> <sub>2</sub> | <input type="checkbox"/> <sub>3</sub> | <input type="checkbox"/> <sub>4</sub> | <input type="checkbox"/> <sub>5</sub> | <input type="checkbox"/> <sub>6</sub> | <input type="checkbox"/> <sub>7</sub> |
| Healthy diet                  | <input type="checkbox"/> <sub>1</sub> | <input type="checkbox"/> <sub>2</sub> | <input type="checkbox"/> <sub>3</sub> | <input type="checkbox"/> <sub>4</sub> | <input type="checkbox"/> <sub>5</sub> | <input type="checkbox"/> <sub>6</sub> | <input type="checkbox"/> <sub>7</sub> |
| Regular physical activity     | <input type="checkbox"/> <sub>1</sub> | <input type="checkbox"/> <sub>2</sub> | <input type="checkbox"/> <sub>3</sub> | <input type="checkbox"/> <sub>4</sub> | <input type="checkbox"/> <sub>5</sub> | <input type="checkbox"/> <sub>6</sub> | <input type="checkbox"/> <sub>7</sub> |
| Other                         | <input type="checkbox"/> <sub>1</sub> | <input type="checkbox"/> <sub>2</sub> | <input type="checkbox"/> <sub>3</sub> | <input type="checkbox"/> <sub>4</sub> | <input type="checkbox"/> <sub>5</sub> | <input type="checkbox"/> <sub>6</sub> | <input type="checkbox"/> <sub>7</sub> |

## B. Aspects of city environment

### B.1. How often do you use the following means of transport?

|                                     | daily                      | several times per week     | several times per month    | rarely                     | never                      | don't know                 | no specification           |
|-------------------------------------|----------------------------|----------------------------|----------------------------|----------------------------|----------------------------|----------------------------|----------------------------|
| Car, motor cycle, motor scooter     | <input type="checkbox"/> 1 | <input type="checkbox"/> 2 | <input type="checkbox"/> 3 | <input type="checkbox"/> 4 | <input type="checkbox"/> 5 | <input type="checkbox"/> 6 | <input type="checkbox"/> 7 |
| Public transport (bus, tram, train) | <input type="checkbox"/> 1 | <input type="checkbox"/> 2 | <input type="checkbox"/> 3 | <input type="checkbox"/> 4 | <input type="checkbox"/> 5 | <input type="checkbox"/> 6 | <input type="checkbox"/> 7 |
| Bike                                | <input type="checkbox"/> 1 | <input type="checkbox"/> 2 | <input type="checkbox"/> 3 | <input type="checkbox"/> 4 | <input type="checkbox"/> 5 | <input type="checkbox"/> 6 | <input type="checkbox"/> 7 |
| On foot                             | <input type="checkbox"/> 1 | <input type="checkbox"/> 2 | <input type="checkbox"/> 3 | <input type="checkbox"/> 4 | <input type="checkbox"/> 5 | <input type="checkbox"/> 6 | <input type="checkbox"/> 7 |
| Other                               | <input type="checkbox"/> 1 | <input type="checkbox"/> 2 | <input type="checkbox"/> 3 | <input type="checkbox"/> 4 | <input type="checkbox"/> 5 | <input type="checkbox"/> 6 | <input type="checkbox"/> 7 |

other, namely: \_\_\_\_\_

### B.2. How often do you undertake in the following activities?

|                                               | daily                      | several times per week     | several times per month    | rarely                     | never                      | don't know                 | no specification           |
|-----------------------------------------------|----------------------------|----------------------------|----------------------------|----------------------------|----------------------------|----------------------------|----------------------------|
| Shopping in supermarkets (Coop, Migros, etc.) | <input type="checkbox"/> 1 | <input type="checkbox"/> 2 | <input type="checkbox"/> 3 | <input type="checkbox"/> 4 | <input type="checkbox"/> 5 | <input type="checkbox"/> 6 | <input type="checkbox"/> 7 |
| Cinema                                        | <input type="checkbox"/> 1 | <input type="checkbox"/> 2 | <input type="checkbox"/> 3 | <input type="checkbox"/> 4 | <input type="checkbox"/> 5 | <input type="checkbox"/> 6 | <input type="checkbox"/> 7 |
| Restaurant/ café/ bar                         | <input type="checkbox"/> 1 | <input type="checkbox"/> 2 | <input type="checkbox"/> 3 | <input type="checkbox"/> 4 | <input type="checkbox"/> 5 | <input type="checkbox"/> 6 | <input type="checkbox"/> 7 |
| Cultural events                               | <input type="checkbox"/> 1 | <input type="checkbox"/> 2 | <input type="checkbox"/> 3 | <input type="checkbox"/> 4 | <input type="checkbox"/> 5 | <input type="checkbox"/> 6 | <input type="checkbox"/> 7 |
| Sporting events / games                       | <input type="checkbox"/> 1 | <input type="checkbox"/> 2 | <input type="checkbox"/> 3 | <input type="checkbox"/> 4 | <input type="checkbox"/> 5 | <input type="checkbox"/> 6 | <input type="checkbox"/> 7 |

### B.3. Approximately, with how many people do you have contact on a regular work day (work environment, family, friends, clubs)?

1 0-10      2 10-50      3 50-100      4 more than 100

### B.4. If you are working, do you have contact with other people?

1 no      2 yes      3 no specification

### B.5. Do you work in the health sector with contact to patients (medical personnel or nurse)?

1 no      2 yes      3 no specification

### B.6. Do you work with children (kindergarten, play group, day care, school etc.)?

1 no      2 yes      3 no specification

### B.7. Is your workplace in an open-plan office or in a room with many people?

1 no      2 yes      3 no specification

### B.8. Do you feel exposed to damaging environmental influences in your living environment? (e.g. emissions, fine dust, electric smog, noise etc.)

1 no      2 yes      3 no specification

If yes, which: \_\_\_\_\_

### B.9. Have you visited people in hospital or an old people's home this autumn/winter 2015/16?

1 no      2 yes

If yes, how often:

1 1-4 times      2 more than 5 times      3 I regularly visit people in healthcare facilities.

### B.10. Do you regularly look after care-dependent family members at home?

1 no      2 yes

### B.11. Do you live with people who suffer from a chronic disease?

1 no      2 yes

## C. Procurement of Information on Health Questions

### C.1. From where do you procure your information on health questions? (multiple answers possible)

- <sub>1</sub> doctor  
<sub>2</sub> pharmacy  
<sub>3</sub> social circle (friends, acquaintances, family etc.)  
<sub>4</sub> religio-cultural context  
<sub>5</sub> other source of information,  
 namely: \_\_\_\_\_  
<sub>6</sub> TV  
<sub>7</sub> radio  
<sub>8</sub> newspaper and magazines  
<sub>9</sub> social networks  
<sub>10</sub> internet, namely:  
<sub>11</sub> from experience reports of other people  
<sub>12</sub> from official websites (Federal Office of Public Health, hospital)  
<sub>13</sub> from other sites: \_\_\_\_\_  
<sub>14</sub> I don't inform myself.

### C.2. How helpful do you find the information offered?

|                                                     | very helpful                          | helpful                               | average                               | less helpful                          | not at all helpful                    | don't know                            | no specification                      |
|-----------------------------------------------------|---------------------------------------|---------------------------------------|---------------------------------------|---------------------------------------|---------------------------------------|---------------------------------------|---------------------------------------|
| Doctor                                              | <input type="checkbox"/> <sub>1</sub> | <input type="checkbox"/> <sub>2</sub> | <input type="checkbox"/> <sub>3</sub> | <input type="checkbox"/> <sub>4</sub> | <input type="checkbox"/> <sub>5</sub> | <input type="checkbox"/> <sub>6</sub> | <input type="checkbox"/> <sub>7</sub> |
| Pharmacy                                            | <input type="checkbox"/> <sub>1</sub> | <input type="checkbox"/> <sub>2</sub> | <input type="checkbox"/> <sub>3</sub> | <input type="checkbox"/> <sub>4</sub> | <input type="checkbox"/> <sub>5</sub> | <input type="checkbox"/> <sub>6</sub> | <input type="checkbox"/> <sub>7</sub> |
| Social circle (friends, acquaintances, family etc.) | <input type="checkbox"/> <sub>1</sub> | <input type="checkbox"/> <sub>2</sub> | <input type="checkbox"/> <sub>3</sub> | <input type="checkbox"/> <sub>4</sub> | <input type="checkbox"/> <sub>5</sub> | <input type="checkbox"/> <sub>6</sub> | <input type="checkbox"/> <sub>7</sub> |
| Religio-cultural context                            | <input type="checkbox"/> <sub>1</sub> | <input type="checkbox"/> <sub>2</sub> | <input type="checkbox"/> <sub>3</sub> | <input type="checkbox"/> <sub>4</sub> | <input type="checkbox"/> <sub>5</sub> | <input type="checkbox"/> <sub>6</sub> | <input type="checkbox"/> <sub>7</sub> |
| TV                                                  | <input type="checkbox"/> <sub>1</sub> | <input type="checkbox"/> <sub>2</sub> | <input type="checkbox"/> <sub>3</sub> | <input type="checkbox"/> <sub>4</sub> | <input type="checkbox"/> <sub>5</sub> | <input type="checkbox"/> <sub>6</sub> | <input type="checkbox"/> <sub>7</sub> |
| Radio                                               | <input type="checkbox"/> <sub>1</sub> | <input type="checkbox"/> <sub>2</sub> | <input type="checkbox"/> <sub>3</sub> | <input type="checkbox"/> <sub>4</sub> | <input type="checkbox"/> <sub>5</sub> | <input type="checkbox"/> <sub>6</sub> | <input type="checkbox"/> <sub>7</sub> |
| Newspaper and magazines                             | <input type="checkbox"/> <sub>1</sub> | <input type="checkbox"/> <sub>2</sub> | <input type="checkbox"/> <sub>3</sub> | <input type="checkbox"/> <sub>4</sub> | <input type="checkbox"/> <sub>5</sub> | <input type="checkbox"/> <sub>6</sub> | <input type="checkbox"/> <sub>7</sub> |
| Social networks                                     | <input type="checkbox"/> <sub>1</sub> | <input type="checkbox"/> <sub>2</sub> | <input type="checkbox"/> <sub>3</sub> | <input type="checkbox"/> <sub>4</sub> | <input type="checkbox"/> <sub>5</sub> | <input type="checkbox"/> <sub>6</sub> | <input type="checkbox"/> <sub>7</sub> |
| Experience reports of other people on the internet  | <input type="checkbox"/> <sub>1</sub> | <input type="checkbox"/> <sub>2</sub> | <input type="checkbox"/> <sub>3</sub> | <input type="checkbox"/> <sub>4</sub> | <input type="checkbox"/> <sub>5</sub> | <input type="checkbox"/> <sub>6</sub> | <input type="checkbox"/> <sub>7</sub> |
| Official websites on the internet                   | <input type="checkbox"/> <sub>1</sub> | <input type="checkbox"/> <sub>2</sub> | <input type="checkbox"/> <sub>3</sub> | <input type="checkbox"/> <sub>4</sub> | <input type="checkbox"/> <sub>5</sub> | <input type="checkbox"/> <sub>6</sub> | <input type="checkbox"/> <sub>7</sub> |
| Other websites on the internet                      | <input type="checkbox"/> <sub>1</sub> | <input type="checkbox"/> <sub>2</sub> | <input type="checkbox"/> <sub>3</sub> | <input type="checkbox"/> <sub>4</sub> | <input type="checkbox"/> <sub>5</sub> | <input type="checkbox"/> <sub>6</sub> | <input type="checkbox"/> <sub>7</sub> |
| Other sources of information                        | <input type="checkbox"/> <sub>1</sub> | <input type="checkbox"/> <sub>2</sub> | <input type="checkbox"/> <sub>3</sub> | <input type="checkbox"/> <sub>4</sub> | <input type="checkbox"/> <sub>5</sub> | <input type="checkbox"/> <sub>6</sub> | <input type="checkbox"/> <sub>7</sub> |



## D. Personal Data

### D.1. Gender

- <sub>1</sub> male <sub>2</sub> female

### D.2. Year of birth:

\_\_\_\_\_

### D.3. Nationality

- <sub>1</sub> Swiss <sub>2</sub> other nationality: \_\_\_\_\_ <sub>3</sub> no specification

### D.4. How long have you been living at your current location?

- <sub>1</sub> up to 1 year <sub>2</sub> more than 1 to 2 years <sub>3</sub> more than 2 to 5 years <sub>4</sub> more than 5 to 10 years <sub>5</sub> more than 10 to 15 years <sub>6</sub> more than 15 years <sub>7</sub> no specification

### D.5. Please look at the map of your quarter on the last page. In which segment do you live? Please state the coordinates (a combination of a letter and a number on the horizontal respectively vertical axis).

Segment: \_\_\_\_\_

### D.6. Residential status of the household you are living in:

- <sub>1</sub> owner-occupied flat <sub>2</sub> owner-occupied house <sub>3</sub> rental apartment <sub>4</sub> rental house <sub>5</sub> co-operative flat <sub>6</sub> old people's home <sub>7</sub> other: \_\_\_\_\_ <sub>8</sub> no specification

Number of square metres of the apartment/house: \_\_\_\_\_

### D.7. How many people live in your household / flat share including yourself?

\_\_\_\_\_ people

### D.8. How many children live in your household?

|                            | 0                                     | 1                                     | 2                                     | 3                                     | More than 3                           |
|----------------------------|---------------------------------------|---------------------------------------|---------------------------------------|---------------------------------------|---------------------------------------|
| Children under 7 years old | <input type="checkbox"/> <sub>1</sub> | <input type="checkbox"/> <sub>2</sub> | <input type="checkbox"/> <sub>3</sub> | <input type="checkbox"/> <sub>4</sub> | <input type="checkbox"/> <sub>5</sub> |
| Children over 7 years old  | <input type="checkbox"/> <sub>1</sub> | <input type="checkbox"/> <sub>2</sub> | <input type="checkbox"/> <sub>3</sub> | <input type="checkbox"/> <sub>4</sub> | <input type="checkbox"/> <sub>5</sub> |

### D.9. If you have children under 7 years old, are they being looked after externally together with other children?

- <sub>1</sub> no <sub>2</sub> yes

### D.10. What is the structure of your household?

- <sub>1</sub> one-person household <sub>2</sub> flat share <sub>3</sub> (married) couple with child <sub>4</sub> (married) couple without child <sub>5</sub> single parent with child <sub>6</sub> other: \_\_\_\_\_ <sub>7</sub> no specification

### D.11. Where have you attained your educational qualification?

- <sub>1</sub> compulsory school <sub>2</sub> vocational education / -training, trade school <sub>3</sub> gymnasium <sub>4</sub> higher vocational education (commercial college, higher professional school, foreman, technician) <sub>5</sub> institution of higher education (ETH, university, college, teacher training college) <sub>6</sub> other school qualification \_\_\_\_\_ <sub>7</sub> no specification

### D.12. Are you currently employed? (multiple answers possible)

- <sub>1</sub> full-time (min. 90%) <sub>2</sub> part-time/side job (<90%) <sub>3</sub> pupil/apprentice/student <sub>4</sub> housewife/househusband <sub>5</sub> pensioner <sub>6</sub> currently not employed <sub>7</sub> voluntary work <sub>8</sub> no specification

### D.13. If you are employed, what position do you hold?

- <sub>1</sub> employee with management function <sub>2</sub> employee without management function <sub>3</sub> self-employed

### D.14. Category of income (monthly gross household income)

- <sub>1</sub> up to CHF 2000 <sub>2</sub> 2001-4000 CHF <sub>3</sub> 4001-6000 CHF <sub>4</sub> 6001-8000 CHF <sub>5</sub> 8001-10'000 CHF <sub>6</sub> 10'001-15'000 CHF <sub>7</sub> > 15'000 CHF <sub>8</sub> no specification

### D.15. Where do you work? (place and postcode): \_\_\_\_\_

**Map for question D5**

Please look at the map of your quarter and mark the approximate location of your residence. Please state the coordinates (a combination of a letter and a number on the horizontal respectively vertical axis).

**Example (right)**

You live at the corner of Bläsiring / Müllheimerstrasse.

Answer: N12

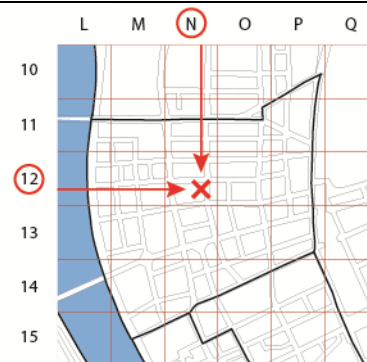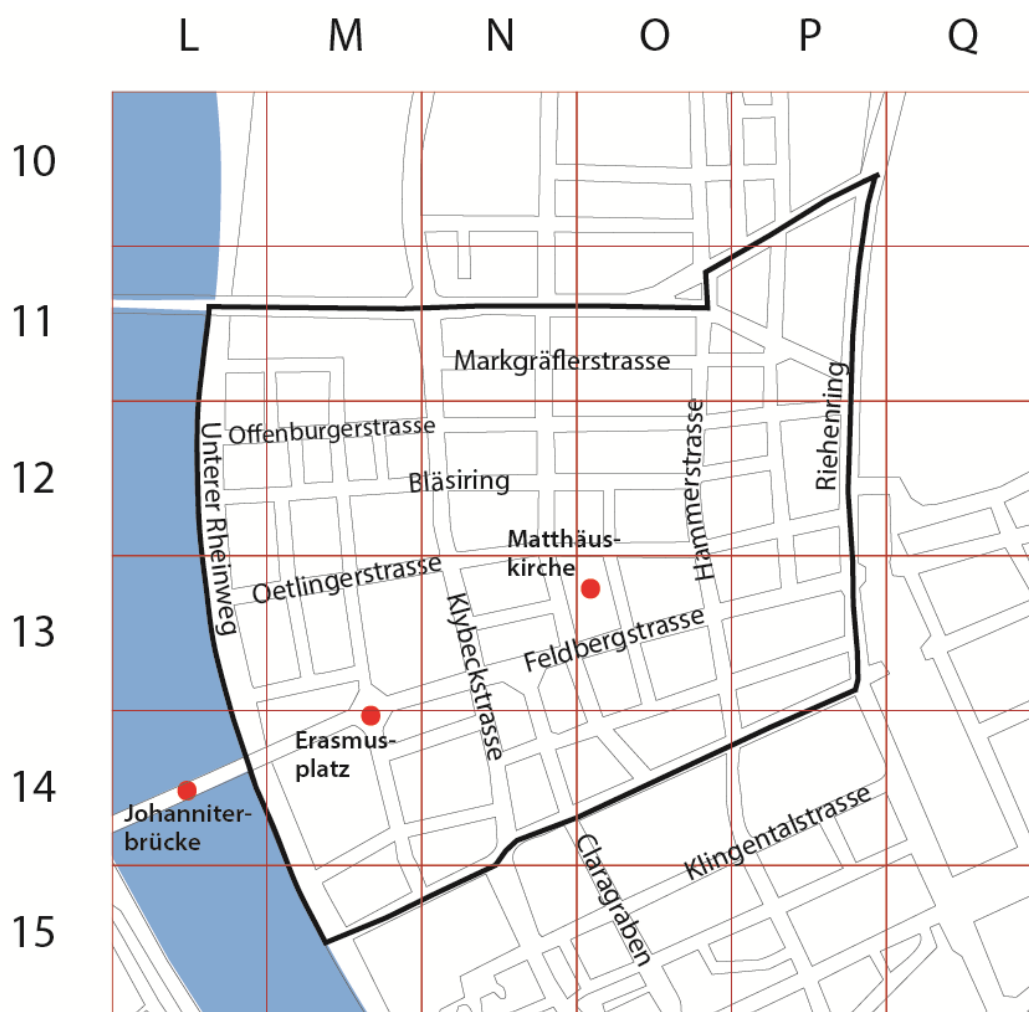

**Thank you for your participation.**

If you would like to participate in the lottery for an Apple computer worth CHF 2500.- and two "Pro Innerstadt"-coupons each worth CHF 500.-, you can leave your name and address here:
