# Supplementary material for: Identification of influenza urban transmission patterns by geographical, epidemiological and whole genome sequencing data: protocol for an observational study
Source: PubMed Central journal article supplement — BMJ Open. 2019 Aug 20;9(8):e030913. doi: 10.1136/bmjopen-2019-030913 (PMC6707652; doi:10.1136/bmjopen-2019-030913), 2019-08-20
Supplement: bmjopen-2019-030913supp001.pdf [file bmjopen-2019-030913supp001.pdf]

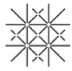

Universität  
Basel

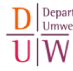

Departement  
Umweltwissenschaften  
Humangeographie  
Stadt- und Regionalforschung

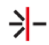

Universitätsspital  
Basel

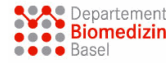

Departement  
Biomedizin  
Basel

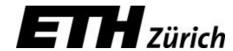

## Befragung zu Grippeerkrankungen in der Stadt Basel

Im Rahmen eines Forschungsprojekts zu Grippeerkrankungen in der Stadt Basel führen wir eine Befragung in ausgewählten Basler Quartieren durch.

Die Teilnahme an der Umfrage dauert circa 15 Minuten und ist freiwillig. Ihre Anonymität wird gewährleistet. Wir bitten Sie, diese Broschüre mit Ihrem ausgefüllten Fragebogen bis zum 1. Mai 2016 mit dem vorfrankierten Rückumschlag zurückzusenden.

Teilnehmende Personen können an einem Gewinnspiel teilnehmen (Apple Laptop im Wert von CHF 2500.- und zwei Pro Innerstadt-Gutscheine im Wert von je CHF 500.-). Siehe Ende des Fragebogens. Vielen Dank für Ihre Mitwirkung.

### A. Grippe und Erkältung

#### A.1. Waren Sie in diesem Winter oder Frühling stark erkältet?

- <sub>1</sub> nein (falls nein, bitte weiter mit Frage A6)    <sub>2</sub> ja, mehrfach    <sub>3</sub> ja, einmal  
Falls ja, in welchem/n Monat(en): \_\_\_\_\_  
Falls ja, wie viele Tage waren Sie dadurch im Alltag deutlich eingeschränkt? \_\_\_\_\_

#### A.2. Welche Beschwerden hatten Sie? (Mehrfachnennungen möglich)

- <sub>1</sub> Fieber (über 38 Grad)    <sub>3</sub> Muskel- und Gliederschmerzen    <sub>5</sub> Husten    <sub>7</sub> Halsschmerzen    <sub>9</sub> laufende Nase  
<sub>2</sub> Durchfall    <sub>4</sub> starke Müdigkeit    <sub>6</sub> Kopfschmerzen    <sub>8</sub> starkes Krankheitsgefühl

#### A.3. Ist sonst noch jemand mit den gleichen Beschwerden (Grippe/Erkältung) in Ihrem näheren Umfeld krank gewesen?

- <sub>1</sub> nein    <sub>2</sub> ja    <sub>3</sub> weiss nicht  
Falls ja, Personen (Mehrfachnennungen möglich):  
<sub>1</sub> in der Familie    <sub>2</sub> bei der Arbeit    <sub>3</sub> in der Nachbarschaft    <sub>4</sub> im Freundeskreis    <sub>5</sub> im Verein

#### A.4. Haben Sie wegen der Erkältungs-Beschwerden eine Fachperson aufgesucht?

- <sub>1</sub> nein    <sub>2</sub> ja  
Falls ja, wo?  
<sub>1</sub> Arztpraxis    <sub>2</sub> Spital    <sub>3</sub> Apotheke    <sub>4</sub> andere, und zwar: \_\_\_\_\_

#### A.5. Haben Sie zur Behandlung der Erkältung Medikamente eingenommen?

- <sub>1</sub> nein    <sub>2</sub> ja  
Falls ja, haben Sie Tamiflu erhalten?  
<sub>1</sub> ja    <sub>2</sub> nein

#### A.6. Haben Sie sich im Herbst/Winter 2015/16 gegen Grippe impfen lassen?

- <sub>1</sub> nein    <sub>2</sub> ja  
Falls ja, wo:    <sub>1</sub> Arztpraxis    <sub>2</sub> Apotheke    <sub>3</sub> Spital    <sub>4</sub> woanders, und zwar: \_\_\_\_\_  
Falls ja, in welchem Monat? \_\_\_\_\_

Falls nein: Warum haben Sie sich nicht geimpft? (Bitte kreuzen Sie alle relevanten Punkte an)

- <sub>1</sub> Ich weiss nicht, warum ich mich impfen lassen sollte.    <sub>7</sub> Freunde/Angehörige haben schlechte Erfahrungen damit gemacht.  
<sub>2</sub> Ich wollte eigentlich, aber habe es dann doch nicht getan.    <sub>8</sub> Ich scheue mich vor den Nebenwirkungen.  
<sub>3</sub> Ich glaube nicht an die Wirkung der Impfung.    <sub>9</sub> Spritzen sind mir unangenehm.  
<sub>4</sub> Eine richtige Grippe stärkt mein Immunsystem mehr und der Schutz hält länger.    <sub>10</sub> Die Impfung wurde mir von Fachpersonen (Arzt/Apotheker) nicht empfohlen.  
<sub>5</sub> Das ist mir zu teuer.    <sub>11</sub> Anderer Grund, und zwar: \_\_\_\_\_  
<sub>6</sub> Ich stärkte meine Abwehr mit anderen Mitteln.

Falls ja: Warum haben Sie sich geimpft? (Bitte kreuzen Sie alle relevanten Punkte an)

- <sub>1</sub> Ich möchte keine Grippe bekommen.    <sub>4</sub> Die Impfung wurde mir von Angehörigen/Freunden empfohlen.  
<sub>2</sub> Ich möchte nicht bei der Arbeit fehlen.    <sub>5</sub> Die Impfung wurde mir am Arbeitsplatz empfohlen.  
<sub>3</sub> Ich habe Freunde/Angehörige, die ich vor der Grippe schützen möchte.    <sub>6</sub> Die Impfung wurde mir von Fachpersonen (Arzt/Apotheker) empfohlen.  
<sub>7</sub> Anderer Grund, und zwar: \_\_\_\_\_

**A.7. Falls Sie sich dieses Jahr gegen Grippe geimpft haben, geben Sie Ihre Erfahrungen auf einer Skala von 1 (sehr negativ) bis 10 (sehr positiv) an:**

<sub>1</sub> 1    <sub>2</sub> 2    <sub>3</sub> 3    <sub>4</sub> 4    <sub>5</sub> 5    <sub>6</sub> 6    <sub>7</sub> 7    <sub>8</sub> 8    <sub>9</sub> 9    <sub>10</sub> 10  
 sehr negativ sehr positiv

Falls **positive** Erfahrungen, welche: \_\_\_\_\_

Falls **negative** Erfahrungen, welche: \_\_\_\_\_

**A.8. Lassen Sie sich regelmässig gegen Grippe impfen?**

<sub>1</sub> nein    <sub>2</sub> ja  
 Falls **ja**, seit wie vielen Jahren: \_\_\_\_\_

**A.9. Haben Sie in der Vergangenheit andere vom Arzt empfohlene Impfungen für sich selbst oder für Ihre Kinder abgelehnt?**

<sub>1</sub> nein, nie    <sub>2</sub> ja, aber nur gewisse Impfungen    <sub>3</sub> ja, alle Impfungen

**A.10. Wie schätzen Sie Ihren allgemeinen Gesundheitszustand auf einer Skala von 1 (sehr negativ) bis 10 (sehr positiv) ein?**

<sub>1</sub> 1    <sub>2</sub> 2    <sub>3</sub> 3    <sub>4</sub> 4    <sub>5</sub> 5    <sub>6</sub> 6    <sub>7</sub> 7    <sub>8</sub> 8    <sub>9</sub> 9    <sub>10</sub> 10  
 sehr negativ sehr positiv

**A.11. Haben Sie eine Hausärztin oder einen Hausarzt?**

<sub>1</sub> nein    <sub>2</sub> ja

**A.12. Haben Sie chronische Krankheiten, wegen denen Sie täglich Medikamente einnehmen müssen (mindestens seit 6 Monaten)?**

<sub>1</sub> nein    <sub>2</sub> ja  
 Falls **ja**, welche Medikamente: \_\_\_\_\_

**A.13. Rauchen Sie?**

<sub>1</sub> nein    <sub>2</sub> ja, gelegentlich    <sub>3</sub> ja, täglich (Anzahl Päckchen pro Tag) \_\_\_\_\_    <sub>4</sub> keine Angabe

**A.14. Trinken Sie Alkohol?**

<sub>1</sub> nein    <sub>2</sub> ja, gelegentlich    <sub>3</sub> ja, täglich    <sub>4</sub> keine Angabe

**A.15. Für wie wichtig halten Sie folgende Massnahmen um einer Grippe vorzubeugen?**

|                                    | wichtig                               | eher wichtig                          | neutral                               | eher unwichtig                        | unwichtig                             | weiss nicht                           | keine Angabe                          |
|------------------------------------|---------------------------------------|---------------------------------------|---------------------------------------|---------------------------------------|---------------------------------------|---------------------------------------|---------------------------------------|
| Impfen                             | <input type="checkbox"/> <sub>1</sub> | <input type="checkbox"/> <sub>2</sub> | <input type="checkbox"/> <sub>3</sub> | <input type="checkbox"/> <sub>4</sub> | <input type="checkbox"/> <sub>5</sub> | <input type="checkbox"/> <sub>6</sub> | <input type="checkbox"/> <sub>7</sub> |
| Händewaschen                       | <input type="checkbox"/> <sub>1</sub> | <input type="checkbox"/> <sub>2</sub> | <input type="checkbox"/> <sub>3</sub> | <input type="checkbox"/> <sub>4</sub> | <input type="checkbox"/> <sub>5</sub> | <input type="checkbox"/> <sub>6</sub> | <input type="checkbox"/> <sub>7</sub> |
| Gesundheits-Checkup beim Arzt      | <input type="checkbox"/> <sub>1</sub> | <input type="checkbox"/> <sub>2</sub> | <input type="checkbox"/> <sub>3</sub> | <input type="checkbox"/> <sub>4</sub> | <input type="checkbox"/> <sub>5</sub> | <input type="checkbox"/> <sub>6</sub> | <input type="checkbox"/> <sub>7</sub> |
| Gesunde Ernährung                  | <input type="checkbox"/> <sub>1</sub> | <input type="checkbox"/> <sub>2</sub> | <input type="checkbox"/> <sub>3</sub> | <input type="checkbox"/> <sub>4</sub> | <input type="checkbox"/> <sub>5</sub> | <input type="checkbox"/> <sub>6</sub> | <input type="checkbox"/> <sub>7</sub> |
| Regelmässige körperliche Aktivität | <input type="checkbox"/> <sub>1</sub> | <input type="checkbox"/> <sub>2</sub> | <input type="checkbox"/> <sub>3</sub> | <input type="checkbox"/> <sub>4</sub> | <input type="checkbox"/> <sub>5</sub> | <input type="checkbox"/> <sub>6</sub> | <input type="checkbox"/> <sub>7</sub> |
| Sonstige                           | <input type="checkbox"/> <sub>1</sub> | <input type="checkbox"/> <sub>2</sub> | <input type="checkbox"/> <sub>3</sub> | <input type="checkbox"/> <sub>4</sub> | <input type="checkbox"/> <sub>5</sub> | <input type="checkbox"/> <sub>6</sub> | <input type="checkbox"/> <sub>7</sub> |

sonstige, und zwar: \_\_\_\_\_

**A.16. Wie gut setzen Sie folgende Massnahmen Ihrer Meinung nach im Alltag um?**

|                                    | sehr gut                              | gut                                   | mittelmässig                          | schlecht                              | sehr schlecht                         | weiss nicht                           | keine Angabe                          |
|------------------------------------|---------------------------------------|---------------------------------------|---------------------------------------|---------------------------------------|---------------------------------------|---------------------------------------|---------------------------------------|
| Impfen                             | <input type="checkbox"/> <sub>1</sub> | <input type="checkbox"/> <sub>2</sub> | <input type="checkbox"/> <sub>3</sub> | <input type="checkbox"/> <sub>4</sub> | <input type="checkbox"/> <sub>5</sub> | <input type="checkbox"/> <sub>6</sub> | <input type="checkbox"/> <sub>7</sub> |
| Händewaschen                       | <input type="checkbox"/> <sub>1</sub> | <input type="checkbox"/> <sub>2</sub> | <input type="checkbox"/> <sub>3</sub> | <input type="checkbox"/> <sub>4</sub> | <input type="checkbox"/> <sub>5</sub> | <input type="checkbox"/> <sub>6</sub> | <input type="checkbox"/> <sub>7</sub> |
| Gesundheits-Checkup beim Arzt      | <input type="checkbox"/> <sub>1</sub> | <input type="checkbox"/> <sub>2</sub> | <input type="checkbox"/> <sub>3</sub> | <input type="checkbox"/> <sub>4</sub> | <input type="checkbox"/> <sub>5</sub> | <input type="checkbox"/> <sub>6</sub> | <input type="checkbox"/> <sub>7</sub> |
| Gesunde Ernährung                  | <input type="checkbox"/> <sub>1</sub> | <input type="checkbox"/> <sub>2</sub> | <input type="checkbox"/> <sub>3</sub> | <input type="checkbox"/> <sub>4</sub> | <input type="checkbox"/> <sub>5</sub> | <input type="checkbox"/> <sub>6</sub> | <input type="checkbox"/> <sub>7</sub> |
| Regelmässige körperliche Aktivität | <input type="checkbox"/> <sub>1</sub> | <input type="checkbox"/> <sub>2</sub> | <input type="checkbox"/> <sub>3</sub> | <input type="checkbox"/> <sub>4</sub> | <input type="checkbox"/> <sub>5</sub> | <input type="checkbox"/> <sub>6</sub> | <input type="checkbox"/> <sub>7</sub> |
| Sonstige                           | <input type="checkbox"/> <sub>1</sub> | <input type="checkbox"/> <sub>2</sub> | <input type="checkbox"/> <sub>3</sub> | <input type="checkbox"/> <sub>4</sub> | <input type="checkbox"/> <sub>5</sub> | <input type="checkbox"/> <sub>6</sub> | <input type="checkbox"/> <sub>7</sub> |

## B. Aspekte der städtischen Umwelt

### B.1. Wie oft benutzen Sie die folgenden Verkehrsmittel?

|                                              | täglich                               | mehrmals die Woche                    | mehrmals im Monat                     | seltener                              | nie                                   | weiss nicht                           | keine Angabe                          |
|----------------------------------------------|---------------------------------------|---------------------------------------|---------------------------------------|---------------------------------------|---------------------------------------|---------------------------------------|---------------------------------------|
| Auto, Motorrad, Roller                       | <input type="checkbox"/> <sub>1</sub> | <input type="checkbox"/> <sub>2</sub> | <input type="checkbox"/> <sub>3</sub> | <input type="checkbox"/> <sub>4</sub> | <input type="checkbox"/> <sub>5</sub> | <input type="checkbox"/> <sub>6</sub> | <input type="checkbox"/> <sub>7</sub> |
| Öffentliche Verkehrsmittel (Bus, Tram, Bahn) | <input type="checkbox"/> <sub>1</sub> | <input type="checkbox"/> <sub>2</sub> | <input type="checkbox"/> <sub>3</sub> | <input type="checkbox"/> <sub>4</sub> | <input type="checkbox"/> <sub>5</sub> | <input type="checkbox"/> <sub>6</sub> | <input type="checkbox"/> <sub>7</sub> |
| Fahrrad                                      | <input type="checkbox"/> <sub>1</sub> | <input type="checkbox"/> <sub>2</sub> | <input type="checkbox"/> <sub>3</sub> | <input type="checkbox"/> <sub>4</sub> | <input type="checkbox"/> <sub>5</sub> | <input type="checkbox"/> <sub>6</sub> | <input type="checkbox"/> <sub>7</sub> |
| zu Fuss                                      | <input type="checkbox"/> <sub>1</sub> | <input type="checkbox"/> <sub>2</sub> | <input type="checkbox"/> <sub>3</sub> | <input type="checkbox"/> <sub>4</sub> | <input type="checkbox"/> <sub>5</sub> | <input type="checkbox"/> <sub>6</sub> | <input type="checkbox"/> <sub>7</sub> |
| anderes                                      | <input type="checkbox"/> <sub>1</sub> | <input type="checkbox"/> <sub>2</sub> | <input type="checkbox"/> <sub>3</sub> | <input type="checkbox"/> <sub>4</sub> | <input type="checkbox"/> <sub>5</sub> | <input type="checkbox"/> <sub>6</sub> | <input type="checkbox"/> <sub>7</sub> |

anderes, und zwar: \_\_\_\_\_

### B.2. Wie oft unternehmen Sie folgende Aktivitäten?

|                                                   | täglich                               | mehrmals die Woche                    | mehrmals im Monat                     | seltener                              | nie                                   | weiss nicht                           | keine Angabe                          |
|---------------------------------------------------|---------------------------------------|---------------------------------------|---------------------------------------|---------------------------------------|---------------------------------------|---------------------------------------|---------------------------------------|
| Einkaufen in Einkaufshäusern (Coop, Migros, etc.) | <input type="checkbox"/> <sub>1</sub> | <input type="checkbox"/> <sub>2</sub> | <input type="checkbox"/> <sub>3</sub> | <input type="checkbox"/> <sub>4</sub> | <input type="checkbox"/> <sub>5</sub> | <input type="checkbox"/> <sub>6</sub> | <input type="checkbox"/> <sub>7</sub> |
| Kino                                              | <input type="checkbox"/> <sub>1</sub> | <input type="checkbox"/> <sub>2</sub> | <input type="checkbox"/> <sub>3</sub> | <input type="checkbox"/> <sub>4</sub> | <input type="checkbox"/> <sub>5</sub> | <input type="checkbox"/> <sub>6</sub> | <input type="checkbox"/> <sub>7</sub> |
| Restaurant/ Café/ Bar                             | <input type="checkbox"/> <sub>1</sub> | <input type="checkbox"/> <sub>2</sub> | <input type="checkbox"/> <sub>3</sub> | <input type="checkbox"/> <sub>4</sub> | <input type="checkbox"/> <sub>5</sub> | <input type="checkbox"/> <sub>6</sub> | <input type="checkbox"/> <sub>7</sub> |
| Kulturelle Veranstaltungen                        | <input type="checkbox"/> <sub>1</sub> | <input type="checkbox"/> <sub>2</sub> | <input type="checkbox"/> <sub>3</sub> | <input type="checkbox"/> <sub>4</sub> | <input type="checkbox"/> <sub>5</sub> | <input type="checkbox"/> <sub>6</sub> | <input type="checkbox"/> <sub>7</sub> |
| Sportveranstaltungen/spiele                       | <input type="checkbox"/> <sub>1</sub> | <input type="checkbox"/> <sub>2</sub> | <input type="checkbox"/> <sub>3</sub> | <input type="checkbox"/> <sub>4</sub> | <input type="checkbox"/> <sub>5</sub> | <input type="checkbox"/> <sub>6</sub> | <input type="checkbox"/> <sub>7</sub> |

### B.3. Mit wie vielen Personen haben Sie an einem regulären Wochentag schätzungsweise Kontakt (Arbeitsumfeld, Familie, Freunde, Vereine)?

<sub>1</sub> 0-10      <sub>2</sub> 10-50      <sub>3</sub> 50-100      <sub>4</sub> mehr als 100

### B.4. Falls Sie erwerbstätig sind, haben Sie bei Ihrer Arbeit häufigen Kontakt mit anderen Menschen?

<sub>1</sub> nein      <sub>2</sub> ja      <sub>3</sub> keine Angabe

### B.5. Arbeiten Sie im Gesundheitswesen mit Patientenkontakt (Medizinal- oder Pflegefachperson)?

<sub>1</sub> nein      <sub>2</sub> ja      <sub>3</sub> keine Angabe

### B.6. Arbeiten Sie mit Kindern (Kindergarten, Spielgruppe, Kindertagesstätte, Schule etc.)?

<sub>1</sub> nein      <sub>2</sub> ja      <sub>3</sub> keine Angabe

### B.7. Befindet sich Ihr Arbeitsplatz in einem Grossraumbüro bzw. in einem Raum mit vielen Menschen?

<sub>1</sub> nein      <sub>2</sub> ja      <sub>3</sub> keine Angabe

### B.8. Fühlen Sie sich in Ihrem Wohnumfeld schädlichen Umwelteinflüssen ausgesetzt? (zum Beispiel: Abgase, Feinstaub, Elektromog, Lärm etc.)

<sub>1</sub> nein      <sub>2</sub> ja      <sub>3</sub> keine Angabe

Wenn ja, welchen: \_\_\_\_\_

### B.9. Haben Sie diesen Herbst/Winter Personen im Spital oder Altersheim besucht?

<sub>1</sub> nein      <sub>2</sub> ja

Wenn ja, wie oft:

<sub>1</sub> 1-4 mal      <sub>2</sub> mehr als 5mal      <sub>3</sub> Ich besuche regelmässig Personen in Gesundheitseinrichtungen.

### B.10. Betreuen Sie regelmässig pflegebedürftige Angehörige zu Hause?

<sub>1</sub> nein      <sub>2</sub> ja

### B.11. Leben Sie mit Personen zusammen, die an einer chronischen Erkrankung leiden?

<sub>1</sub> nein      <sub>2</sub> ja

## C. Informationsbeschaffung über Gesundheitsfragen

### C.1. Woher beziehen Sie Ihre Informationen zu Gesundheitsthemen? (Mehrfachnennungen möglich)

- <sub>1</sub> Ärztin / Arzt  
<sub>2</sub> Apotheke  
<sub>3</sub> Soziales Umfeld (Freunde, Bekannte, Familie etc.)  
<sub>4</sub> Religiös-kulturelles Umfeld  
<sub>5</sub> Andere Informationsquelle und zwar: \_\_\_\_\_
- <sub>6</sub> TV  
<sub>7</sub> Radio  
<sub>8</sub> Zeitungen und Zeitschriften  
<sub>9</sub> Soziale Netzwerke  
<sub>10</sub> Internet, und zwar:  
<sub>11</sub> über Erfahrungsberichte anderer Personen  
<sub>12</sub> über offizielle Webseiten (Bundesamt für Gesundheit, Spital)  
<sub>13</sub> über andere Seiten: \_\_\_\_\_
- <sub>14</sub> Ich informiere mich nicht.

### C.2. Wie hilfreich finden Sie die angebotenen Informationen?

|                                                   | sehr<br>hilfreich                     | hilfreich                             | mittel                                | weniger<br>hilfreich                  | gar nicht<br>hilfreich                | weiss nicht                           | keine<br>Angabe                       |
|---------------------------------------------------|---------------------------------------|---------------------------------------|---------------------------------------|---------------------------------------|---------------------------------------|---------------------------------------|---------------------------------------|
| Ärztin / Arzt                                     | <input type="checkbox"/> <sub>1</sub> | <input type="checkbox"/> <sub>2</sub> | <input type="checkbox"/> <sub>3</sub> | <input type="checkbox"/> <sub>4</sub> | <input type="checkbox"/> <sub>5</sub> | <input type="checkbox"/> <sub>6</sub> | <input type="checkbox"/> <sub>7</sub> |
| Apotheke                                          | <input type="checkbox"/> <sub>1</sub> | <input type="checkbox"/> <sub>2</sub> | <input type="checkbox"/> <sub>3</sub> | <input type="checkbox"/> <sub>4</sub> | <input type="checkbox"/> <sub>5</sub> | <input type="checkbox"/> <sub>6</sub> | <input type="checkbox"/> <sub>7</sub> |
| Soziales Umfeld (Freunde, Bekannte, Familie etc.) | <input type="checkbox"/> <sub>1</sub> | <input type="checkbox"/> <sub>2</sub> | <input type="checkbox"/> <sub>3</sub> | <input type="checkbox"/> <sub>4</sub> | <input type="checkbox"/> <sub>5</sub> | <input type="checkbox"/> <sub>6</sub> | <input type="checkbox"/> <sub>7</sub> |
| Religiös-kulturelles Umfeld                       | <input type="checkbox"/> <sub>1</sub> | <input type="checkbox"/> <sub>2</sub> | <input type="checkbox"/> <sub>3</sub> | <input type="checkbox"/> <sub>4</sub> | <input type="checkbox"/> <sub>5</sub> | <input type="checkbox"/> <sub>6</sub> | <input type="checkbox"/> <sub>7</sub> |
| TV                                                | <input type="checkbox"/> <sub>1</sub> | <input type="checkbox"/> <sub>2</sub> | <input type="checkbox"/> <sub>3</sub> | <input type="checkbox"/> <sub>4</sub> | <input type="checkbox"/> <sub>5</sub> | <input type="checkbox"/> <sub>6</sub> | <input type="checkbox"/> <sub>7</sub> |
| Radio                                             | <input type="checkbox"/> <sub>1</sub> | <input type="checkbox"/> <sub>2</sub> | <input type="checkbox"/> <sub>3</sub> | <input type="checkbox"/> <sub>4</sub> | <input type="checkbox"/> <sub>5</sub> | <input type="checkbox"/> <sub>6</sub> | <input type="checkbox"/> <sub>7</sub> |
| Zeitungen und Zeitschriften                       | <input type="checkbox"/> <sub>1</sub> | <input type="checkbox"/> <sub>2</sub> | <input type="checkbox"/> <sub>3</sub> | <input type="checkbox"/> <sub>4</sub> | <input type="checkbox"/> <sub>5</sub> | <input type="checkbox"/> <sub>6</sub> | <input type="checkbox"/> <sub>7</sub> |
| Soziale Netzwerke                                 | <input type="checkbox"/> <sub>1</sub> | <input type="checkbox"/> <sub>2</sub> | <input type="checkbox"/> <sub>3</sub> | <input type="checkbox"/> <sub>4</sub> | <input type="checkbox"/> <sub>5</sub> | <input type="checkbox"/> <sub>6</sub> | <input type="checkbox"/> <sub>7</sub> |
| Erfahrungsberichte im Internet                    | <input type="checkbox"/> <sub>1</sub> | <input type="checkbox"/> <sub>2</sub> | <input type="checkbox"/> <sub>3</sub> | <input type="checkbox"/> <sub>4</sub> | <input type="checkbox"/> <sub>5</sub> | <input type="checkbox"/> <sub>6</sub> | <input type="checkbox"/> <sub>7</sub> |
| Offizielle Seiten im Internet                     | <input type="checkbox"/> <sub>1</sub> | <input type="checkbox"/> <sub>2</sub> | <input type="checkbox"/> <sub>3</sub> | <input type="checkbox"/> <sub>4</sub> | <input type="checkbox"/> <sub>5</sub> | <input type="checkbox"/> <sub>6</sub> | <input type="checkbox"/> <sub>7</sub> |
| Andere Seiten im Internet                         | <input type="checkbox"/> <sub>1</sub> | <input type="checkbox"/> <sub>2</sub> | <input type="checkbox"/> <sub>3</sub> | <input type="checkbox"/> <sub>4</sub> | <input type="checkbox"/> <sub>5</sub> | <input type="checkbox"/> <sub>6</sub> | <input type="checkbox"/> <sub>7</sub> |
| Andere Informationsquelle                         | <input type="checkbox"/> <sub>1</sub> | <input type="checkbox"/> <sub>2</sub> | <input type="checkbox"/> <sub>3</sub> | <input type="checkbox"/> <sub>4</sub> | <input type="checkbox"/> <sub>5</sub> | <input type="checkbox"/> <sub>6</sub> | <input type="checkbox"/> <sub>7</sub> |

## D. Personenbezogene Angaben

### D.1. Geschlecht

<sub>1</sub> männlich    <sub>2</sub> weiblich

### D.2. Geburtsjahr:

\_\_\_\_\_

### D.3. Nationalität

<sub>1</sub> SchweizerIn    <sub>2</sub> andere Nationalität: \_\_\_\_\_    <sub>3</sub> keine Angabe

### D.4. Wie lange wohnen Sie schon an Ihrem jetzigen Wohnort?

<sub>1</sub> bis zu 1 Jahr    <sub>3</sub> mehr als 2 bis 5 Jahre    <sub>5</sub> mehr als 10 bis 15 Jahre    <sub>7</sub> keine Angabe  
<sub>2</sub> mehr als 1 bis 2 Jahre    <sub>4</sub> mehr als 5 bis 10 Jahre    <sub>6</sub> mehr als 15 Jahre

### D.5. Bitte schauen Sie sich die Karte Ihres Quartiers auf der letzten Seite an. In welchem Abschnitt wohnen Sie?

Geben Sie dazu bitte die Koordinaten (Kombination von Buchstaben und Zahl auf der waagerechten bzw. senkrechten Achse) ein.  
 Abschnitt: \_\_\_\_\_

### D.6. Wohnstatus des Haushaltes, in dem Sie leben:

<sub>1</sub> Eigentumswohnung    <sub>3</sub> Mietwohnung    <sub>5</sub> Genossenschaftswohnung    <sub>7</sub> anderes: \_\_\_\_\_  
<sub>2</sub> Eigenes Haus    <sub>4</sub> Haus zur Miete    <sub>6</sub> Altersresidenz/Altersheim    <sub>8</sub> keine Angabe

Anzahl Quadratmeter der Wohnung/ des Hauses \_\_\_\_\_

### D.7. Wie viele Personen leben in Ihrem Haushalt / Wohngemeinschaft inklusive Ihnen?

\_\_\_\_\_ Personen

### D.8. Wie viele Kinder leben in Ihrem Haushalt?

|                          | 0                                     | 1                                     | 2                                     | 3                                     | mehr als 3                            |
|--------------------------|---------------------------------------|---------------------------------------|---------------------------------------|---------------------------------------|---------------------------------------|
| Kinder unter 7 Jahre alt | <input type="checkbox"/> <sub>1</sub> | <input type="checkbox"/> <sub>2</sub> | <input type="checkbox"/> <sub>3</sub> | <input type="checkbox"/> <sub>4</sub> | <input type="checkbox"/> <sub>5</sub> |
| Kinder über 7 Jahre alt  | <input type="checkbox"/> <sub>1</sub> | <input type="checkbox"/> <sub>2</sub> | <input type="checkbox"/> <sub>3</sub> | <input type="checkbox"/> <sub>4</sub> | <input type="checkbox"/> <sub>5</sub> |

### D.9. Falls Sie Kinder unter 7 Jahre haben, werden diese auswärtig mit anderen Kindern betreut bzw. versorgt?

<sub>1</sub> nein    <sub>2</sub> ja

### D.10. Wie setzt sich ihr Haushalt zusammen?

<sub>1</sub> Einpersonenhaushalt    <sub>3</sub> (Ehe-)Paar mit Kind    <sub>5</sub> Alleinerziehend mit Kind    <sub>7</sub> keine Angabe  
<sub>2</sub> Wohngemeinschaft    <sub>4</sub> (Ehe-)Paar ohne Kind    <sub>6</sub> Sonstiges: \_\_\_\_\_

### D.11. Wo haben Sie Ihren höchsten Bildungsabschluss erworben?

<sub>1</sub> Obligatorische Schule    <sub>4</sub> Höhere Berufsbildung    <sub>5</sub> Hochschule (ETH, Uni, FH, PH)  
<sub>2</sub> Berufslehre/-ausbildung, Berufsschule    (KV/Handelsschule, höhere    <sub>6</sub> anderer Schulabschluss \_\_\_\_\_  
<sub>3</sub> Gymnasium    Fachschule, Meister, Techniker)    <sub>7</sub> keine Angabe

### D.12. Sind Sie aktuell erwerbstätig? (Mehrfachnennungen möglich)

<sub>1</sub> Vollzeit (mind. 90%)    <sub>3</sub> SchülerIn/Lehrling/StudentIn    <sub>5</sub> RentnerIn    <sub>7</sub> Freiwilligenarbeit  
<sub>2</sub> Teilzeit/Nebenerwerb (<90%)    <sub>4</sub> Hausfrau/Hausmann    <sub>6</sub> zurzeit nicht erwerbstätig    <sub>8</sub> keine Angabe

### D.13. Falls Sie erwerbstätig sind, welches ist Ihre aktuelle berufliche Stellung?

<sub>1</sub> Angestellter mit Führungsfunktion    <sub>2</sub> Angestellter ohne Führungsfunktion    <sub>3</sub> selbstständig

### D.14. Einkommenskategorie (Monatliches Brutto-Haushaltseinkommen)

<sub>1</sub> bis CHF 2000.-    <sub>3</sub> 4001-6000 CHF    <sub>5</sub> 8001-10'000 CHF    <sub>7</sub> > 15'000 CHF  
<sub>2</sub> 2001-4000 CHF    <sub>4</sub> 6001-8000 CHF    <sub>6</sub> 10'001-15'000 CHF    <sub>8</sub> keine Angabe

### D.15. Wo arbeiten Sie? (Ort und Postleitzahl) \_\_\_\_\_

**Karte zu Frage D5**

Bitte schauen Sie sich die Karte Ihres Quartiers an und zeichnen Sie auf der Karte ungefähr ein, wo Sie wohnen. Geben Sie dazu bitte die Koordinate (Kombination von Buchstaben und Zahl auf der waagerechten bzw. senkrechten Achse) an.

**Lesebeispiel (rechts)**

Sie wohnen an der Ecke Bläsiring / Müllheimerstrasse.  
Antwort: N12

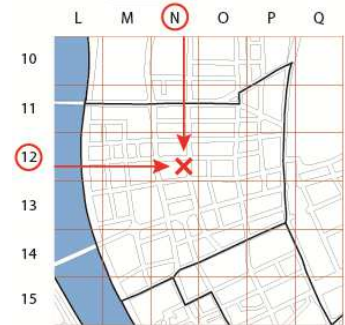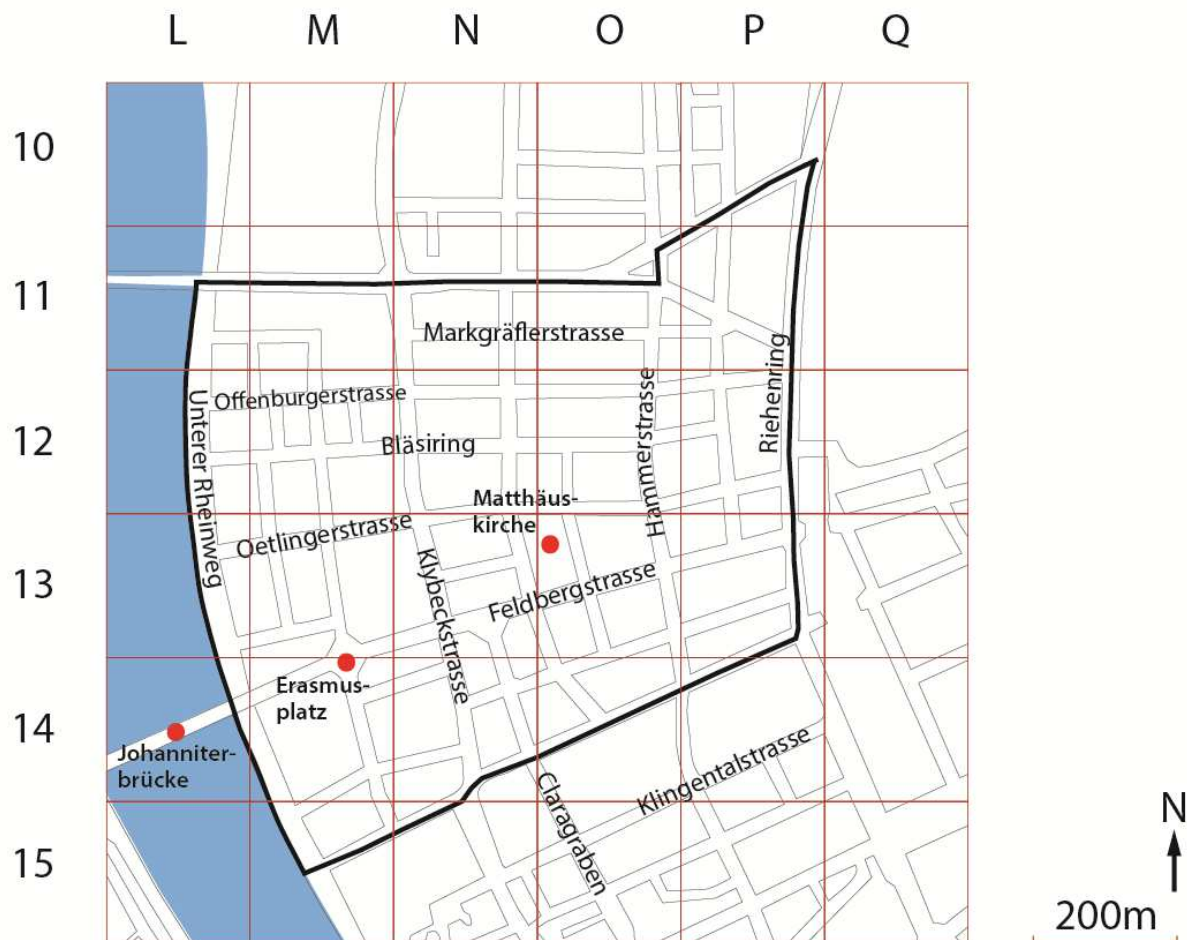

**Vielen Dank für Ihre Teilnahme.**

Falls Sie am Gewinnspiel für einen Apple Computer im Wert von CHF 2500.- und zwei Pro Innerstadt-Gutscheinen im Wert von je CHF 500.- teilnehmen möchten, können Sie hier Ihren Namen und Ihre Adresse angeben:

MA
